1 **Germ cell connectivity enhances cell death in response to DNA damage in *Drosophila* testis.**

2 Kevin L. Lu<sup>1,2,3</sup>, Yukiko M. Yamashita<sup>1,2,4,5</sup>

3 <sup>1</sup> Life Sciences Institute, <sup>2</sup> Cellular and Molecular Biology Program, <sup>3</sup> Medical Scientist Training  
 4 Program, <sup>4</sup> Department of Cell and Developmental Biology, <sup>5</sup> Howard Hughes Medical Institute,  
 5 University of Michigan, Ann Arbor, MI 48109

6

7

## 8 Abstract

9 Two broadly known characteristics of germ cells in many organisms are their development as a  
 10 ‘cyst’ of interconnected cells and their high sensitivity to DNA damage. Here we provide  
 11 evidence that these characteristics are linked, and that interconnectivity is a mechanism that  
 12 confers to the *Drosophila* testis a high sensitivity to DNA damage. We show that all germ cells  
 13 within a cyst die simultaneously even when only a subset of them exhibit detectable DNA  
 14 damage. Compromising connectivity results in cysts in which only a subset of germ cells die  
 15 upon DNA damage, lowering overall germ cell death. Our data indicate that a death-promoting  
 16 signal is shared through the intercellular connections of germ cells. Taken together, we propose  
 17 that intercellular connectivity is a mechanism that uniquely increases the sensitivity of the  
 18 germline to DNA damage, thereby protecting the integrity of gamete genomes that are passed on  
 19 to the next generation.

20

## Introduction

A prevalent feature of germ cell development across species is their proliferation as an interconnected cluster of cells, widely known as a germ cell cyst. In many organisms from insects to humans, germ cells divide with incomplete cytokinesis that results in interconnected cells with shared cytoplasm, leading to cyst formation (Greenbaum, Iwamori, Buchold, & Matzuk, 2011; Haglund, Nezis, & Stenmark, 2011; Pepling, de Cuevas, & Spradling, 1999). During oogenesis, this intercellular connectivity is critical for the process of oocyte specification, allowing only some of the developing germ cells to become oocytes while the others adopt a supportive role (de Cuevas, Lilly, & Spradling, 1997; Lei & Spradling, 2016; Pepling et al., 1999). For example, in the *Drosophila* ovary, four rounds of germ cell divisions with incomplete cytokinesis results in a cyst of 16 interconnected germ cells, where only one becomes an oocyte while the remaining 15 germ cells become nurse cells. During this process, nurse cells support oocyte development by providing their cytoplasmic contents to oocytes via intercellular trafficking (Cox, 2003; de Cuevas et al., 1997; Huynh & St Johnston, 2004). In contrast to oogenesis, where cytoplasmic connectivity has a clear developmental role in oocyte determination, spermatogenesis is a process where all germ cells within a cyst are considered to be equivalent and become mature gametes (Fuller, 1993; Yoshida, 2016). Despite the lack of a ‘nursing mechanism’ during spermatogenesis, intercellular connectivity is widely observed in spermatogenesis from insects to humans (Greenbaum et al., 2011; Yoshida, 2016). While a function for this connectivity has been proposed in post-meiotic spermatids (Braun, Behringer, Peschon, Brinster, & Palmiter, 1989), the biological significance of male germ cell connectivity during pre-meiotic stages of spermatogenesis remains unknown.

Another well-known characteristic of the germline is its extreme sensitivity to DNA damage compared to the soma, with clinical interventions such as radiation or chemotherapy often resulting in impaired fertility (Arnon, Meirow, Lewis-Roness, & Ornoy, 2001; Meistrich, 2013; Oakberg, 1955). It has been postulated that the high sensitivity of the germline to DNA damage is part of a quality control mechanism for the germ cell genome, which is passed on to the next generation (Gunes, Al-Sadaan, & Agarwal, 2015). However, the means by which the germline achieves such a high sensitivity to DNA damage remains unclear.

Here we provide evidence that germ cell connectivity serves as a mechanism to sensitize the germline in response to DNA damage, inducing cell death in the *Drosophila* testis. We show that an entire germ cell cyst undergoes synchronized cell death as a unit even when only a subset of cells within the cyst exhibit detectable DNA damage. Disruption of germ cell connectivity in mutants of the fusome, an organelle that connects the germ cells within a cyst, leads to death of individual germ cells within a cyst in response to DNA damage, reducing overall germ cell death. The sensitivity of a germ cell cyst to DNA damage increases as the number of interconnected germ cells within increases, demonstrating that connectivity serves as a mechanism to confer higher sensitivity to DNA damage. Taken together, we propose that germ

cell cyst formation serves as a mechanism to increase the sensitivity of genome surveillance, ensuring the quality of the genome that is passed on to the next generation.

## Results

### Ionizing radiation induces spermatogonial death preferentially at the 16-cell stage.

The *Drosophila* testis serves as an excellent model to study germ cell development owing to its well-defined spatiotemporal organization, with spermatogenesis proceeding from the apical tip down the length of the testis. Germline stem cells (GSCs) divide to produce gonialblasts (GBs), which undergo transit-amplifying divisions to become a cyst of 16 interconnected spermatogonia (16-SG) before entering meiosis (Fig. 1A). In our previous study we showed that protein starvation induces SG death, predominantly at the early stages (~4-SG stage) of SG development (Yang & Yamashita, 2015) (Fig. 1A). Starvation-induced SG death is mediated by apoptosis of somatic cyst cells encapsulating the SGs (Yang & Yamashita, 2015), which breaks the ‘blood-testis-barrier’ and leads to SG death (Fairchild, Smendziuk, & Tanentzapf, 2015; Lim & Fuller, 2012). Though we also noted significant SG death at the 16-SG stage in the course of our previous work, it was independent of nutrient conditions and thus was not the focus of the study (Yang & Yamashita, 2015).

In search of the cause of this 16-SG death, we discovered that it can be induced by ionizing radiation (see methods). When adult flies were exposed to ionizing radiation that causes DNA double strand breaks (DSBs), a dramatic induction of SG death was observed (Fig. 1B, C). Dying SGs induced by ionizing radiation were detected by Lysotracker staining, which marks acidified compartments, a hallmark of germ cell death (Yacobi-Sharon, Namdar, & Arama, 2013; Yang & Yamashita, 2015). SG death in control and irradiated flies proceeded in the same manner, where all of the SGs within a cyst die simultaneously by becoming Lysotracker-positive (Fig. 1B). Importantly, in contrast to starvation-induced SG death, which was dependent on somatic cyst cell apoptosis, radiation-induced SG death was not suppressed by inhibiting cyst cell apoptosis (Fig. 1 – Figure supplement 1), suggesting that radiation-induced SG death is a germ cell-intrinsic response.

The frequency of dying SG cysts peaked around 3 to 6 hours after irradiation and decreased by 24 hours post-irradiation (Fig. 1C). Interestingly, we found that ionizing radiation robustly induces cell death at the 16-SG stage, although death of other stages (2-, 4-, 8-cell SGs) was also induced (Fig. 1C and see below). This pattern of SG death held true regardless of the ionizing radiation dose (Fig. 1 - Figure supplement 2). While testing multiple doses of ionizing radiation, we noticed that even exposure to a very low dose of ionizing radiation could dramatically induce death of 16-SGs. By measuring dose-dependent death of 16-SGs at six hours post-irradiation, we found that the 16-SG death induced by increasing radiation was a distinctly

non-linear response, quickly reaching a plateau of ~3 dying 16-SG cysts per testis (Fig. 1D). In comparison, somatic cell death in a defined area of the irradiated wing imaginal disc (Fig. 1 – Figure supplement 3) followed a linear dose-response relationship where an increase in radiation resulted in a proportional increase in cell death (Fig. 1D). These results demonstrate a remarkable sensitivity of 16-SGs to ionizing radiation, compared to somatic cells from imaginal discs.

### **All SGs within a cyst die even when only a subset of cells exhibit detectable DNA damage.**

To gain insight into the cause of the unusual sensitivity of 16-SGs to DNA damage, we evaluated the response of SGs to ionizing radiation at a cell biological level. DSBs result in phosphorylation of the histone H2A variant ( $\gamma$ -H2Av), the *Drosophila* equivalent of mammalian  $\gamma$ -H2AX, reflecting the very early cellular response to DSBs (Madigan, Chotkowski, & Glaser, 2002). Using an anti- $\gamma$ -H2Av antibody (pS137), we confirmed that  $\gamma$ -H2Av can be robustly detected in SGs following a high dose of ionizing radiation (Fig. 2 – Figure supplement 1). When a low dose of ionizing radiation was used, we frequently observed 16-SG cysts in which only a subset of cells within the cyst possessed detectable  $\gamma$ -H2Av signal but all 16 cells were Lysotracker-positive and dying (Fig. 2A).

The fraction of  $\gamma$ -H2Av-positive SGs within each cyst increased gradually with increasing radiation dose irrespective of SG stage (Fig. 2B and Fig. 2 – Figure supplement 2), consistent with the linear nature of ionizing radiation damaging DNA molecules (Ulsh, 2010). However, Lysotracker staining showed that SGs within a cyst were always either all Lysotracker-positive or -negative (Fig. 2C). These results suggest that while DNA damage is induced in individual SGs within a cyst proportional to the dose of radiation, cell death is induced in all of the SGs within the entire cyst, leading to elevated SG death that follows a non-linear response with increasing dose.

### **The fusome is required for synchronized all-or-none SG death within the cysts.**

The above results led us to hypothesize that all SGs within a cyst might be triggered to die together even when only a subset of SGs within the cyst have detectable DNA damage, explaining the extremely high sensitivity of the germline to DNA damage. In *Drosophila* and other insects, the fusome is a germline-specific membranous organelle that connects the cytoplasm of germ cells within a cyst and mediates intracyst signaling amongst germ cells (Lilly, de Cuevas, & Spradling, 2000; Lin, Yue, & Spradling, 1994). We speculated that if germ cell cysts undergo synchronized cell death by sharing the decision to die, the fusome might mediate the ‘all-or-none’ mode of SG death upon DNA damage.

To examine the role of the fusome in all-or-none SG death upon irradiation, we used RNAi-mediated knockdown of *α-spectrin* and a mutant of *hts*, core components of the fusome (de Cuevas, Lee, & Spradling, 1996; Lilly et al., 2000; Lin et al., 1994) (Fig. 3 – Figure supplement 1). Mutant and control flies were irradiated and their testes were stained with Lysotracker to identify dying SGs in combination with the lipophilic dye FM 4-64 to mark cyst cell membranes, demarcating the boundaries of SG cysts (see methods) (Chiang, Yang, & Yamashita, 2017). In control testes, 16-SG cysts were almost always found to be either completely Lysotracker-positive or -negative under all conditions tested as described above, indicating that 16-SG cysts make an all-or-none death decision (Fig. 3A, B, E, F). Of particular importance, even at a lower dose of radiation (e.g. 100 rad) where only a subset of germ cells exhibit visible  $\gamma$ -H2Av staining (Fig. 2B), the 16-SG cyst was either entirely Lysotracker-negative or -positive. In contrast, *α-spectrin* RNAi and *hts* mutant testes frequently contained 16-SG cysts with a mixture of individual Lysotracker-positive and -negative SGs (Fig. 3C, D, G, H), suggesting that the all-or-none mode of SG death was compromised. Importantly, the mean fraction of 16-SG that died in response to radiation exposure at any dose was significantly reduced when the fusome was disrupted (Fig. 3B, D, F, H, see Supplementary Table S1 for statistics). These data show that the fusome is required for the coordinated death of all SGs within a cyst, and suggests that connectivity of SGs increases overall SG death in response to radiation-induced DNA damage. Moreover, the fact that loss of germ cell connectivity in fusome mutants allows for the survival of some SGs strongly argues against the possibility that SGs without cytologically detectable  $\gamma$ -H2Av are sufficiently damaged to trigger cell death on their own, and that SGs are individually dying. Instead, the death of SGs without detectable  $\gamma$ -H2Av in wild type/control can likely be attributed to a shared signal from other cells, as blockade of intercellular communication in fusome mutants allows for their survival.

## The mitochondrial protease HtrA2/Omi is required for all-or-none SG death

The above results suggest that intercellular connectivity mediated by the fusome plays a critical role in allowing for all-or-none commitment of SGs to death or survival. Based on these results, we hypothesized that a signal to promote cell death exists that is rapidly transmitted from damaged SGs to others via their intercellular connections.

It has previously been shown that germ cell death in the *Drosophila* testis depends on mitochondria-associated factors rather than effector caspases (Yacobi-Sharon et al., 2013). In response to nuclear DNA damage, the *Drosophila* homolog of the mitochondrial serine protease HtrA2/Omi is cleaved and released from the mitochondrial compartment as part of the mitochondria-associated death pathway, and interacts with components of the apoptotic machinery in the cytoplasm to promote cell death (Igaki et al., 2007; Khan et al., 2008; Tain et al., 2009; Vande Walle, Lamkanfi, & Vandenabeele, 2008).

In *HtrA2/Omi* mutant flies, we frequently observed a mix of Lysotracker-positive and -negative SGs within a single cyst, similar to what was seen in fusome mutants (Fig. 4A). Disruption of the all-or-none mode of SG death within the cyst was observed at any dose of radiation tested (Fig. 4B). Disrupted all-or-none SG death occurred in both heterozygous (*Omi<sup>Δ1</sup>/+*) and transheterozygous (*Omi<sup>Δ1</sup>/Omi<sup>Df1</sup>*) conditions, consistent with the previous report that heterozygous conditions exhibit haploinsufficiency in inducing SG death (Yacobi-Sharon et al., 2013). In contrast, wild type control 16-SG cysts maintained their all-or-none mode of SG death (Fig. 4B). Taken together, these data show that *HtrA2/Omi* is critical for all-or-none SG death within a cyst, and imply a role for *HtrA2/Omi* in propagating the signal to initiate germ cell death within a SG cyst, possibly through its cycle of cleavage and release from mitochondria.

### ***p53* and *mnk/chk2* do not regulate the all-or-none mode of SG death**

The DNA damage response is a highly conserved pathway controlling cell death and DNA repair (Ciccio & Elledge, 2010; Song, 2005). We thus examined the potential involvement in radiation-induced SG death of the universal DNA damage response pathway components, *mnk/chk2* and *p53*, whose conserved function in DNA damage response in *Drosophila* has been shown (Brodsky et al., 2004; Peters et al., 2002). By using well-characterized loss-of-function alleles (*mnk<sup>6006</sup>* and *p53<sup>5A-1-4</sup>*) (Takada, Kelkar, & Theurkauf, 2003; Wichmann, Jaklevic, & Su, 2006; Xie & Golic, 2004), we found that these mutants broadly suppress SG death at high and low doses of radiation (Fig. 5D). However, SG death in these mutants maintained an all-or-none pattern (Fig. 5A-C, E). These results suggest that while *p53* and *mnk/chk2* may contribute to SG death via their general role in controlling the DNA damage response as has been described in somatic cells, they do not play a role in mediating the all-or-none pattern of SG death within a cyst that is unique to interconnected germ cells.

Consistent with the idea that neither *mnk/chk2* or *p53* is responsible for a germline-specific DNA damage response, *Mnk/Chk2* or *p53* was not upregulated in the germline in response to a low dose of radiation (100 rad), which is normally sufficient to induce robust SG death. Using a polyclonal anti-Mnk/Chk2 antibody (Takada, Collins, & Kurahashi, 2015), we were unable to detect induction of Mnk/Chk2 at a low radiation dose, and even at a high dose Mnk/Chk2 staining was mostly limited to somatic cells (Fig. 5 – Figure supplement 1). Likewise, a *p53* transcriptional reporter (Wylie et al., 2014) was not upregulated in response to a low dose of radiation (Fig. 5 – Figure supplement 2). Even at a high dose, the reporter expression was observed only at 24 hours after irradiation, much later than the peak of SG death, which typically happens within a few hours. Collectively, these data indicate that differential expression of *p53* or *Mnk/Chk2* in SGs is unlikely to account for the high sensitivity of the germline to DNA damage.



## Increasing connectivity of SGs inherently increases sensitivity to DNA damage

The above results suggest that the robust ability of SGs to trigger cell death in response to DNA damage is facilitated by the sharing of signals to die amongst SGs within a cyst, killing SGs that are not sufficiently damaged to commit to cell death on their own. This sharing of death signals is mediated by and dependent on germ cell connectivity. If this is the case, it would be predicted that increasing the connectivity of a SG cyst (the number of interconnected SGs within the cyst) would increase its sensitivity to DNA damage. Indeed, as mentioned above, we observed a trend of 16-SG cysts dying more frequently than 2-, 4-, or 8-SGs (Fig. 1C, Fig 1 – Figure supplement 2). By plotting cell death frequency of all SG stages as a function of increasing radiation dose (Fig. 6A), it becomes clear that the sensitivity of SG cysts correlates with their connectivity, where 8-SGs are less sensitive than 16-SGs but more sensitive than 4-SGs and so on. Interestingly, single-celled GBs, the immediate daughter of GSCs that have not formed any intercellular connections, exhibited an essentially linear increase in death in response to radiation dose, which is reminiscent of somatic imaginal disc cells (Fig. 1D). These results further support the idea that germ cell connectivity plays a key role in increasing the sensitivity of the germline to DNA damage.

## Discussion

Our present study may provide a link between two long-standing observations in germ cell biology: 1) the broad conservation of intercellular connectivity (cyst formation) of germ cells and 2) the increased sensitivity of the germline to DNA damage compared to the soma. Our study shows that the connectivity of germ cells is a key mechanism for their ability to robustly induce cell death. We propose that connectivity allows for the sharing of signals that leads to cell death (Fig. 6B). We imagine two possibilities to explain how the signals are shared leading to cell death: when one SG within a cyst decides to die, this ‘decision of death’ might be sent to all the other SGs within the cyst, leading to all-or-none SG death. Alternatively, the signal shared among SGs may be ‘additive’ in nature. In such a scenario, even when none of the individual SGs have sufficient DNA damage to trigger cell death on its own, addition of all damage signaling within the cyst might reach a level sufficient to cause activation of an intracellular cascade that induces cell death. Such a response would effectively lower the threshold of DNA damage needed per cell to trigger germ cell death. Either way, the sharing of signals between SGs through intercellular connections increases their likelihood to die following DNA damage, explaining the unusually high sensitivity of the germline to DNA damage.

According to this model, higher connectivity would confer higher sensitivity to DNA damage: as the connectivity increases, more cells would contribute to detecting any DNA damage the germline may be experiencing. Indeed, our data show a direct correlation between sensitivity to radiation and the increasing connectivity of SG cysts (Fig. 6A). Remarkably, the



fact that single-celled, unconnected GBs exhibit an essentially linear death response to increasing radiation suggests that individual germ cells do not have an intrinsically different DNA damage response that accounts for their high sensitivity to DNA damage (Fig. 6A).

A connectivity-based increase in sensitivity to DNA damage also has an important implication in the development of multicellular organisms. To pass on genomes to the next generation, it is critically important for germ cells to have the most stringent mechanisms to prevent deleterious mutations. However, as genome size increases in multicellular organisms, ubiquitously increasing the stringency of genome quality control would result in a high rate of cell death in all tissues, which could compromise the development or survival of organisms. Thus, a multicellular organism would require differential sensitivities to DNA damage between the soma and the germline. The germline would require a more sensitive genome surveillance mechanism to produce gametes with the highest genome quality, whereas the priority of the soma shifts toward survival in order to support development and maintenance of somatic organs. A connectivity-based increase in sensitivity to DNA damage would be a simple method for multicellular organisms to achieve drastically different sensitivities to DNA damage between the soma and germline without having to alter intrinsic damage response pathways. Thus, we speculate that one reason germ cell connectivity has arisen during evolution might be to confer higher sensitivity to DNA damage specifically in the germline.

## Acknowledgements

We thank Drs. Saeko Takada, William Theurkauf, Eli Arama, and John Abrams for reagents. Bloomington Stock Center, the Developmental Studies Hybridoma Bank for reagents, the University of Michigan Experimental Irradiation Core for radiation experiments, Lei Lei, Sue Hammoud and Yamashita lab members for comments on the manuscript.

## Author contributions

K.L. conducted all experiments. K.L. and Y.Y. designed experiments, interpreted results, analyzed the data and wrote the manuscript.

This work was supported the University of Michigan Medical Scientist Training Program, by the University of Michigan Career Training in Reproductive Biology training grant [T32 HD079342] and by NIH Fellowship [F30 AG050398-01] to K.L. The research in the Yamashita laboratory is supported by the Howard Hughes Medical Institute. Y.M.Y. is supported by the MacArthur Foundation. Deposited in PMC for release after 6 months.

## Materials and methods

### Fly husbandry and strains:

All fly stocks were raised on standard Bloomington medium at 25°C, and young flies (0 to 2-day old adults) were used for all experiments unless otherwise noted. The following fly stocks were used: *hts*<sup>01103</sup> (Yuan, Chiang, Cheng, Salzmann, & Yamashita, 2012), *nos-gal4* (Van Doren, Williamson, & Lehmann, 1998), *UAS- $\alpha$ -spectrin*<sup>RNAi</sup> (TRiP.HMC04371), *c587-gal4* (Decotto & Spradling, 2005), *UAS-Diap1* (obtained from the Bloomington Stock Center), *p53*<sup>5A-1-4</sup> (Wichmann et al., 2006; Xie & Golic, 2004), *Df(2R)BSC26*, *Df(3R)ED6096*, *Df(2L)Exel7077* (obtained from the Bloomington Stock Center), *p53RE-GFP-nls* reporter (Wylie et al., 2014) (a gift of John Abrams, University of Texas Southwestern Medical Center), *Omi*<sup>Δ1</sup>, *Omi*<sup>Df1</sup> (Tain et al., 2009; Yacobi-Sharon et al., 2013) (a gift of Eli Arama, Weizmann Institute of Science), *mnk*<sup>6006</sup> (Takada et al., 2003) (a gift of William Theurkauf, University of Massachusetts Medical School).

### Immunofluorescence staining and microscopy:

Immunofluorescence staining of testes was performed as described previously (Cheng et al., 2008). Briefly, testes were dissected in PBS, transferred to 4% formaldehyde in PBS and fixed for 30 minutes. Testes were then washed in PBS-T (PBS containing 0.1% Triton-X) for at least 60 minutes, followed by incubation with primary antibody in 3% bovine serum albumin (BSA) in PBS-T at 4°C overnight. Samples were washed for 60 minutes (three 20-minute washes) in PBS-T, incubated with secondary antibody in 3% BSA in PBS-T at 4°C overnight, washed as above, and mounted in VECTASHIELD with DAPI (Vector Labs). The following primary antibodies were used: mouse anti-Adducin-like 1B1 (*hu-li tai shao* – Fly Base) [1:20; Developmental Studies Hybridoma Bank (DSHB); developed by H.D. Lipshitz]; mouse anti- $\alpha$ -spectrin 3A9 (1:20; DSHB; developed by R. Dubreuil, T. Byers); rat anti-vasa (1:50; DSHB; developed by A. Spradling), rabbit anti-vasa (1:200; d-26; Santa Cruz Biotechnology), mouse anti-Fasciclin III (1:200; DSHB; developed by C. Goodman), anti-LaminDm0 (1:200; DSHB; developed by P. A. Fisher), rabbit anti- $\gamma$ -H2AvD pS137 (1:100; Rockland), rabbit anti-mnk (1:100; courtesy of Saeko Takada). Images were taken using a Leica TCS SP8 confocal microscope with 63x oil-immersion objectives (NA=1.4) and processed using Adobe Photoshop software. For detection of germ cell death, testes were stained with LysoTracker Red DND-99 in PBS (1:1000) for 30 minutes prior to formaldehyde fixation. Stages (GB, 2-, 4-, 8-, and 16-SGs) of dying SGs were identified by counting the number of nuclei within the cyst visualized by Lamin Dm0 and DAPI (Chiang et al., 2017). Note that the number of ‘stageable’ dying SGs underrepresents the total population of dying SGs, because nuclear structures disintegrate during later phases of cell death and make it impossible to count the number of SGs within a dying cyst (Chiang et al., 2017). Such ‘unstageable’ SGs were not included in the scoring in this study.

For observation of unfixed samples, testes were dissected directly into PBS and incubated in the dark with the desired dyes for 5 minutes, mounted on slides with PBS and imaged within 10 minutes of dissection. The dyes used in live imaging are: LysoTracker Red DND-99 (1:200) or LysoTracker Green DND-26 (1:200) (Thermo Fisher Scientific), Hoechst 33342 (1:200), and FM4-64FX in PBS (1:200) (Thermo Fisher Scientific). SG stage (2-, 4-, 8-, or 16-SG) was

assessed by number of Hoechst-stained nuclei only when using unfixed samples. Note that the scoring of dying SGs is not directly comparable between fixed and unfixed samples (for example, results shown in Fig. 1 vs. Fig. 2), due to the difference in the method of SG staging and timing. In unfixed samples, SG cysts were staged by the number of Hoechst 33342-positive nuclei per cyst marked by FM4-64FX, whereas in fixed samples SG cysts were staged by the number of Lamin Dm0-positive nuclei per cyst.

### **Ionizing radiation**

For radiation doses of 25-250 rad, a  $^{137}\text{Cs}$  source was used with a dose rate of approximately 100 rad per minute. Additionally, for radiation doses 100 rad and above, a Philips RT250 model or Kimtron Medical IC-320 orthovoltage unit was used (dose rates of 200 and 400 rad per minute respectively). Dosimetry was carried out using an ionization chamber connected to an electrometer system directly traceable to National Institute of Standards and Technology calibration. The relative biological effectiveness of  $^{137}\text{Cs}$  and x-ray sources is comparable at lower doses (Fu, Phillips, Heilbron, Ross, & Kane, 1979), and experiments were repeated with both sources for 100-250 rad, which yielded essentially the same results irrespective of radiation source.

### **TUNEL Assay**

Larval heads with imaginal discs attached were dissected from third instar larvae into PBS, then fixed in 4% formaldehyde in PBS for 30 minutes. Samples were then washed in PBS-T (PBS containing 0.1% Triton-X) for at least 20 minutes, transferred to 100% methanol for 6 minutes with rocking, and washed again for at least 20 minutes in PBS-T. TUNEL assay was then carried out according to manufacturer's instructions using a Millipore ApopTag Red *In Situ* Apoptosis Detection Kit (S7165). Following washes with PBS-T for 20 minutes, wing imaginal discs were dissected from larval heads and mounted in VECTASHIELD with DAPI (Vector Labs).

### **Dose-response best fit regressions**

Best fit functions and lines for radiation dose-cell death response curves were generated by using GraphPad Prism 7 and the means-only values at all doses. Non-linear regressions were determined using a four-parameter logistic curve with no constraints on bottom, top, or hillslope and >1500 iterations. Standard linear regression was performed using cell death as a function of radiation dose. Goodness of fit, unadjusted  $R^2$  value, was determined by  $1.0 - \text{SS}_{\text{reg}}/\text{SS}_{\text{tot}}$ .

## Figure legends:

### Figure 1. A high level of SG death in response to ionizing radiation.

(A) Illustration of SG development and germ cell death in the *Drosophila* testis.  
 (B) An example of the testis apical tip (left panels) with dying SGs marked by Lysotracker staining in control and irradiated flies. High magnification images of dying 16-SGs (dotted outline) are shown in right panels. Lysotracker (red), Vasa (white), FasIII and Lamin Dm0 (green), and DAPI (blue). Bars: 25µm (left panels), 5 µm (right panels).  
 (C) Quantification of dying SG cysts by stage from 3 to 24 hours after 3000 rad (Mean ± SD). Testes sample  $n \geq 17$ , repeated in triplicate.  
 (D) Number of Lysotracker-positive 16-SG cysts (red) and TUNEL-positive wing imaginal disc cells (black) 6 hours post-irradiation as a function of radiation dose (Mean ± SD). Testes  $n \geq 17$  and wing disc  $n \geq 3$ , repeated in triplicate. Best fit lines shown determined by non-linear regression.

### Fig. 1 – Figure supplement 1. Radiation-induced SG cyst death is independent of somatic cyst cell apoptosis.

(A) Representative images of testes apical tips from wild type, *c587-gal4>UAS-Diap1*, and *nos-gal4>UAS-Diap1* expressing flies six hours after 2000 rad. Lysotracker (red), Vasa (white), FasIII and Lamin Dm0 (green), DAPI (blue). Bars: 25 µm.  
 (B) Quantification of dying SG cysts by stage from above (Mean ± SD), testes sample  $n \geq 15$  repeated in triplicate for each. No significant differences at any SG stage between WT vs. *c587>Diap1* or *nos>Diap1* (p-value \* <0.05 t-test).

### Fig. 1 – Figure supplement 2. SG death in response to ionizing radiation.

Quantification of SG death by stage and time following varying doses of ionizing radiation. (A) 25 rad ( $n = 66$ ), (B) 2000 rad ( $n = 84$ ), (C) 4000 rad ( $n = 68$ ).

### Fig. 1 – Figure supplement 3. TUNEL staining to detect somatic cell death in response to ionizing radiation.

TUNEL-positive foci were quantified in a defined 50 µm<sup>2</sup> field (dotted square) through entire z-sections in the anterior-ventral compartment of the wing imaginal discs from L3 larvae.

### Figure 2. All SGs within a cyst die even when only a fraction of cells exhibit detectable DNA damage.

(A) An example of a dying 16-SG cyst (yellow dotted outline) with only a subset of SGs containing detectable DNA damage (arrowhead). γ-H2Av (green), Lysotracker (red), Vasa (white). Bar: 5 µm.  
 (B) Number of γ-H2Av-positive cells within each 16-SG cyst at various radiation doses. Blue

circles, individual data points. Red line, mean.

(C) Number of Lysotracker-positive cells within each 16-SG cyst. Blue circles, individual data points. Red line, mean.

**Fig. 2 – Figure supplement 1.  $\gamma$ -H2Av can be strongly detected in germ cells following irradiation.**

Representative images of testes apical tips from unirradiated and irradiated flies. Vasa (white), FasIII and  $\gamma$ -H2Av (green). Bar: 25  $\mu$ m.

**Fig. 2 – Figure supplement 2. All SG stages show gradual accumulation of  $\gamma$ -H2Av-positive cells with increasing radiation.**

Number of  $\gamma$ -H2Av-positive cells per cyst at increasing radiation doses in (A) germline stem cells (B) gonialblasts (C) 2-SG (D) 4-SG (E) 8-SG. Red line, mean.

**Figure 3. The fusome is required for synchronized all-or-none SG death within a cyst.**

(A) A Lysotracker-positive 16-SG cyst (green, dotted outline) in unfixed control testes, with cyst borders marked by FM 4-64 (red) and SG nuclei marked by Hoechst 33342 (blue). Bar: 7.5  $\mu$ m.

(B) Number of Lysotracker-positive cells within each 16-SG cyst of control testes at varying radiation doses. Black line, mean.

(C) A 16-SG cyst (dotted outline) in *nos-gal4>UAS- $\alpha$ -spectrin<sup>RNAi</sup>* testes containing a single Lysotracker-positive SG (arrowhead). Bar: 10  $\mu$ m.

(D) Number of Lysotracker-positive cells within each 16-SG cyst of *nos-gal4>UAS- $\alpha$ -spectrin<sup>RNAi</sup>* testes at varying radiation doses. Black line, mean.

(E, F) *hts<sup>01103/+</sup>* control testes. Bar: 5  $\mu$ m.

(G, H) *hts<sup>01103</sup>/Df(2R)BSC26* mutant testes. Bar: 7.5  $\mu$ m.

**Fig. 3 – Figure supplement 1. Validation of fusome elimination in *hts* mutant and  *$\alpha$ -spectrin<sup>RNAi</sup>* testes.**

(A, B) Hts/Adducin staining (red) in control (A) and *hts<sup>01103</sup>/Df(2R)BSC26* mutant (B) testes. Red: Hts/Add and FasIII. Green: Vasa (germ cells). Bars: 25  $\mu$ m. Note that *hts* mutation eliminates fusome staining (leaving FasIII staining of the hub cells).

(C, D)  $\alpha$ -Spectrin staining (red) in control (C) and *nos-gal4>UAS-spectrin<sup>RNAi</sup>* (D) testes.  $\alpha$ -Spectrin and FasIII (red). Green: Vasa. Blue: DAPI.

**Figure 4. The mitochondrial protease HtrA2/Omi is required for all-or-none SG death.**

(A) SG cysts (dotted outlines) in *Omi<sup>Δ1</sup>/Omi<sup>Df1</sup>* mutant testes containing individual Lysotracker-positive SG (arrows). Hoechst 33342 (blue), FM 4-64 (red), Lysotracker (green). Bar: 10  $\mu$ m.

(B) Number of Lysotracker-positive SG in each 16-SG cyst in *Omi<sup>Δ1</sup>/Omi<sup>Δ1</sup>*, *Omi<sup>Δ1</sup>/+*, and wild type testes. Black line, mean.

**Figure 5. *p53* and *Chk2/mnk* suppress SG death but do not regulate the all-or-none mode of SG death.**

(A-C) Examples of dying 16-SGs (dotted outline) in wild-type (A), *mnk<sup>6006</sup>/Df(2L)Exel7077* mutant (B), and *p53<sup>5A-1-4</sup>/Df(3R)ED6096* mutant (C) testes. Lysotracker (red), Lamin Dm0 (green), DAPI (blue) and Vasa (white). Bars: 5 μm.

(D-G) SG cyst death by stage in *mnk/chk2* (D, F) and *p53* (E, G) mutants 6 hours after irradiation with 100 rad (D, E) and 2000 rad (F, G) (Mean ± SD, p-value \* <0.05 t-test). Fixed, stained samples were used for scoring. Testes sample n ≥ 11 for each genotype, repeated in triplicate.

(H) Number of Lysotracker-positive SG per 16-SG cyst in *mnk/chk2* and *p53* mutants following 100 rad. Red line, mean. Unfixed samples stained with Lysotracker, FM 4-64, and Hoechst 33342 were used for scoring.

**Fig. 5 – Figure supplement 1. Expression of Mnk/Chk2 in response to ionizing radiation.**

Testes from unirradiated flies (A), flies irradiated with 100 rad (B-D), or with 4000 rad (E-G), stained for Mnk/Chk2 (red), Vasa (white), Hts (green), and DAPI (blue). Bars: 25 μm.

Mnk/Chk2 was detected only after a high dose of radiation, predominantly in the somatic cyst cells surrounding the Vasa-positive germ cells.

**Fig. 5 – Figure supplement 2. Expression of p53 reporter in response to ionizing radiation.**

Testes from unirradiated flies (A), flies irradiated with 100 rad (B-D), or with 4000 rad (E-G), stained for p53RE-GFPnls (green), Vasa (blue), Hts/Adducin and FasIII (red). Bars: 25 μm.

p53RE-GFPnls was only detectable 24 hours following irradiation at a high dose (4000 rad).

**Figure 6. Increasing connectivity confers higher sensitivity to DNA damage**

(A) Dose-dependent SG death in 2-, 4-, 8-, and 16-SG cysts (Mean ± SD). Best fit lines shown determined by non-linear regression. Testes n ≥ 17, repeated in triplicate.

(B) Model of SG death enhanced by connectivity.



| Dose (rad) | Control | 95% CI        | <i>α-Spectrin</i> <sup>RNAi</sup> | 95% CI         | Kolmogorov-Smirnov p-value |
|------------|---------|---------------|-----------------------------------|----------------|----------------------------|
| 100        | 5.961   | 3.763<μ<8.158 | 0.7647                            | 0.0453<μ<1.484 | 0.0035                     |
| 500        | 5.073   | 3.427<μ<6.719 | 2.316                             | 1.049<μ<3.583  | 0.0582                     |
| 1000       | 7.442   | 4.957<μ<9.927 | 2.722                             | 0.8946<μ<4.55  | 0.0147                     |
| 2000       | 7.309   | 5.143<μ<9.475 | 2.578                             | 0.9354<μ<4.22  | 0.0121                     |
| 3000       | 5.517   | 2.573<μ<8.461 | 2.955                             | 0.1622<μ<5.747 | 0.8397                     |

| Dose (rad) | <i>hts</i> Control | 95% CI        | <i>hts</i> mutant | 95% CI        | Kolmogorov-Smirnov p-value |
|------------|--------------------|---------------|-------------------|---------------|----------------------------|
| 100        | 2.5                | 1.317<μ<3.683 | 0.5205            | 0<μ<1.137     | 0.4966                     |
| 500        | 2.282              | 0.956<μ<3.607 | 0.6727            | 0.019<μ<1.327 | 0.7395                     |
| 1000       | 4.14               | 1.972<μ<6.307 | 0.575             | 0<μ<1.407     | 0.2195                     |
| 2000       | 6                  | 3.491<μ<8.509 | 1.211             | 0<μ<2.445     | 0.0348                     |
| 3000       | 3.646              | 2.133<μ<5.158 | 1.578             | 0.3153<μ<2.84 | 0.4457                     |

**Supplementary Table S1. Fraction of 16-SG dying in fusome mutants.**

Statistics for mean number of dying cells per 16-SG cyst from Fig. 3 in control and fusome mutants. Kolmogorov-Smirnov test for comparing the distribution of two data sets at a given dose of radiation.

## References

- Arnon, J., Meirow, D., Lewis-Roness, H., & Ornoy, A. (2001). Genetic and teratogenic effects of cancer treatments on gametes and embryos. *Human Reproduction Update*, 7(4), 394–403. <http://doi.org/10.1093/HUMUPD/7.4.394>
- Braun, R. E., Behringer, R. R., Peschon, J. J., Brinster, R. L., & Palmiter, R. D. (1989). Genetically haploid spermatids are phenotypically diploid. *Nature*, 337(6205), 373–6. <http://doi.org/10.1038/337373a0>
- Brodsky, M. H., Weinert, B. T., Tsang, G., Rong, Y. S., McGinnis, N. M., Golic, K. G., ... Rubin, G. M. (2004). Drosophila melanogaster MNK/Chk2 and p53 regulate multiple DNA repair and apoptotic pathways following DNA damage. *Molecular and Cellular Biology*, 24(3), 1219–31. Retrieved from <http://www.ncbi.nlm.nih.gov/pubmed/14729967>
- Cheng, J., Türkel, N., Hemati, N., Fuller, M. T., Hunt, A. J., & Yamashita, Y. M. (2008). Centrosome misorientation reduces stem cell division during ageing. *Nature*, 456(7222), 599–604. <http://doi.org/10.1038/nature07386>
- Chiang, A. C.-Y., Yang, H., & Yamashita, Y. M. (2017). spict, a cyst cell-specific gene, regulates starvation-induced spermatogonial cell death in the Drosophila testis. *Scientific Reports*, 7, 40245. <http://doi.org/10.1038/srep40245>
- Ciccica, A., & Elledge, S. J. (2010). The DNA Damage Response: Making It Safe to Play with Knives. *Molecular Cell*, 40(2), 179–204. <http://doi.org/10.1016/j.molcel.2010.09.019>
- Cox, R. T. (2003). A Balbiani body and the fusome mediate mitochondrial inheritance during Drosophila oogenesis. *Development*, 130(8), 1579–1590. <http://doi.org/10.1242/dev.00365>
- de Cuevas, M., Lee, J. K., & Spradling, A. C. (1996). alpha-spectrin is required for germline cell division and differentiation in the Drosophila ovary. *Development*, 122(12).
- de Cuevas, M., Lilly, M., & Spradling, A. (1997). GERMLINE CYST FORMATION IN DROSOPHILA. *Annual Review of Genetics*, 31(1), 405–428. <http://doi.org/10.1146/annurev.genet.31.1.405>
- Decotto, E., & Spradling, A. C. (2005). The Drosophila Ovarian and Testis Stem Cell Niches: Similar Somatic Stem Cells and Signals. *Developmental Cell*, 9(4), 501–510. <http://doi.org/10.1016/j.devcel.2005.08.012>
- Fairchild, M. J., Smendziuk, C. M., & Tanentzapf, G. (2015). A somatic permeability barrier around the germline is essential for Drosophila spermatogenesis. *Development*, 142(2), 268–281. <http://doi.org/10.1242/dev.114967>
- Fu, K. K., Phillips, T. L., Heilbron, D. C., Ross, G., & Kane, L. J. (1979). Relative Biological Effectiveness of Low- and High-LET Radiotherapy Beams for Jejunal Crypt Cell Survival at Low Doses Per Fraction. *Radiology*, 132(1), 205–209. <http://doi.org/10.1148/132.1.205>
- Fuller, M. T. (1993). Spermatogenesis. In The Development of Drosophila melanogaster. In *The Development of Drosophila melanogaster* (Vol. 1, pp. 71–147). New York: Cold Spring Harbor Laboratory Press.

- 500 Greenbaum, M. P., Iwamori, T., Buchold, G. M., & Matzuk, M. M. (2011). Germ cell  
501 intercellular bridges. *Cold Spring Harbor Perspectives in Biology*, 3(8), a005850.  
502 <http://doi.org/10.1101/cshperspect.a005850>
- 503 Gunes, S., Al-Sadaan, M., & Agarwal, A. (2015). Spermatogenesis, DNA damage and DNA  
504 repair mechanisms in male infertility. *Reproductive BioMedicine Online*, 31(3), 309–319.  
505 <http://doi.org/10.1016/j.rbmo.2015.06.010>
- 506 Haglund, K., Nezis, I. P., & Stenmark, H. (2011). Structure and functions of stable intercellular  
507 bridges formed by incomplete cytokinesis during development. *Communicative &*  
508 *Integrative Biology*, 4(1), 1–9. <http://doi.org/10.4161/cib.4.1.13550>
- 509 Huynh, J.-R., & St Johnston, D. (2004). The Origin of Asymmetry: Early Polarisation of the  
510 Drosophila Germline Cyst and Oocyte. *Current Biology*, 14(11), R438–R449.  
511 <http://doi.org/10.1016/j.cub.2004.05.040>
- 512 Igaki, T., Suzuki, Y., Tokushige, N., Aonuma, H., Takahashi, R., & Miura, M. (2007). Evolution  
513 of mitochondrial cell death pathway: Proapoptotic role of HtrA2/Omi in Drosophila.  
514 *Biochemical and Biophysical Research Communications*, 356(4), 993–997.  
515 <http://doi.org/10.1016/j.bbrc.2007.03.079>
- 516 Khan, F. S., Fujioka, M., Datta, P., Fernandes-Alnemri, T., Jaynes, J. B., & Alnemri, E. S.  
517 (2008). The interaction of DIAP1 with dOmi/HtrA2 regulates cell death in Drosophila. *Cell*  
518 *Death and Differentiation*, 15(6), 1073–83. <http://doi.org/10.1038/cdd.2008.19>
- 519 Lei, L., & Spradling, A. C. (2016). Mouse oocytes differentiate through organelle enrichment  
520 from sister cyst germ cells. *Science*, 352(6281), 95–99.  
521 <http://doi.org/10.1126/science.aad2156>
- 522 Lilly, M. A., de Cuevas, M., & Spradling, A. C. (2000). Cyclin A Associates with the Fusome  
523 during Germline Cyst Formation in the Drosophila Ovary. *Developmental Biology*, 218(1),  
524 53–63. <http://doi.org/10.1006/dbio.1999.9570>
- 525 Lim, J. G. Y., & Fuller, M. T. (2012). Somatic cell lineage is required for differentiation and not  
526 maintenance of germline stem cells in Drosophila testes. *Proceedings of the National*  
527 *Academy of Sciences*, 109(45), 18477–18481. <http://doi.org/10.1073/pnas.1215516109>
- 528 Lin, H., Yue, L., & Spradling, A. C. (1994). The Drosophila fusome, a germline-specific  
529 organelle, contains membrane skeletal proteins and functions in cyst formation.  
530 *Development (Cambridge, England)*, 120(4), 947–56. Retrieved from  
531 <http://www.ncbi.nlm.nih.gov/pubmed/7600970>
- 532 Madigan, J. P., Chotkowski, H. L., & Glaser, R. L. (2002). DNA double-strand break-induced  
533 phosphorylation of Drosophila histone variant H2Av helps prevent radiation-induced  
534 apoptosis. *Nucleic Acids Research*, 30(17), 3698–705. Retrieved from  
535 <http://www.ncbi.nlm.nih.gov/pubmed/12202754>
- 536 Meistrich, M. L. (2013). Effects of chemotherapy and radiotherapy on spermatogenesis in  
537 humans. *Fertility and Sterility*, 100(5), 1180–1186.  
538 <http://doi.org/10.1016/j.fertnstert.2013.08.010>
- 539 Oakberg, E. F. (1955). Sensitivity and Time of Degeneration of Spermatogenic Cells Irradiated

- 540 in Various Stages of Maturation in the Mouse Sensitivity and Time of Degeneration of  
541 Spermatogenic Cells Irradiated in Various Stages of Maturation in the Mouse; 2.  
542 Source: *Radiation Research*, 2(4), 369–391. Retrieved from  
543 <http://www.jstor.org/stable/3570245>
- 544 Pepling, M. E., de Cuevas, M., & Spradling, A. C. (1999). Germline cysts: a conserved phase of  
545 germ cell development? *Trends in Cell Biology*, 9(7), 257–62.  
546 [http://doi.org/10.1016/S0962-8924\(99\)01594-9](http://doi.org/10.1016/S0962-8924(99)01594-9)
- 547 Peters, M., DeLuca, C., Hirao, A., Stambolic, V., Potter, J., Zhou, L., ... Mak, T. W. (2002).  
548 Chk2 regulates irradiation-induced, p53-mediated apoptosis in *Drosophila*. *Proceedings of*  
549 *the National Academy of Sciences of the United States of America*, 99(17), 11305–10.  
550 <http://doi.org/10.1073/pnas.172382899>
- 551 Song, Y.-H. (2005). *Drosophila melanogaster*: a model for the study of DNA damage checkpoint  
552 response. *Molecules and Cells*, 19(2), 167–79. Retrieved from  
553 <http://www.ncbi.nlm.nih.gov/pubmed/15879698>
- 554 Tain, L. S., Chowdhury, R. B., Tao, R. N., Plun-Favreau, H., Moiso, N., Martins, L. M., ...  
555 Tapon, N. (2009). *Drosophila* HtrA2 is dispensable for apoptosis but acts downstream of  
556 PINK1 independently from Parkin. *Cell Death and Differentiation*, 16(8), 1118–1125.  
557 <http://doi.org/10.1038/cdd.2009.23>
- 558 Takada, S., Collins, E. R., & Kurahashi, K. (2015). The FHA domain determines *Drosophila*  
559 Chk2/Mnk localization to key mitotic structures and is essential for early embryonic DNA  
560 damage responses. *Molecular Biology of the Cell*, 26(10), 1811–28.  
561 <http://doi.org/10.1091/mbc.E14-07-1238>
- 562 Takada, S., Kelkar, A., & Theurkauf, W. E. (2003). *Drosophila* Checkpoint Kinase 2 Couples  
563 Centrosome Function and Spindle Assembly to Genomic Integrity. *Cell*, 113(1), 87–99.  
564 [http://doi.org/10.1016/S0092-8674\(03\)00202-2](http://doi.org/10.1016/S0092-8674(03)00202-2)
- 565 Ulsh, B. A. (2010). CHECKING THE FOUNDATION: RECENT RADIOBIOLOGY AND  
566 THE LINEAR NO-THRESHOLD THEORY. *Health Physics*, 99(6), 747–758.  
567 <http://doi.org/10.1097/HP.0b013e3181e32477>
- 568 Van Doren, M., Williamson, A. L., & Lehmann, R. (1998). *Regulation of zygotic gene*  
569 *expression in Drosophila primordial germ cells*. *Current Biology* (Vol. 8). Retrieved from  
570 <http://www.sciencedirect.com/science/article/pii/S0960982298700910>
- 571 Vande Walle, L., Lamkanfi, M., & Vandenabeele, P. (2008). The mitochondrial serine protease  
572 HtrA2/Omi: an overview. *Cell Death and Differentiation*, 15(3), 453–460.  
573 <http://doi.org/10.1038/sj.cdd.4402291>
- 574 Wichmann, A., Jaklevic, B., & Su, T. T. (2006). Ionizing radiation induces caspase-dependent  
575 but Chk2- and p53-independent cell death in *Drosophila melanogaster*. *Proceedings of the*  
576 *National Academy of Sciences of the United States of America*, 103(26), 9952–7.  
577 <http://doi.org/10.1073/pnas.0510528103>
- 578 Wylie, A., Lu, W.-J., D’Brot, A., Buszczak, M., Abrams, J. M., Abdu, U., ... Xu, Y. (2014). p53  
579 activity is selectively licensed in the *Drosophila* stem cell compartment. *eLife*, 3, e01530.

580 <http://doi.org/10.7554/eLife.01530>

581 Xie, H. B., & Golic, K. G. (2004). Gene deletions by ends-in targeting in *Drosophila*  
582 *melanogaster*. *Genetics*, 168(3), 1477–89. <http://doi.org/10.1534/genetics.104.030882>

583 Yacobi-Sharon, K., Namdar, Y., & Arama, E. (2013). Alternative germ cell death pathway in  
584 *Drosophila* involves HtrA2/Omi, lysosomes, and a caspase-9 counterpart. *Developmental*  
585 *Cell*, 25(1), 29–42. <http://doi.org/10.1016/j.devcel.2013.02.002>

586 Yang, H., & Yamashita, Y. M. (2015). The regulated elimination of transit-amplifying cells  
587 preserves tissue homeostasis during protein starvation in *Drosophila* testis. *Development*  
588 *(Cambridge, England)*, 142(10), 1756–66. <http://doi.org/10.1242/dev.122663>

589 Yoshida, S. (2016). From cyst to tubule: innovations in vertebrate spermatogenesis. *Wiley*  
590 *Interdisciplinary Reviews: Developmental Biology*, 5(1), 119–131.  
591 <http://doi.org/10.1002/wdev.204>

592 Yuan, H., Chiang, C.-Y. A., Cheng, J., Salzmann, V., & Yamashita, Y. M. (2012). Regulation of  
593 cyclin A localization downstream of Par-1 function is critical for the centrosome orientation  
594 checkpoint in *Drosophila* male germline stem cells. *Developmental Biology*, 361(1), 57–67.  
595 <http://doi.org/10.1016/j.ydbio.2011.10.010>

596

597

598



Figure 1

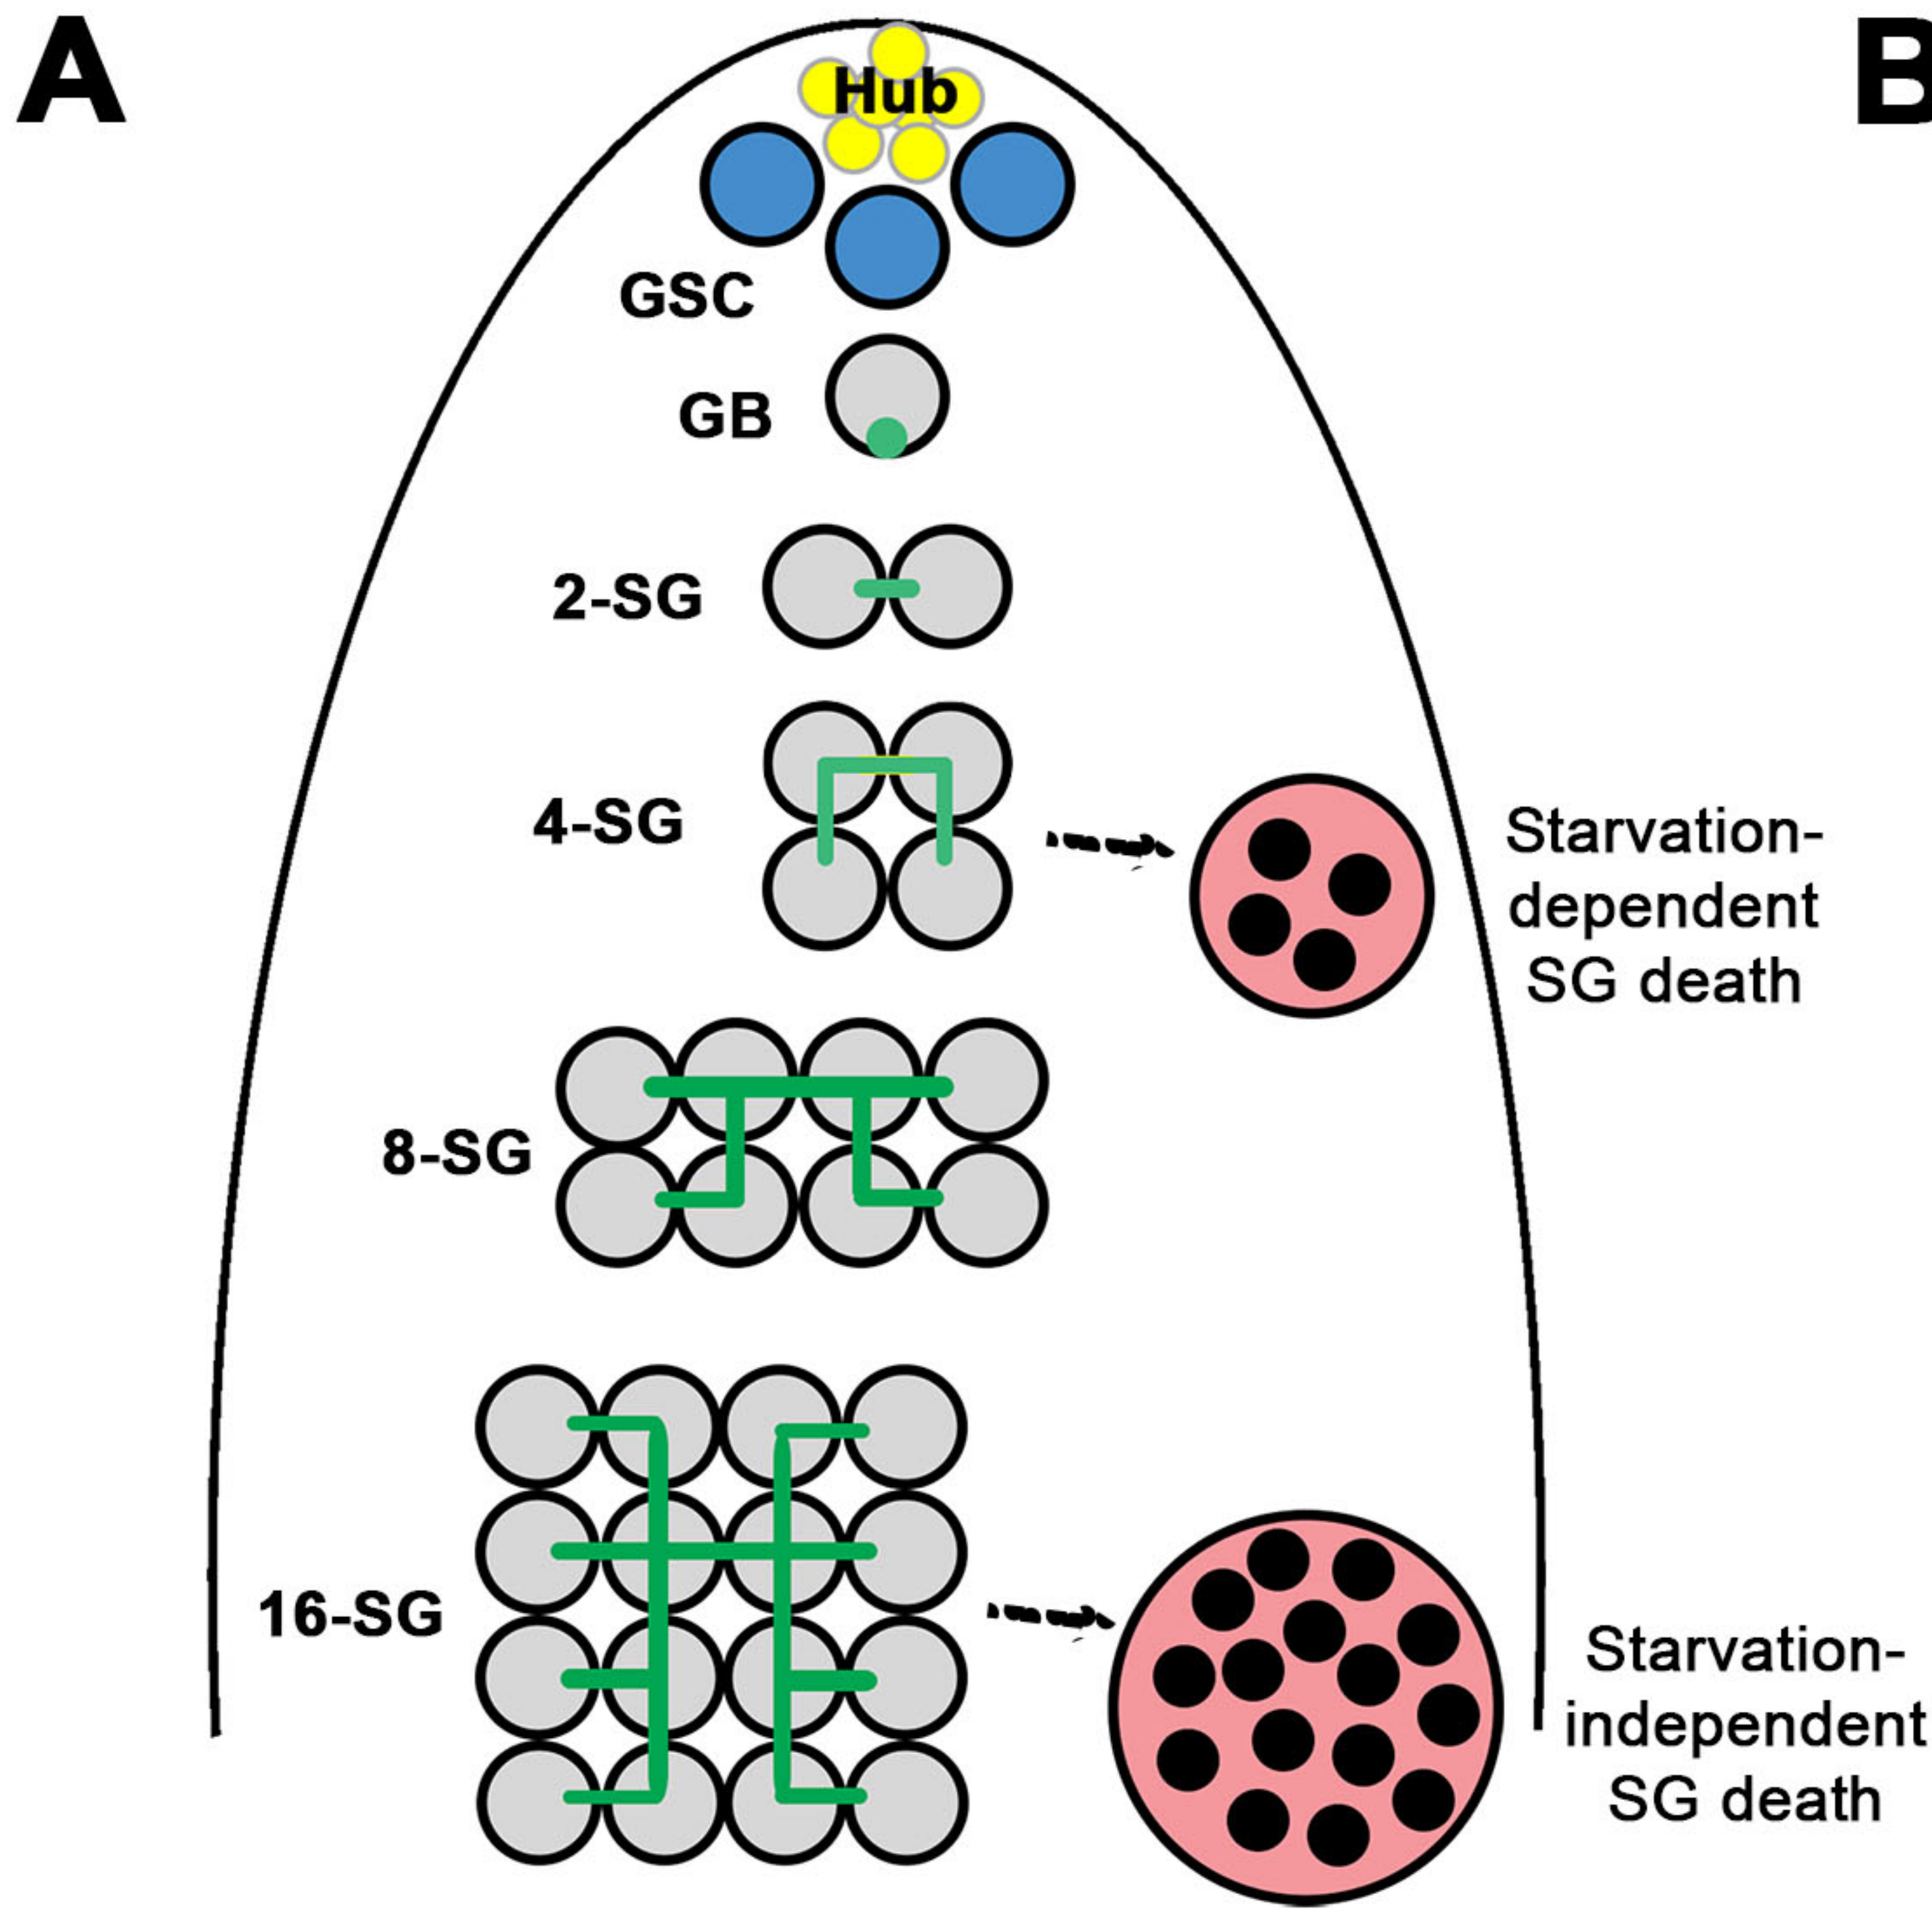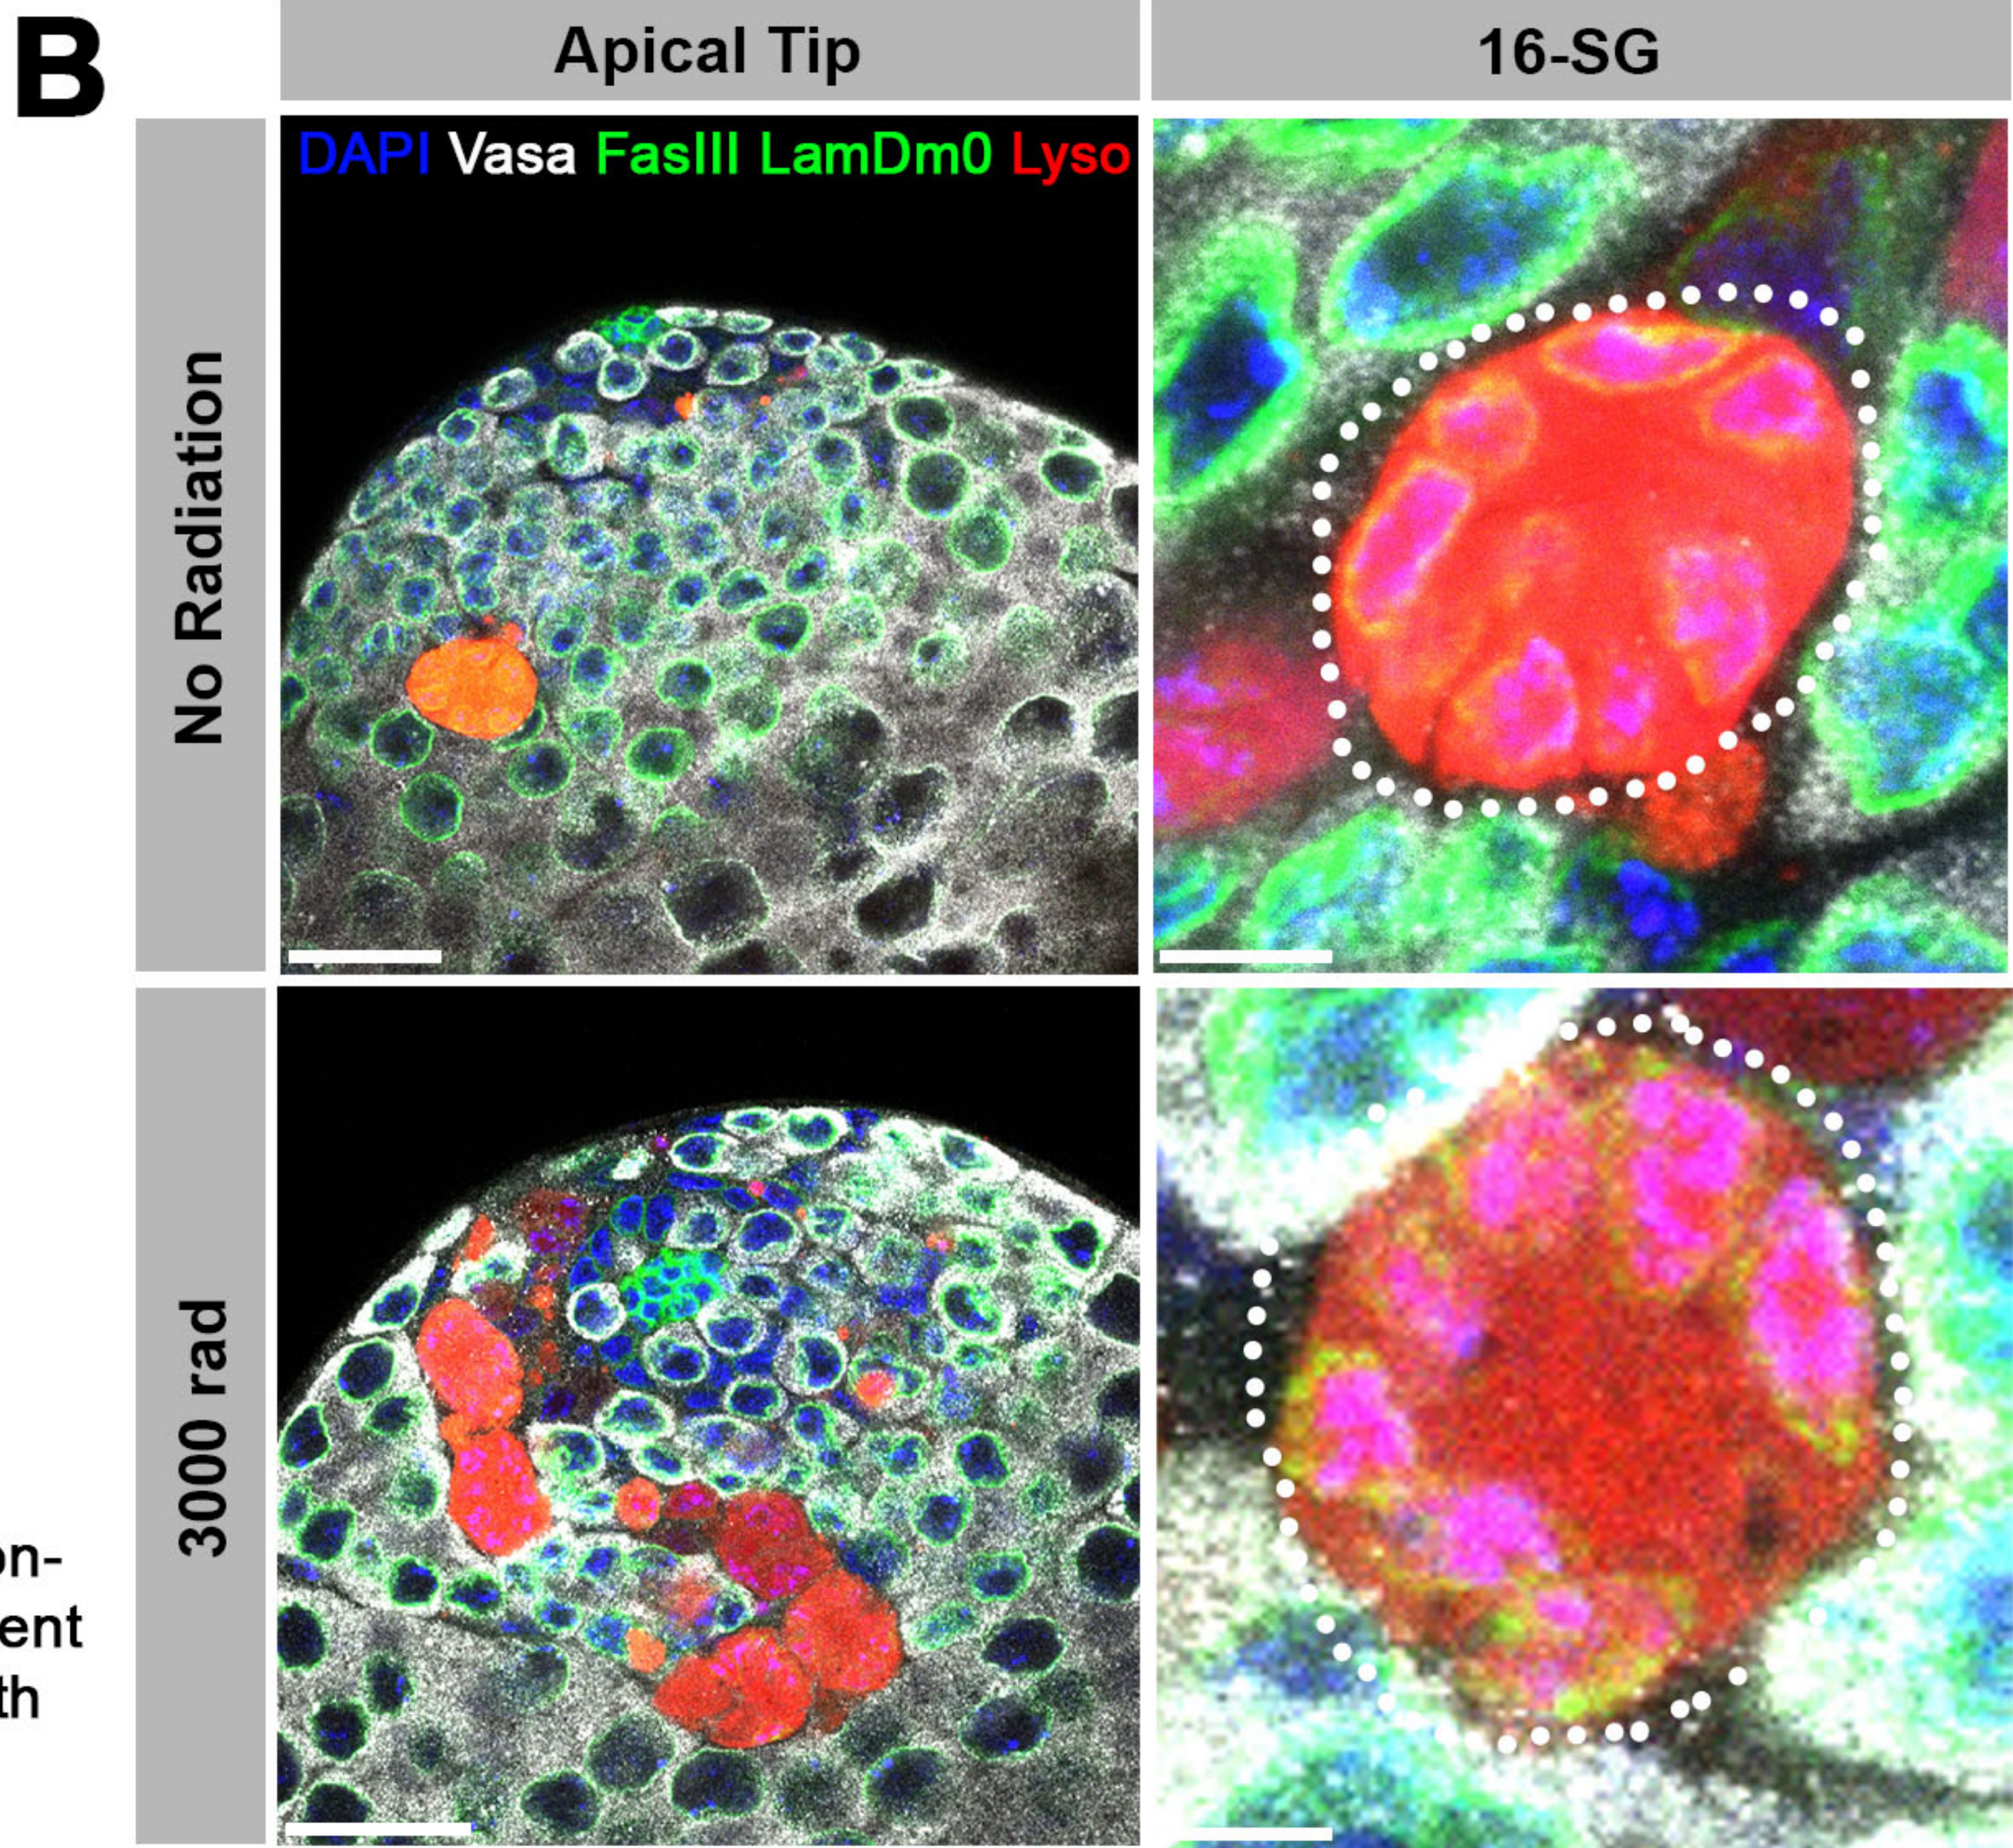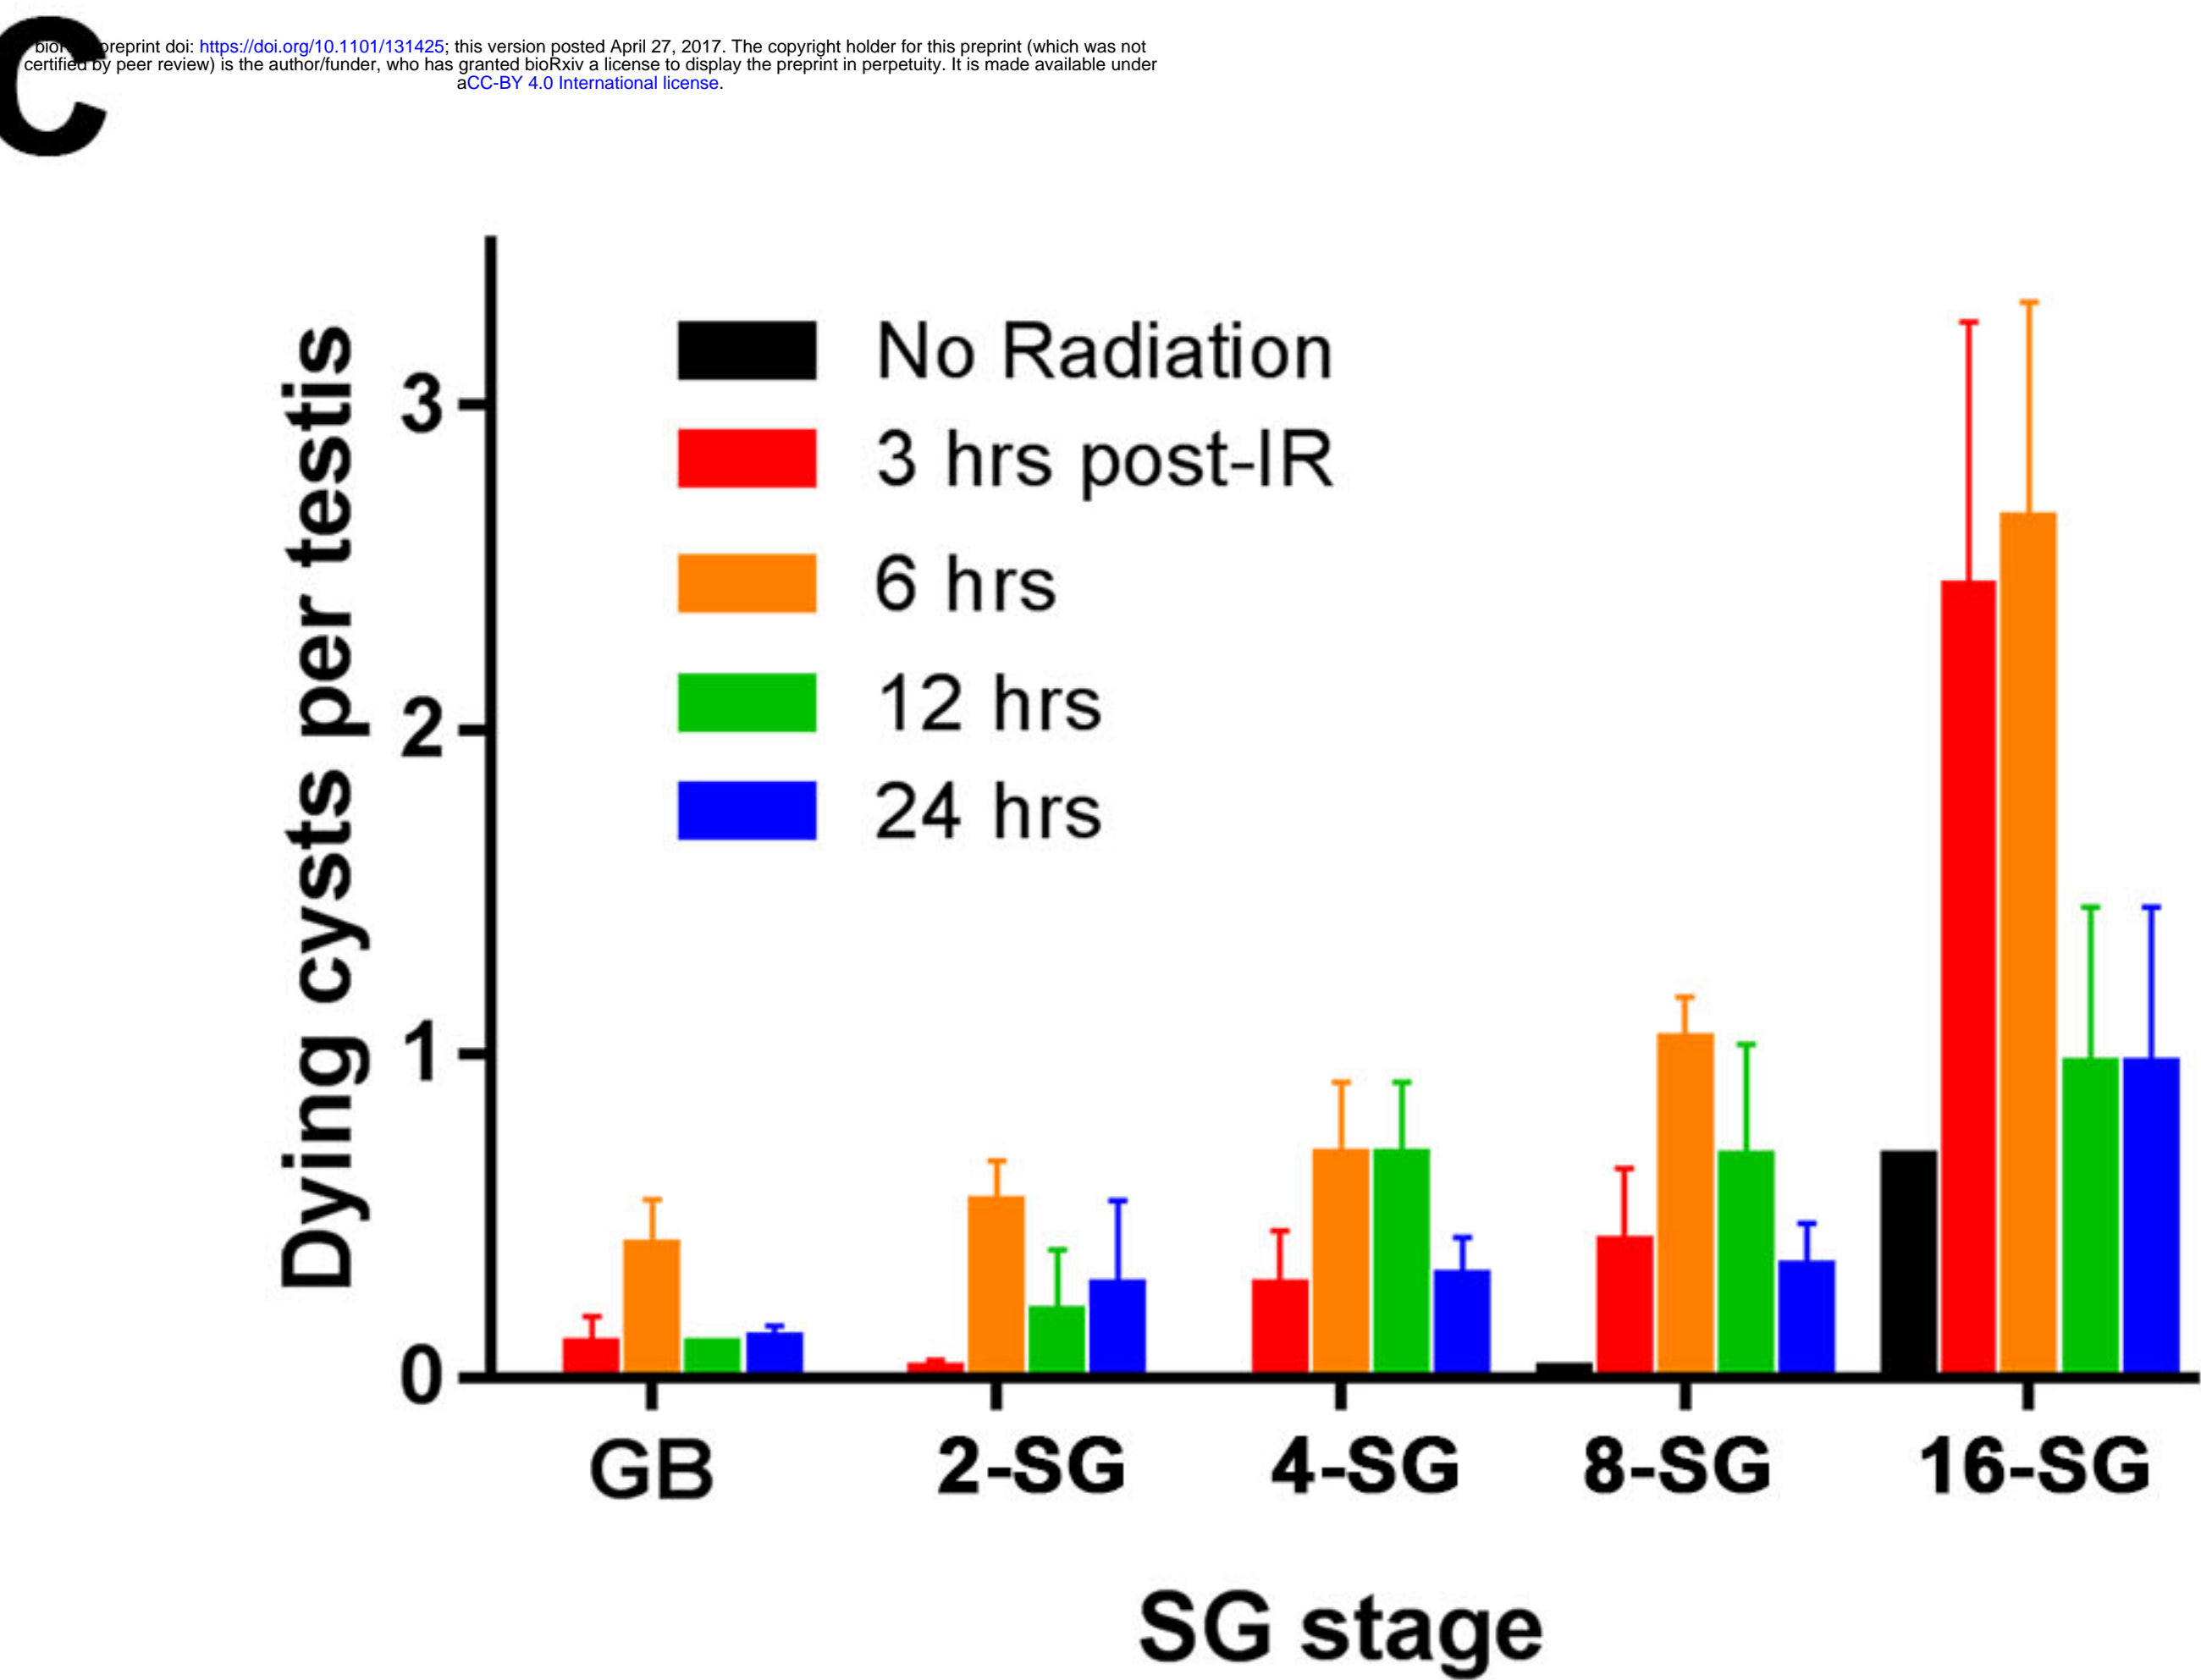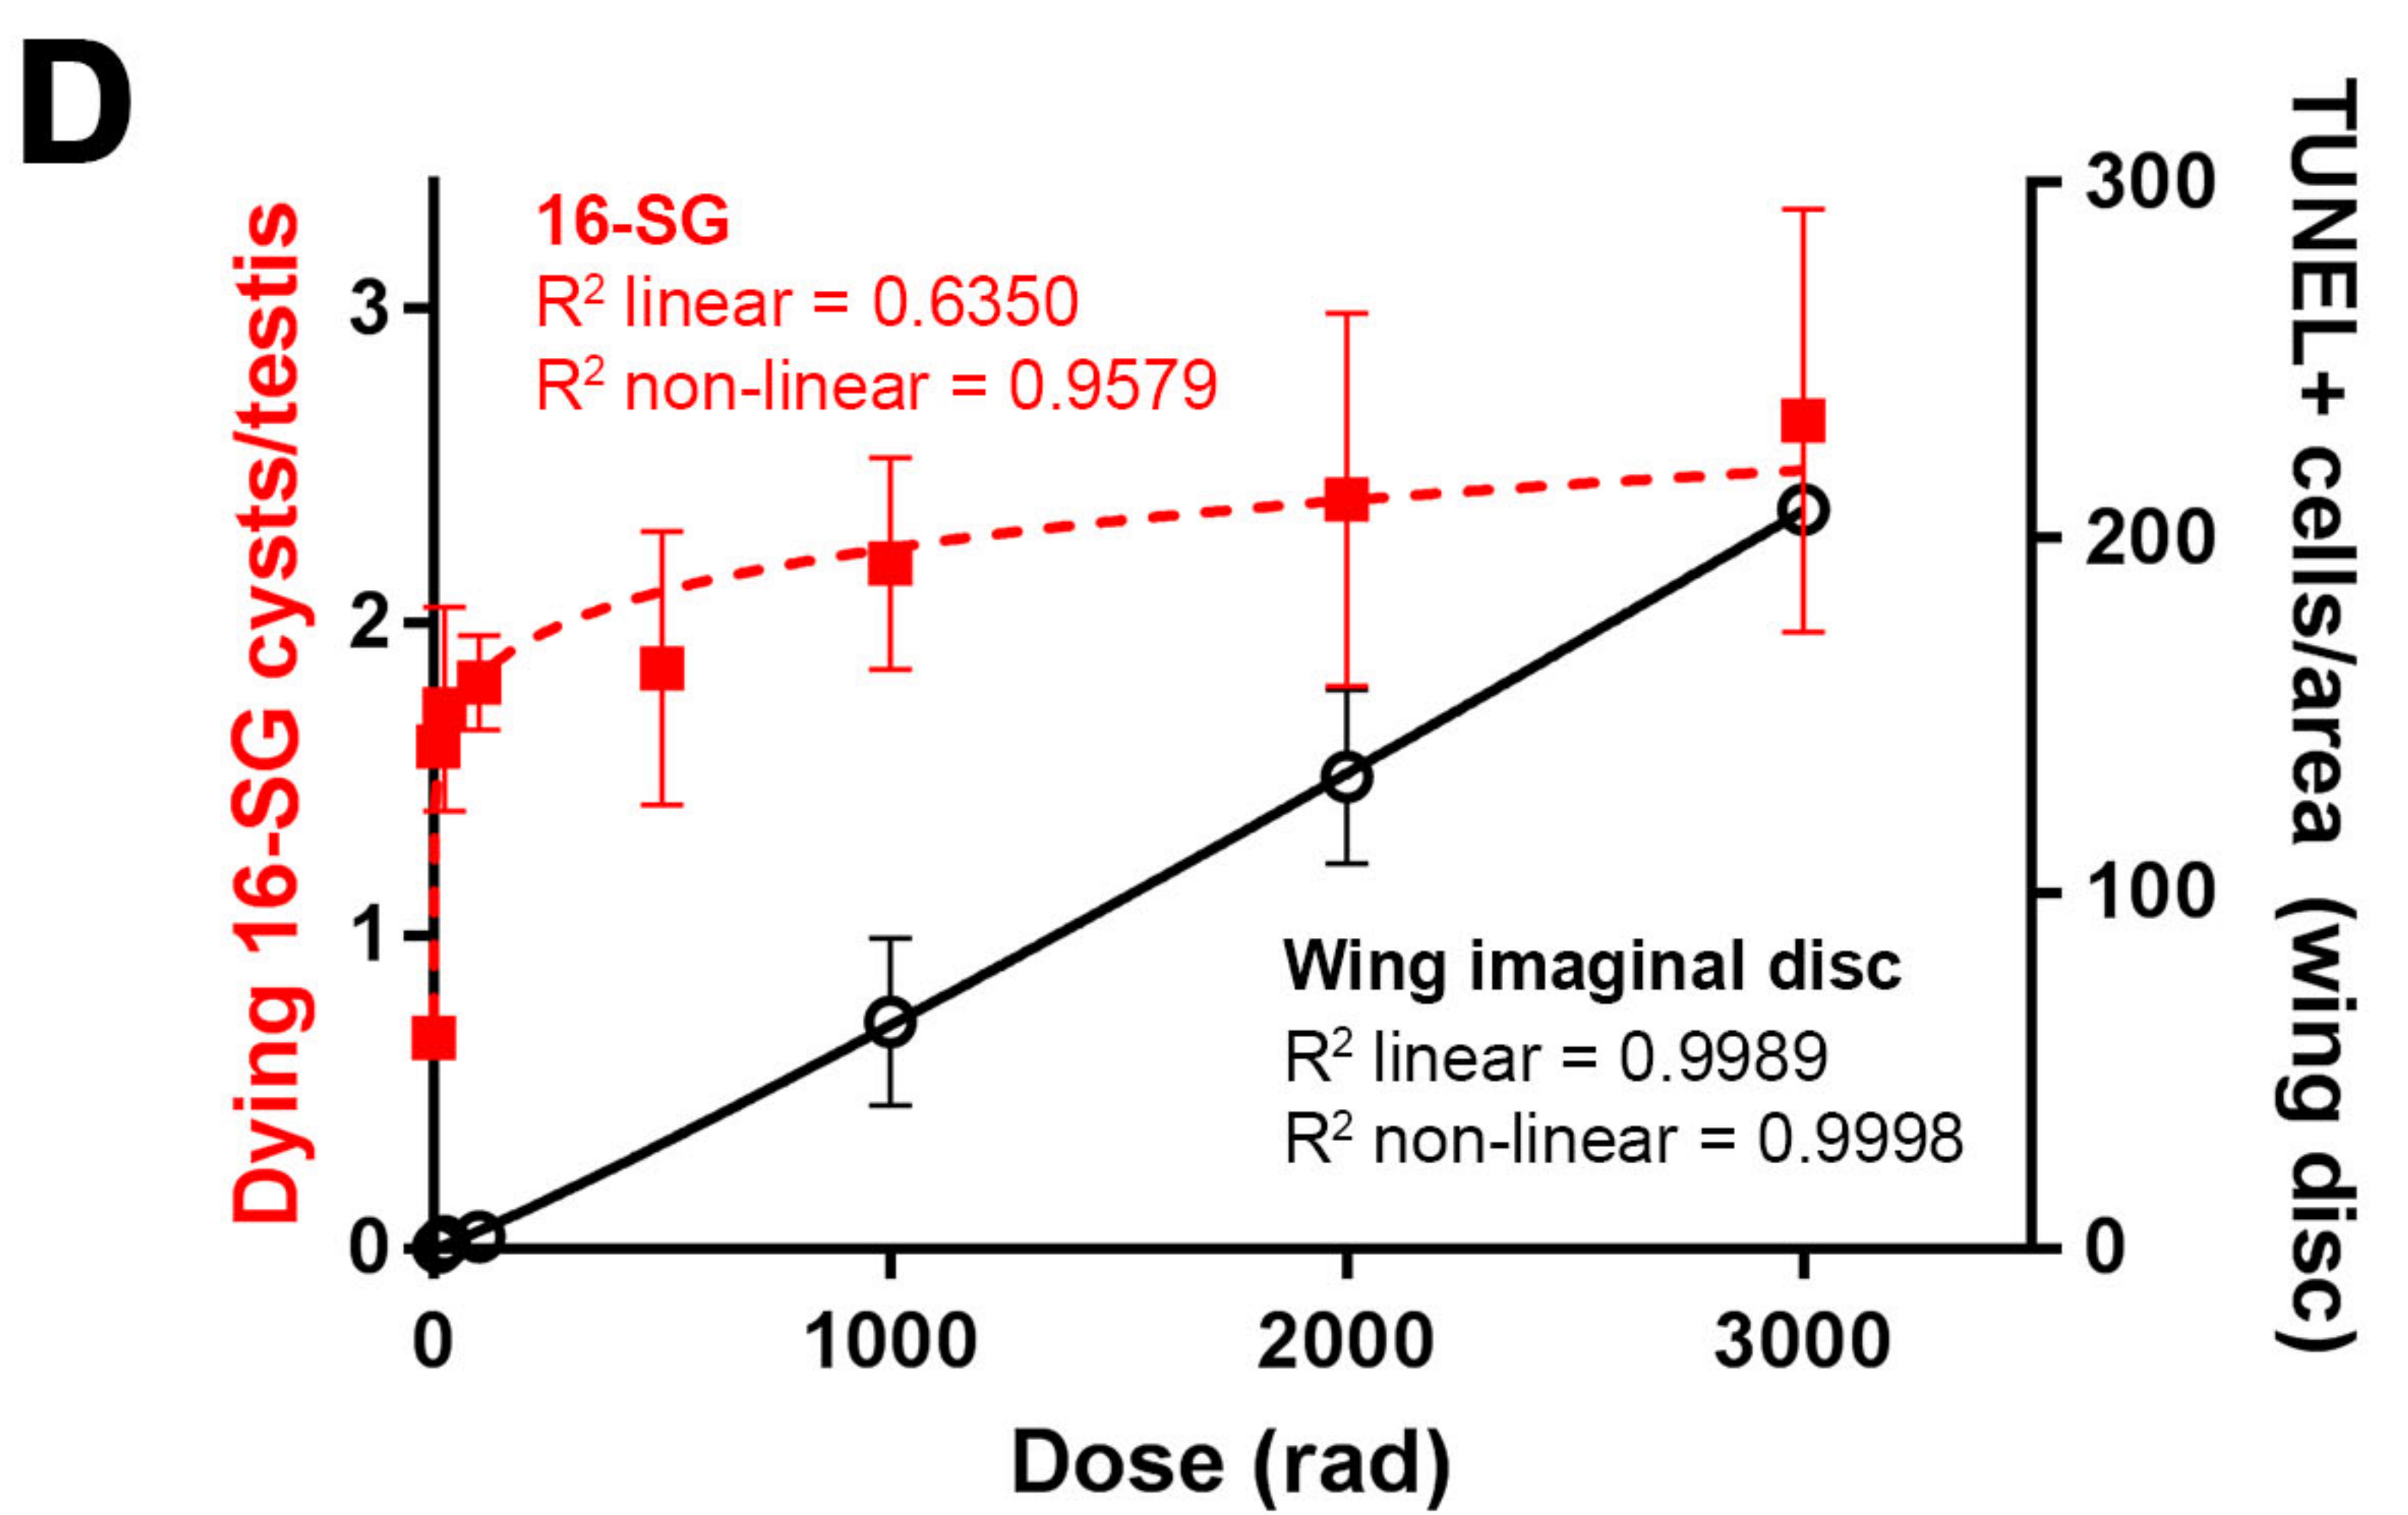



Figure 2

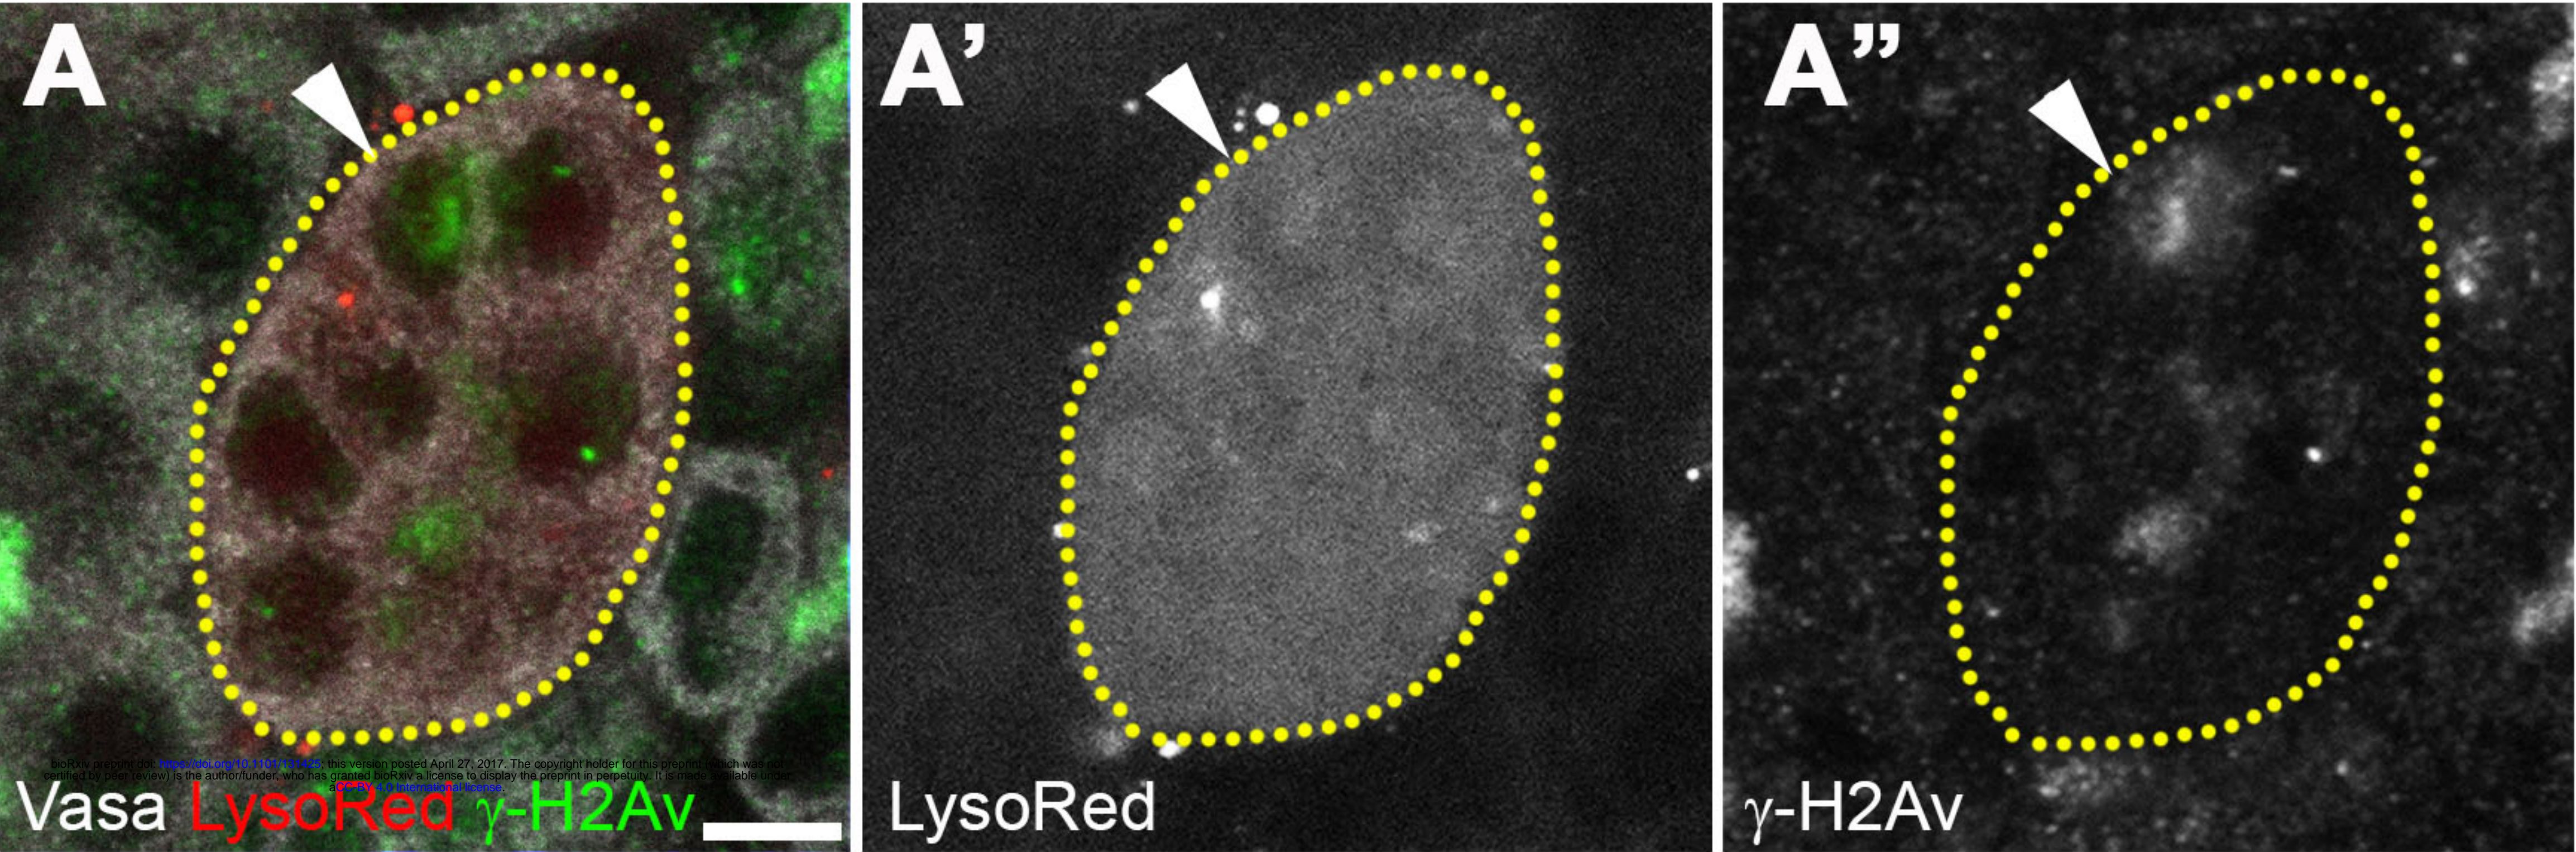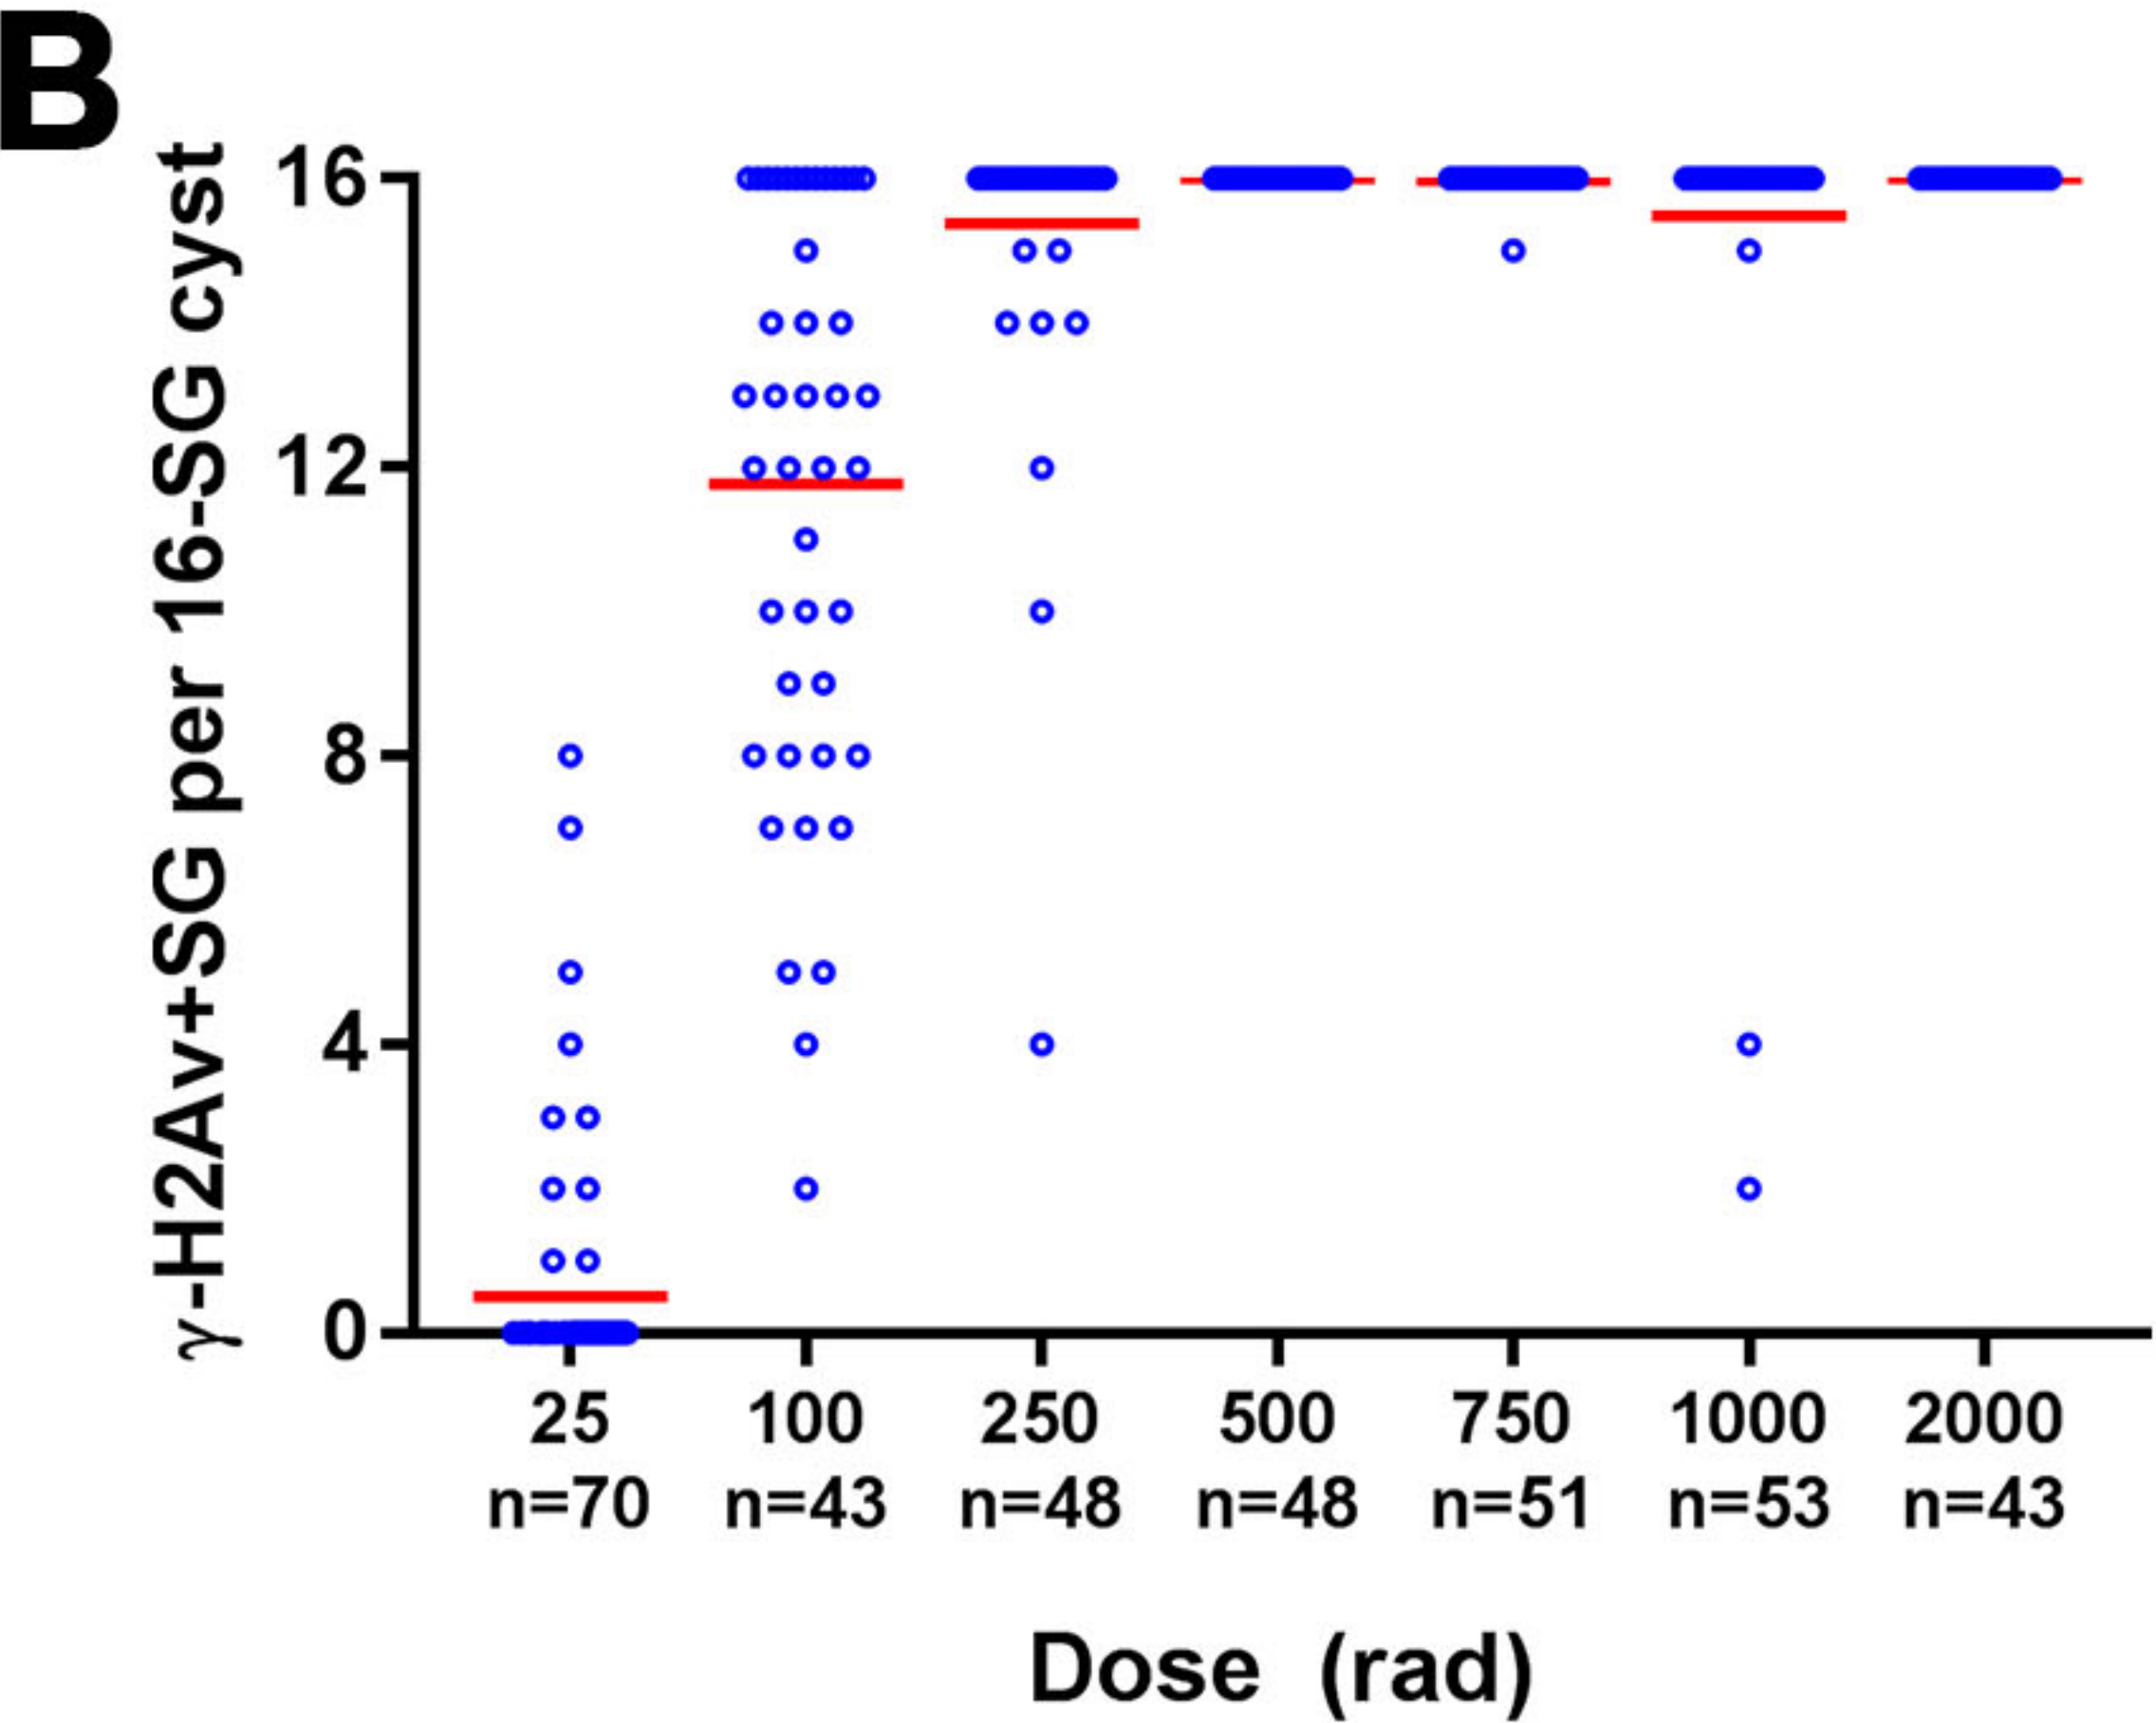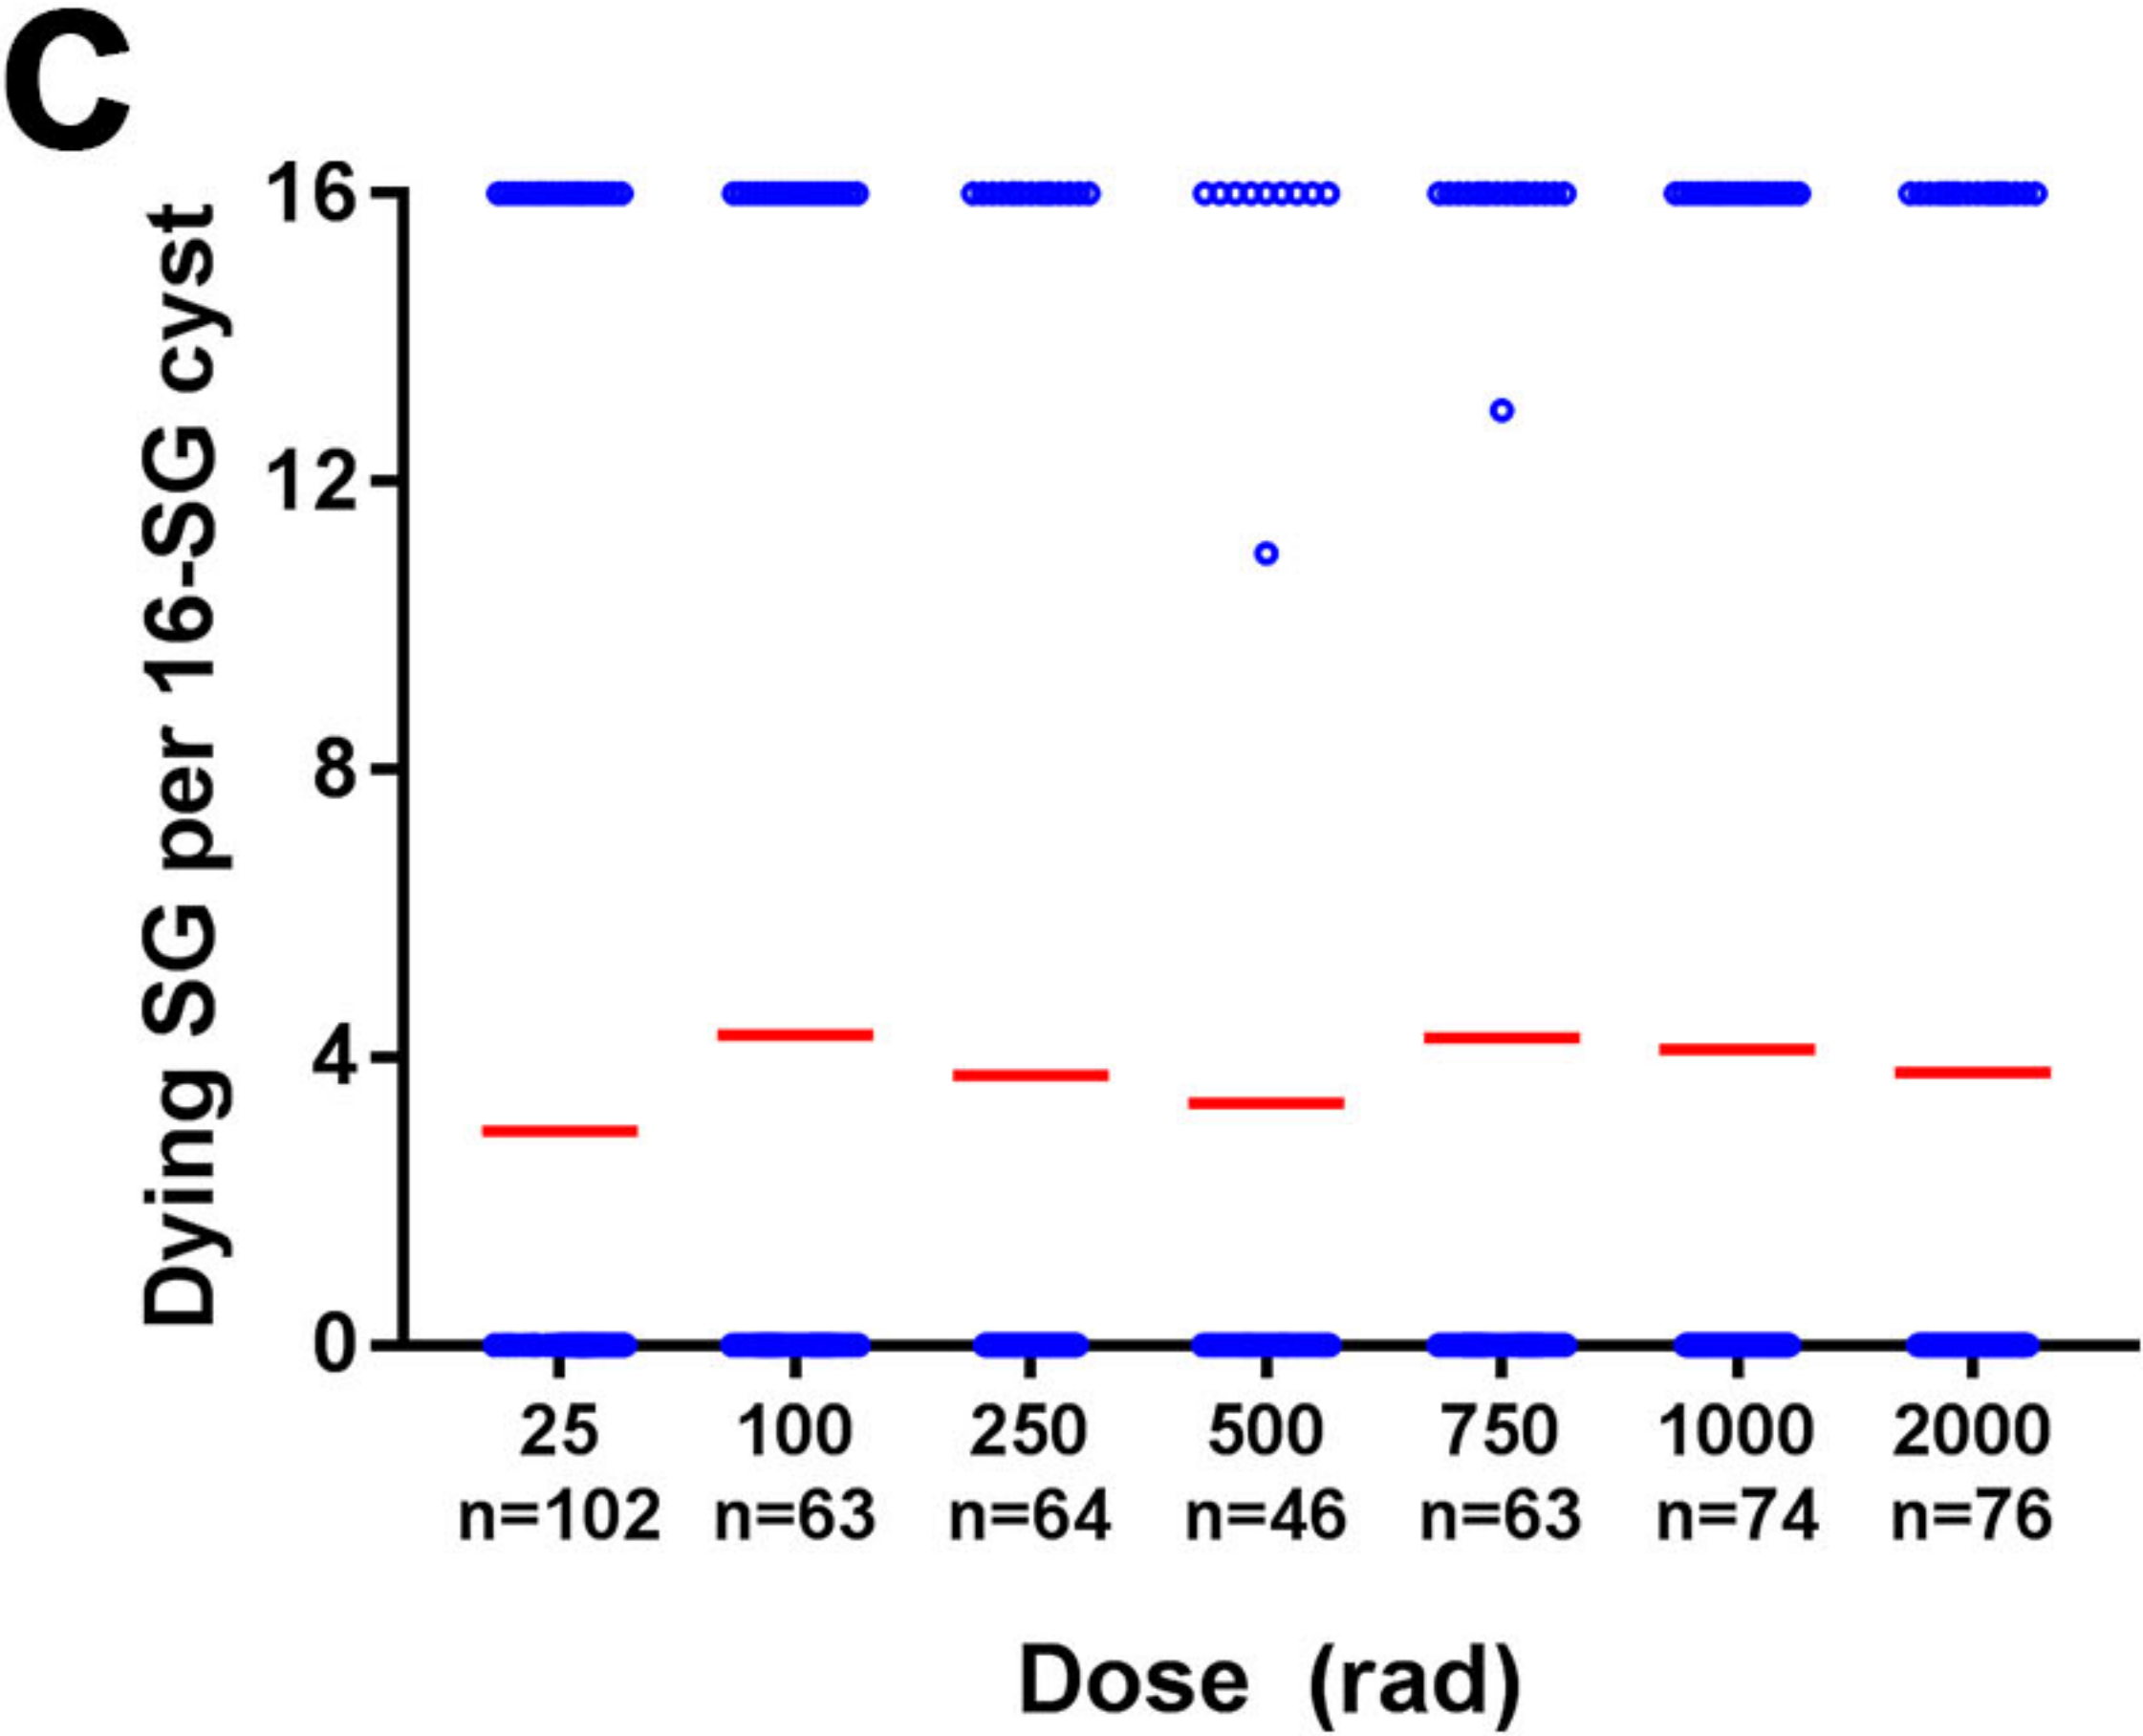



Figure 3

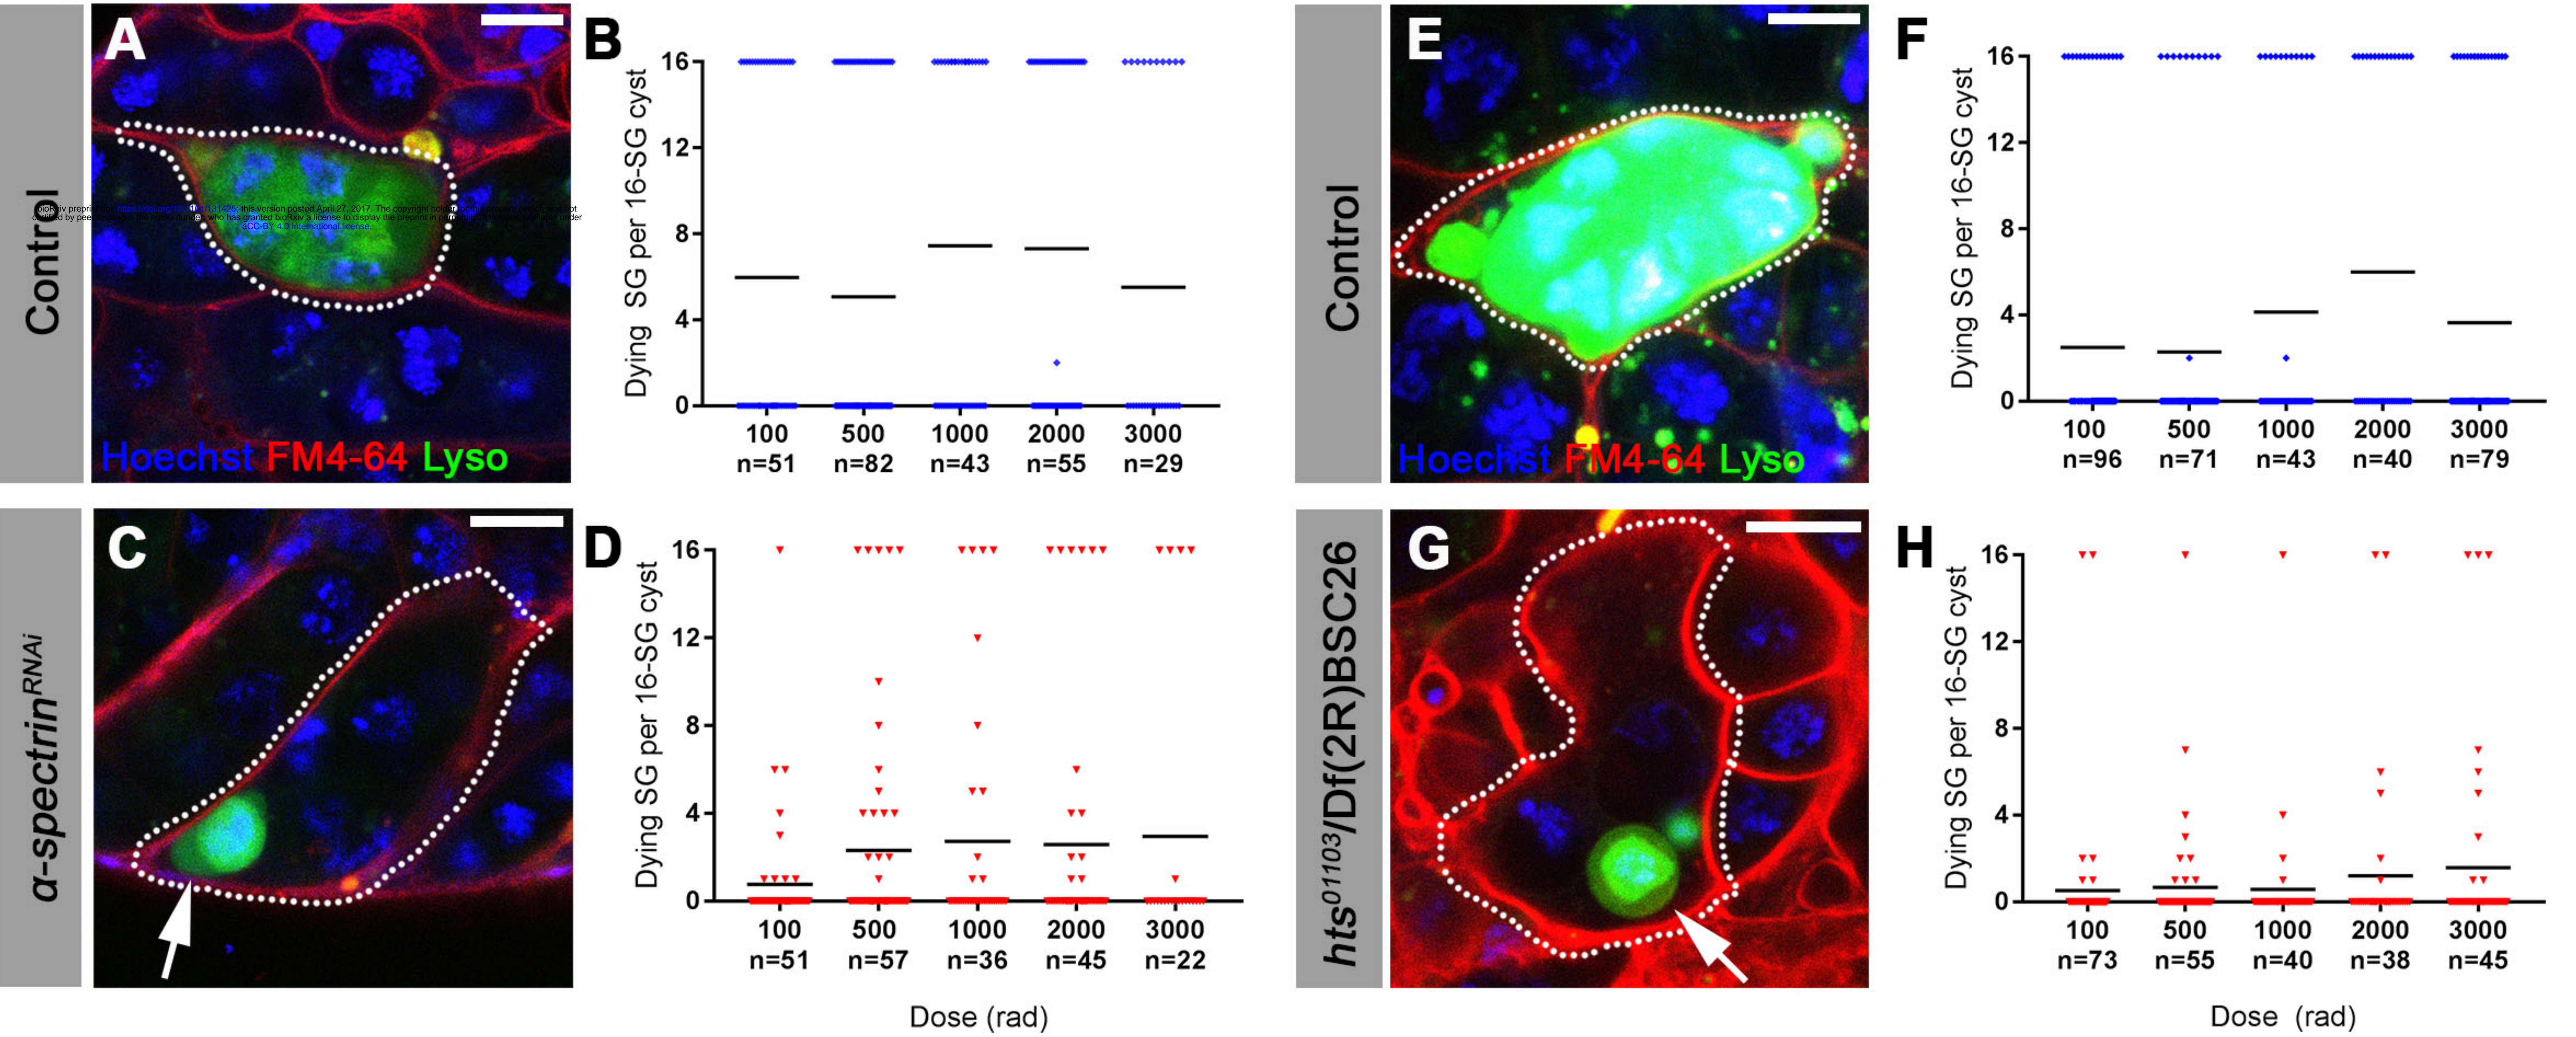



Figure 4

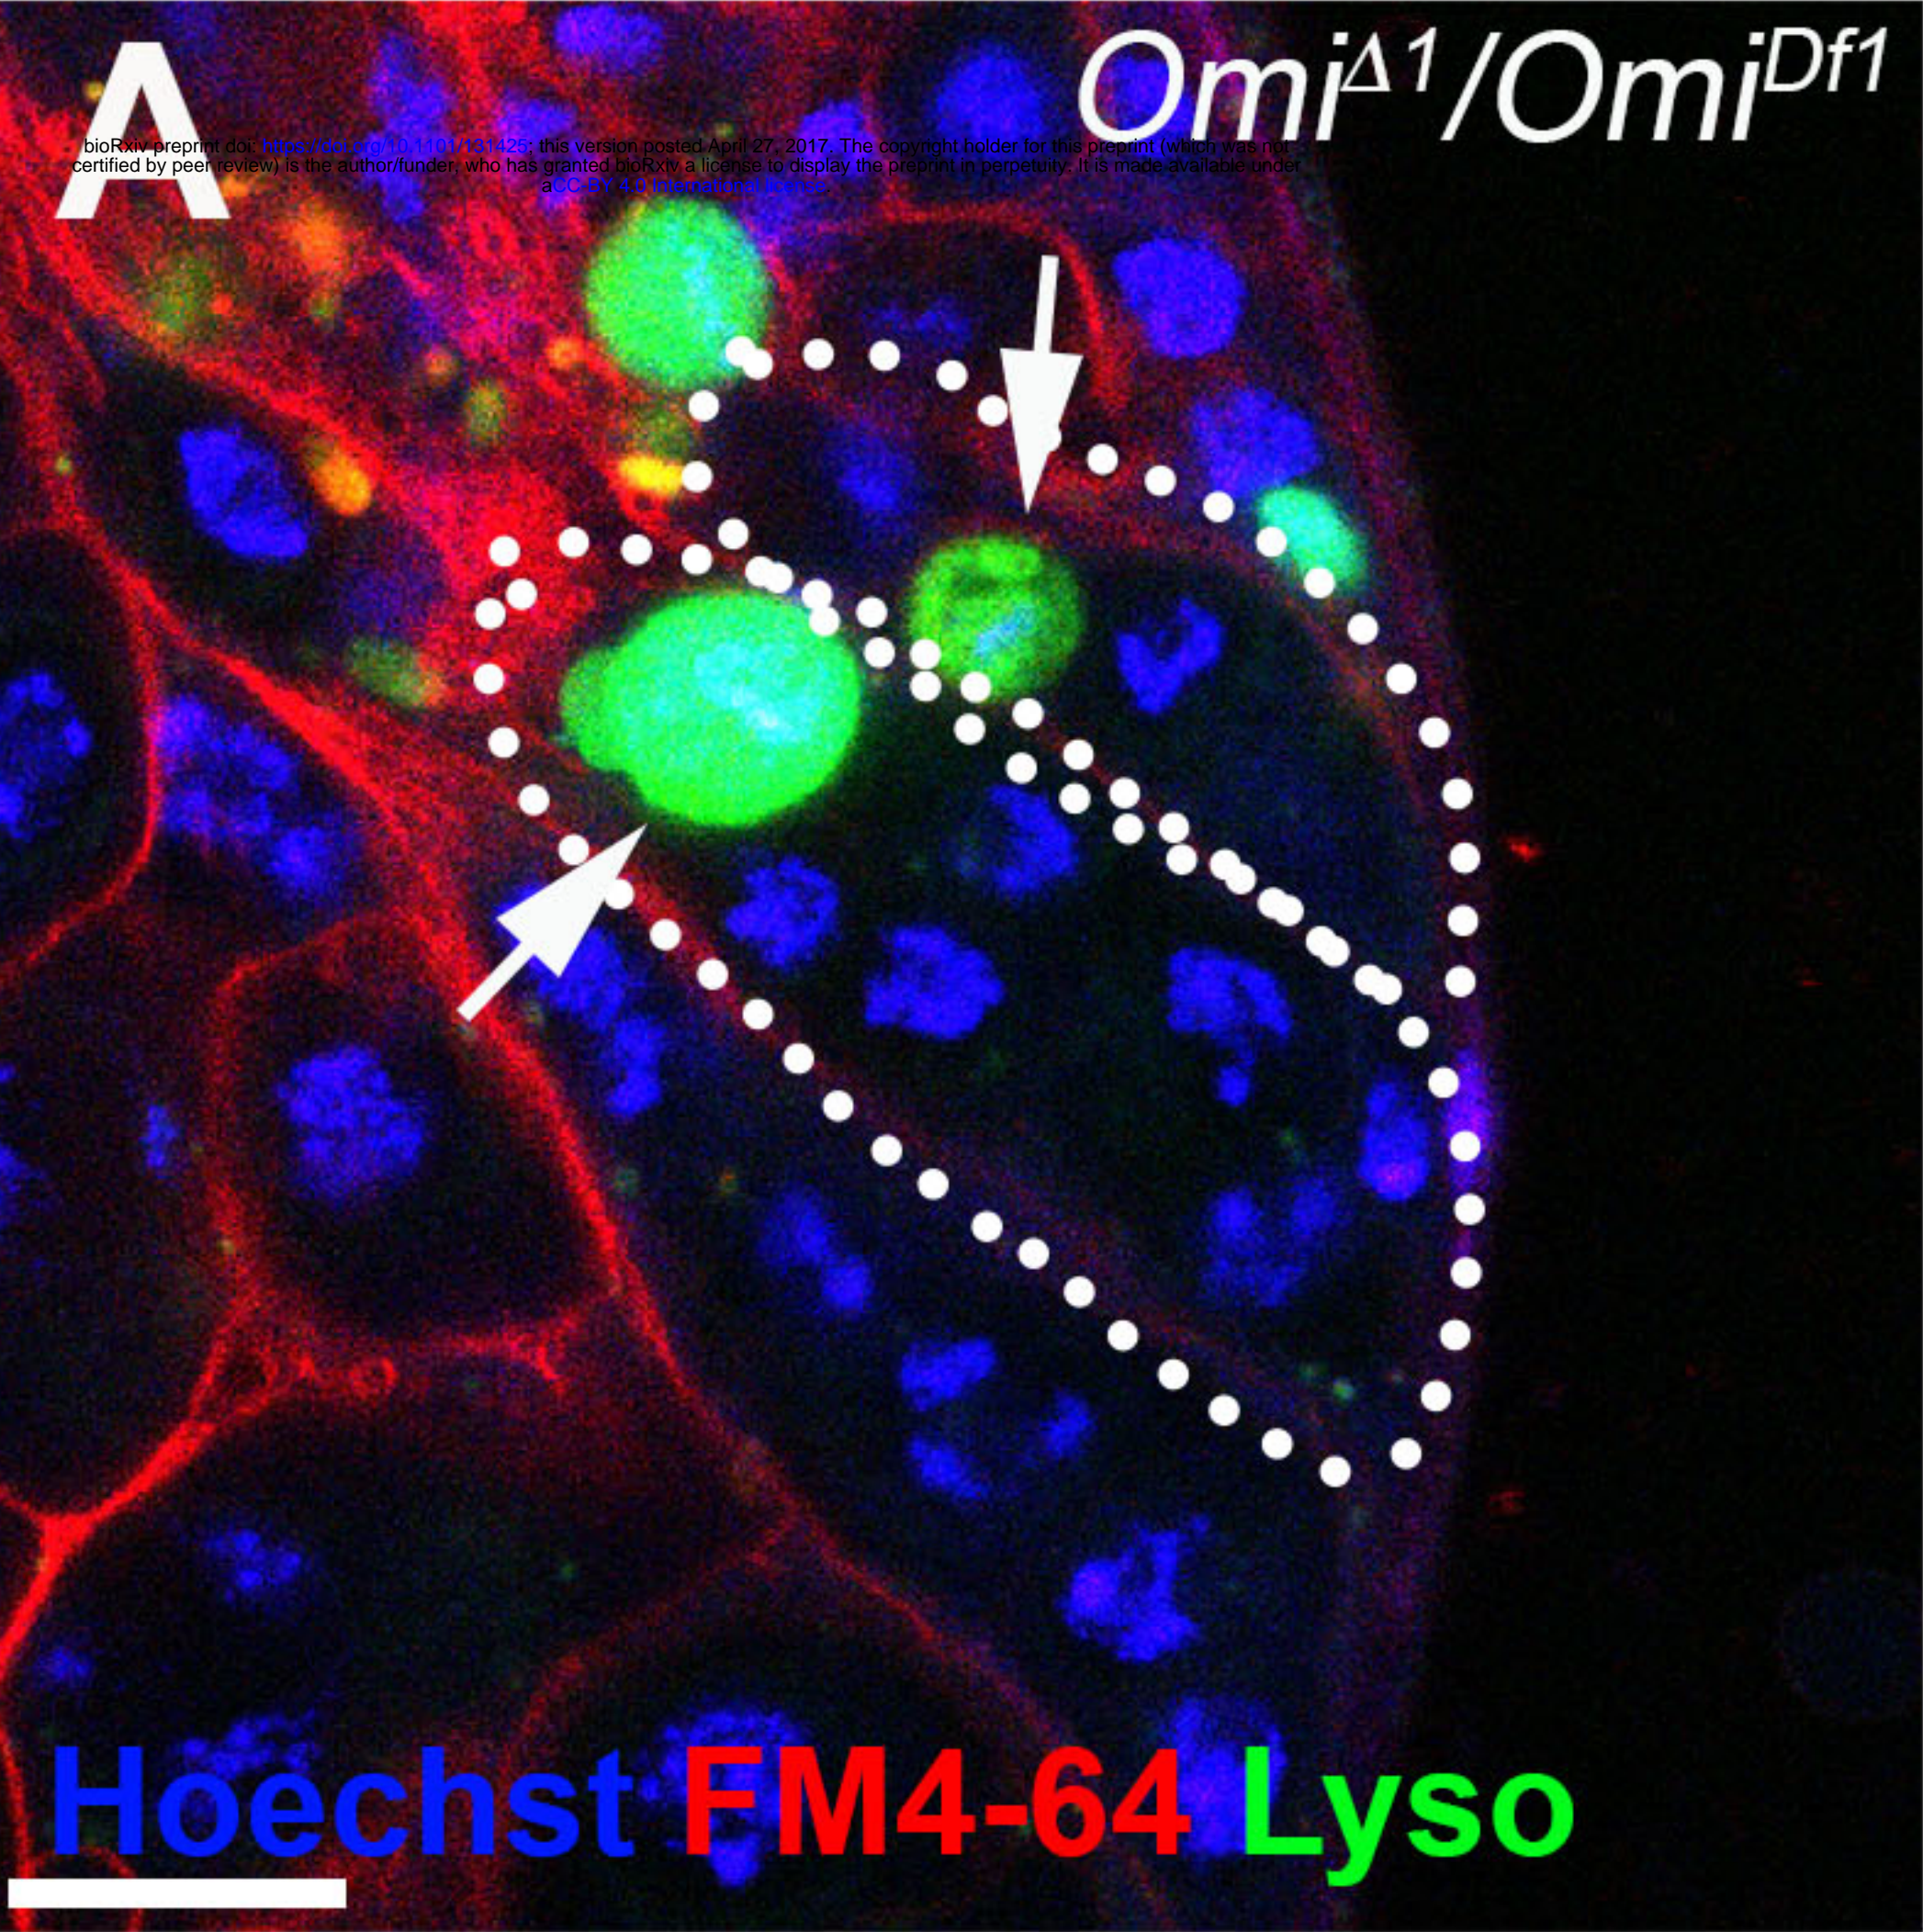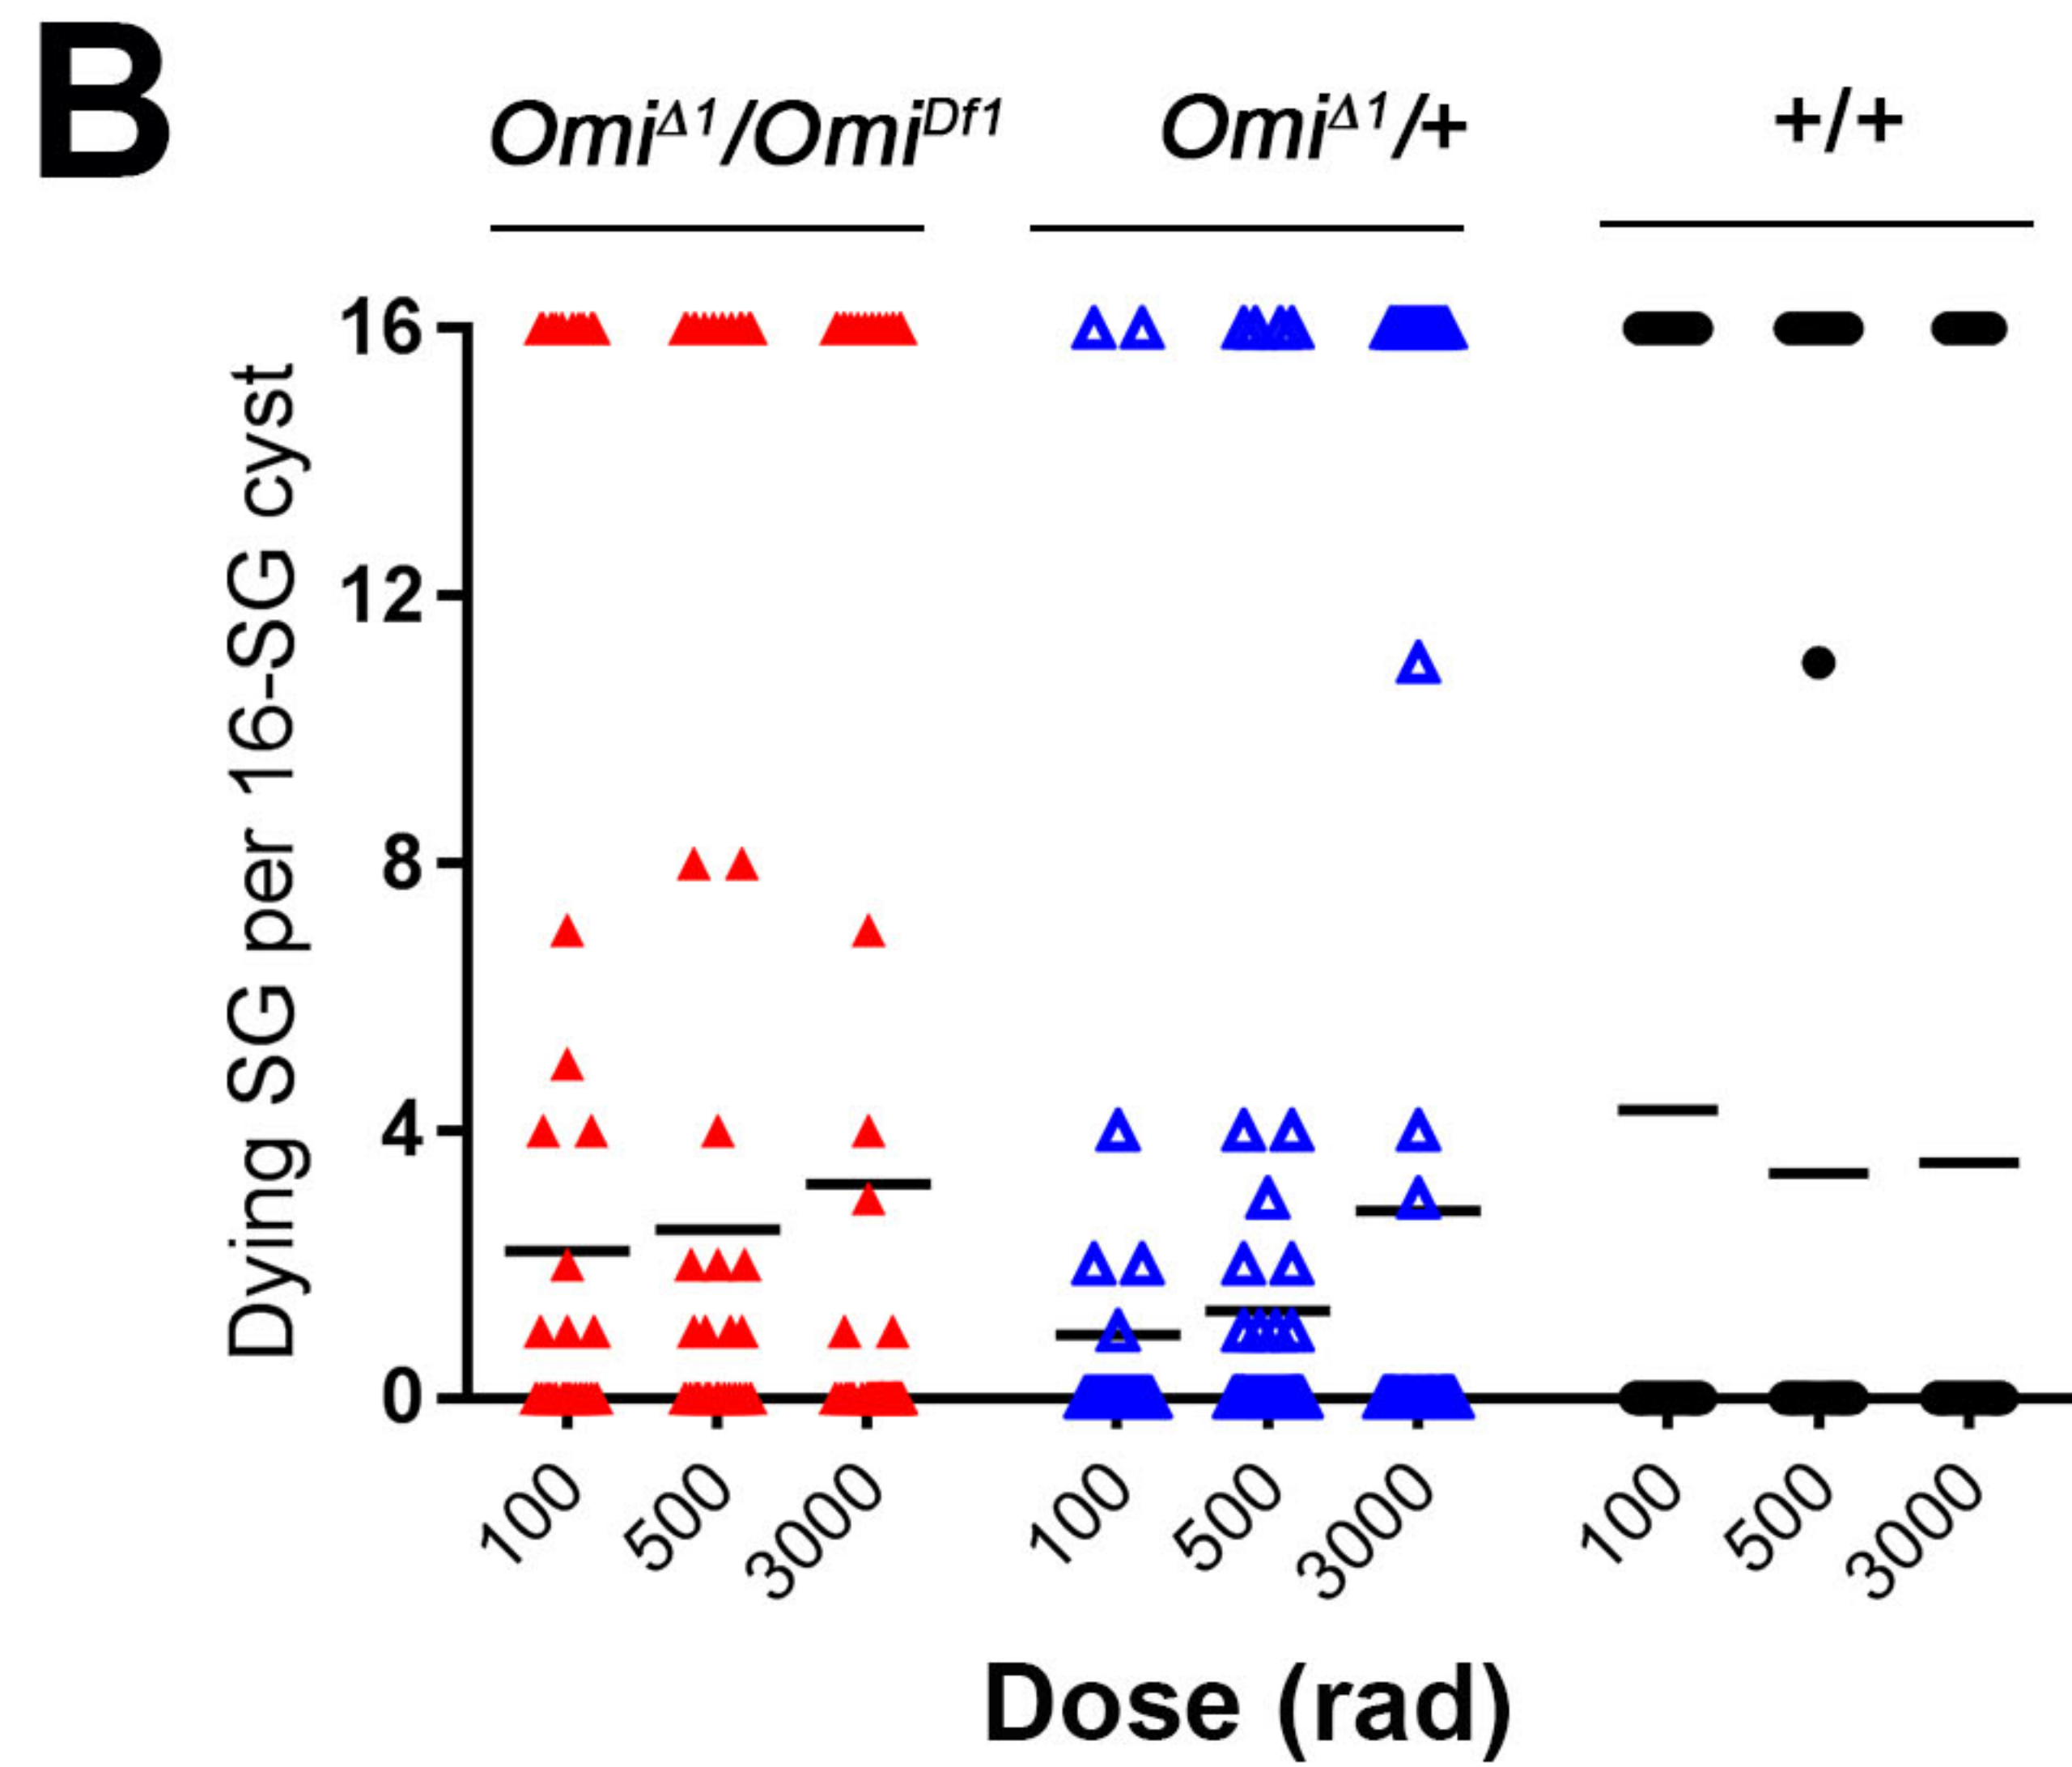



Figure 5

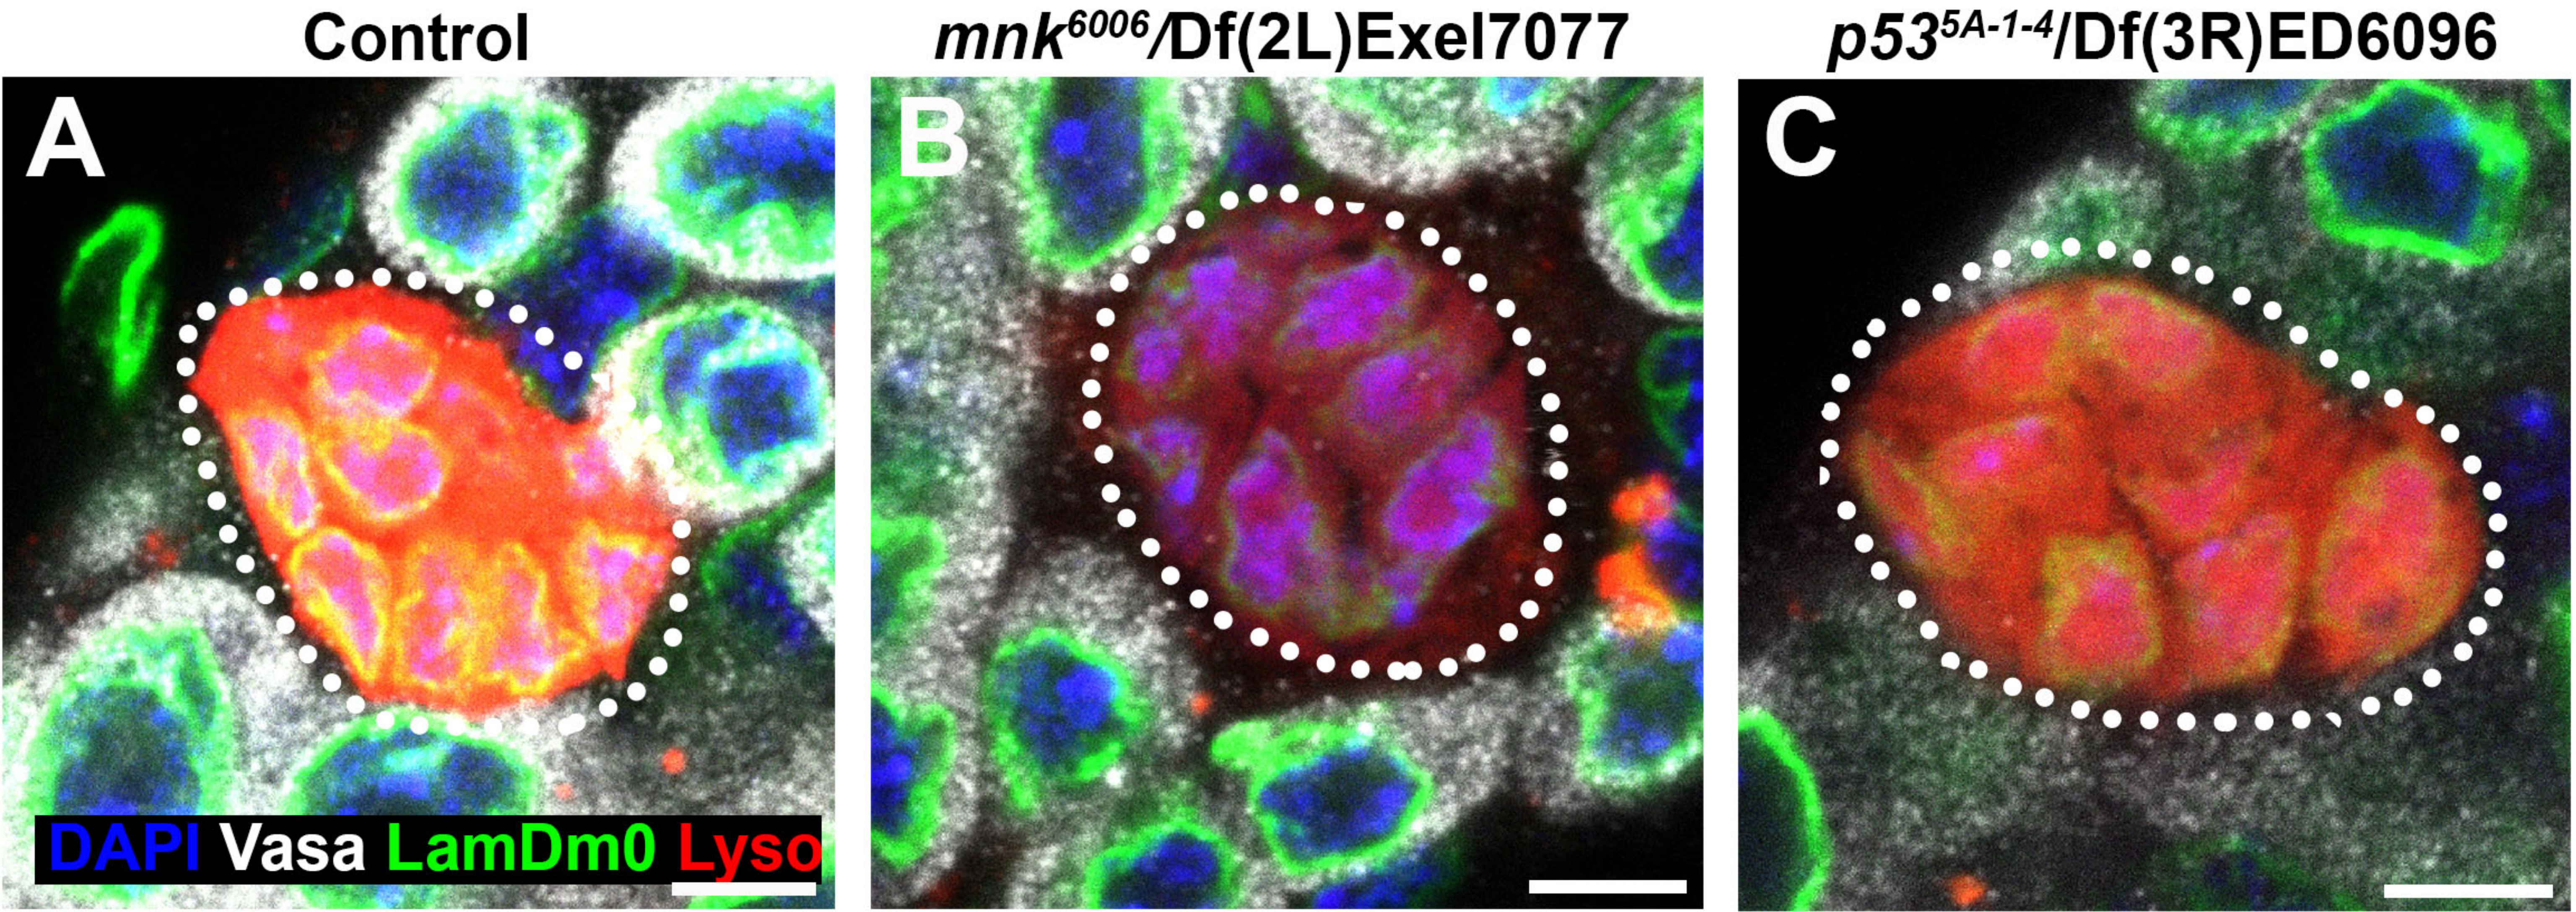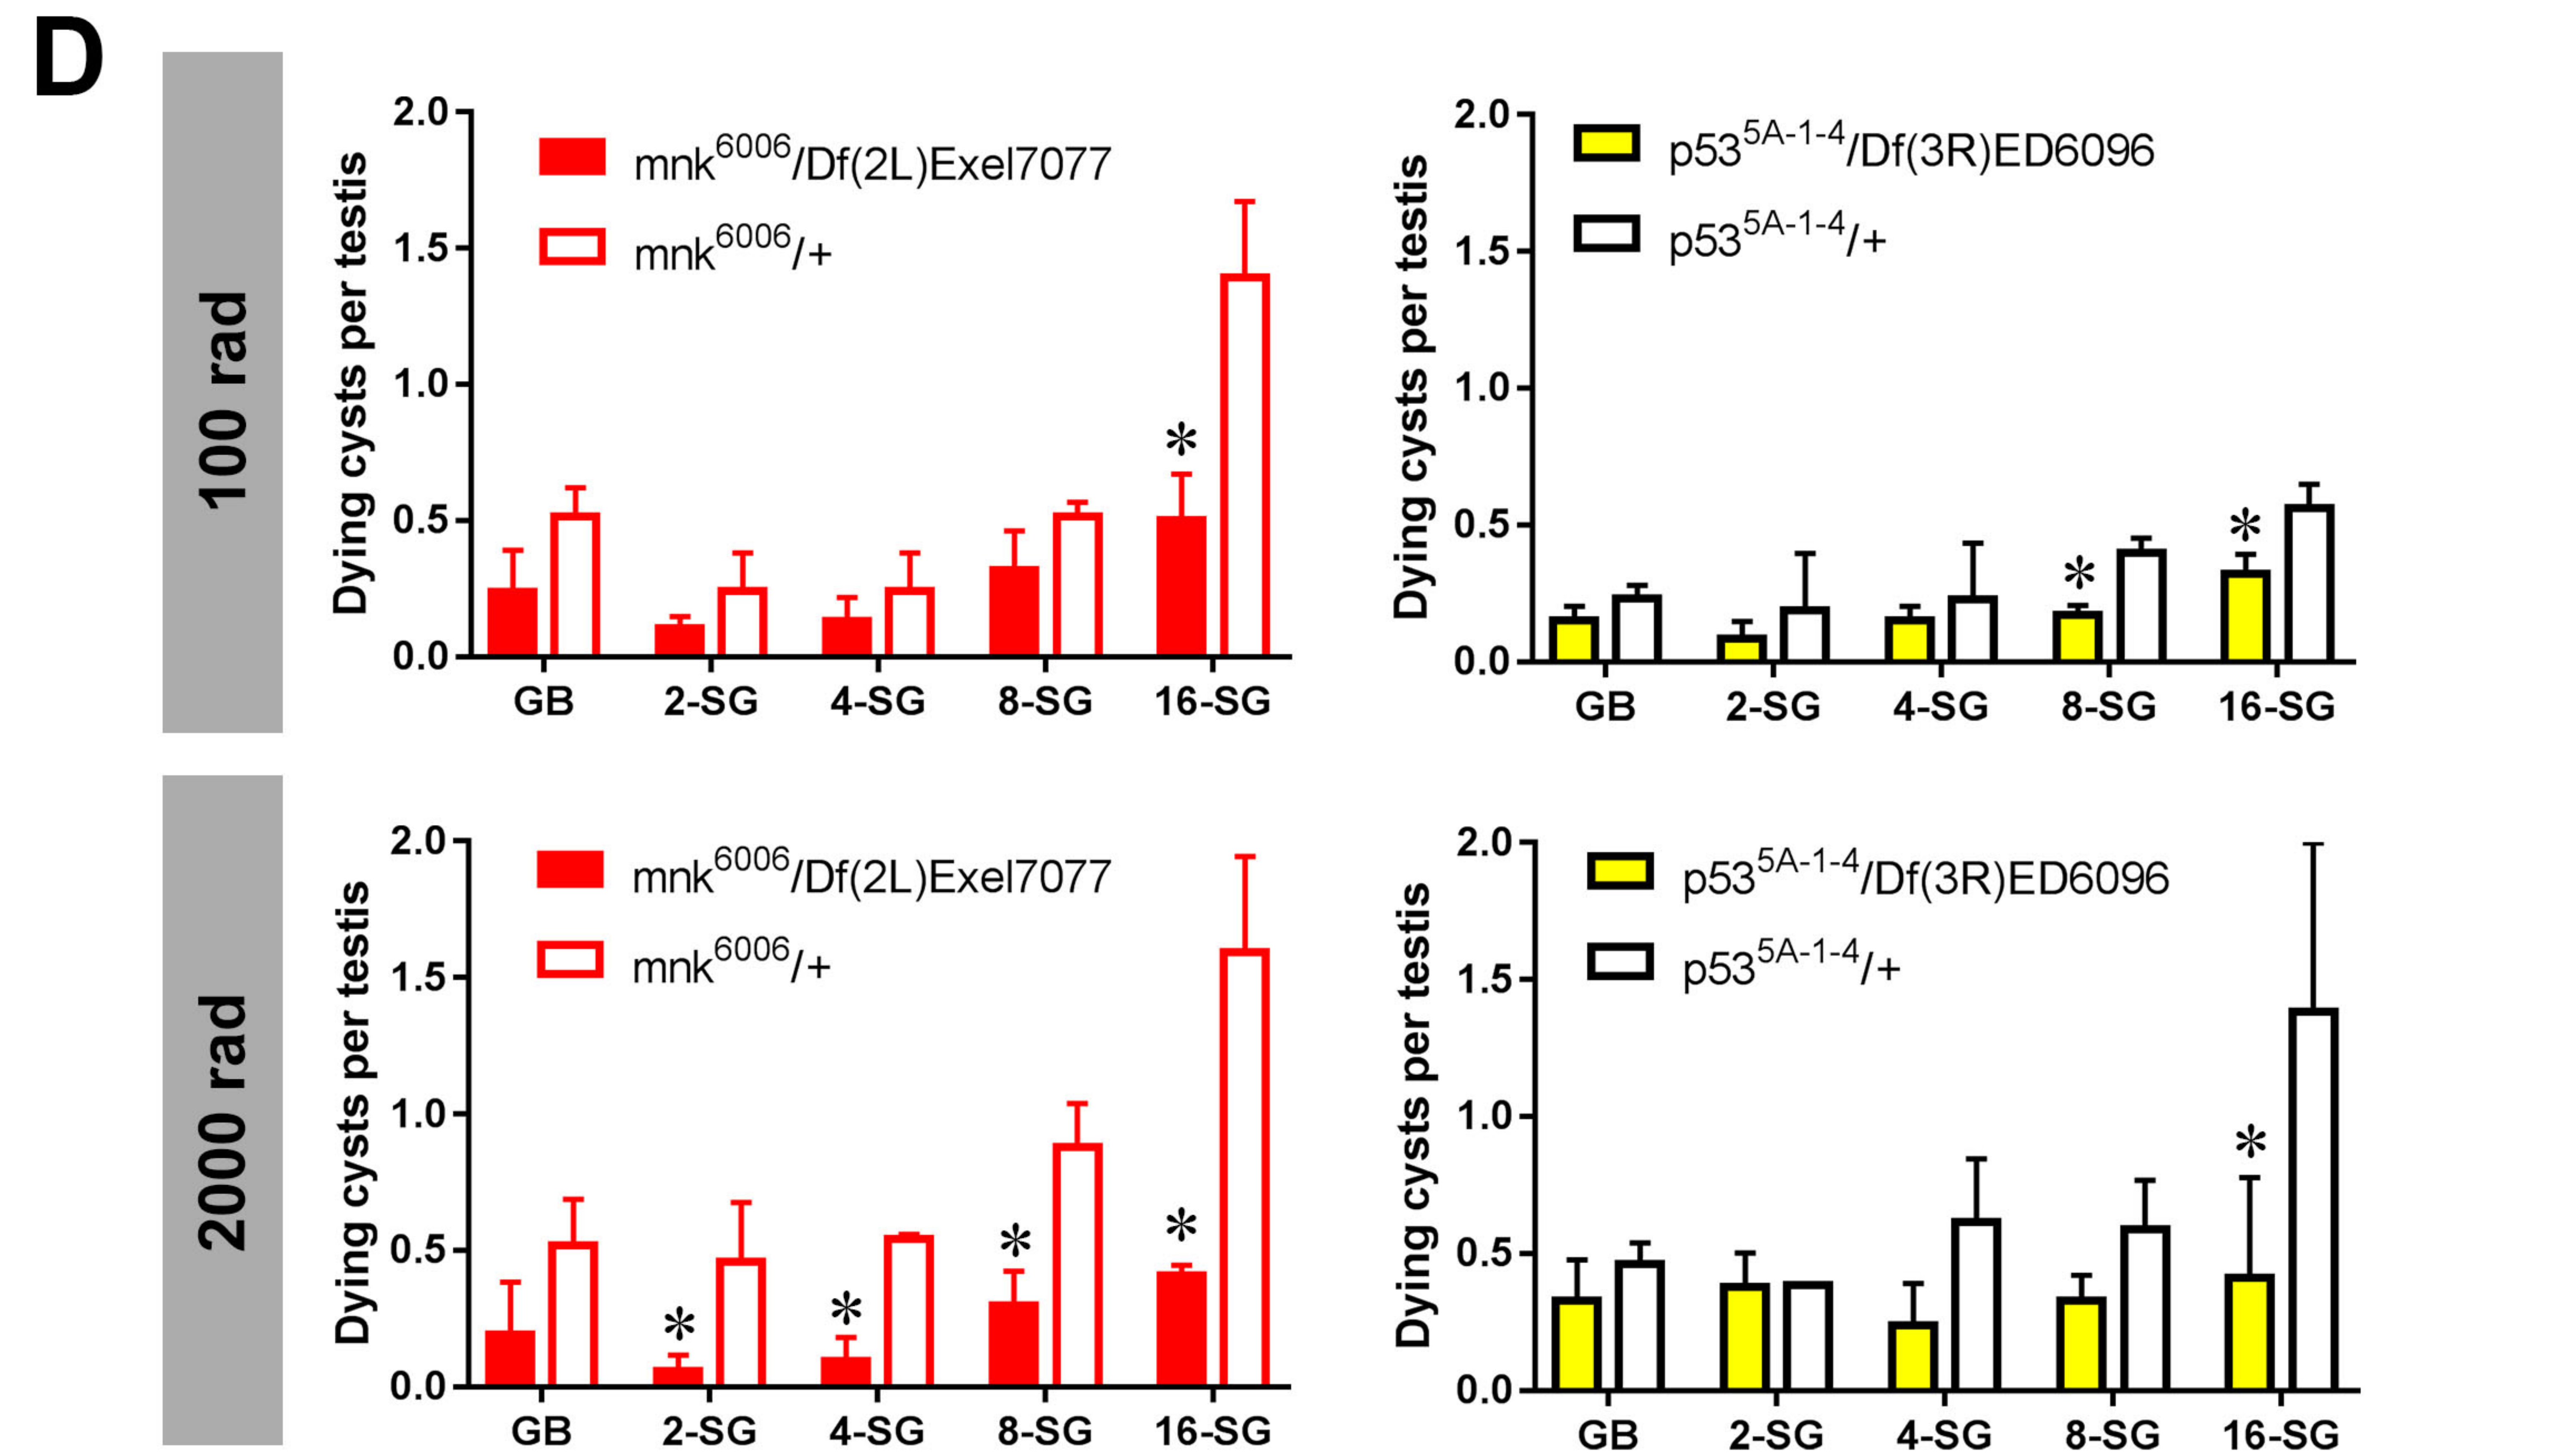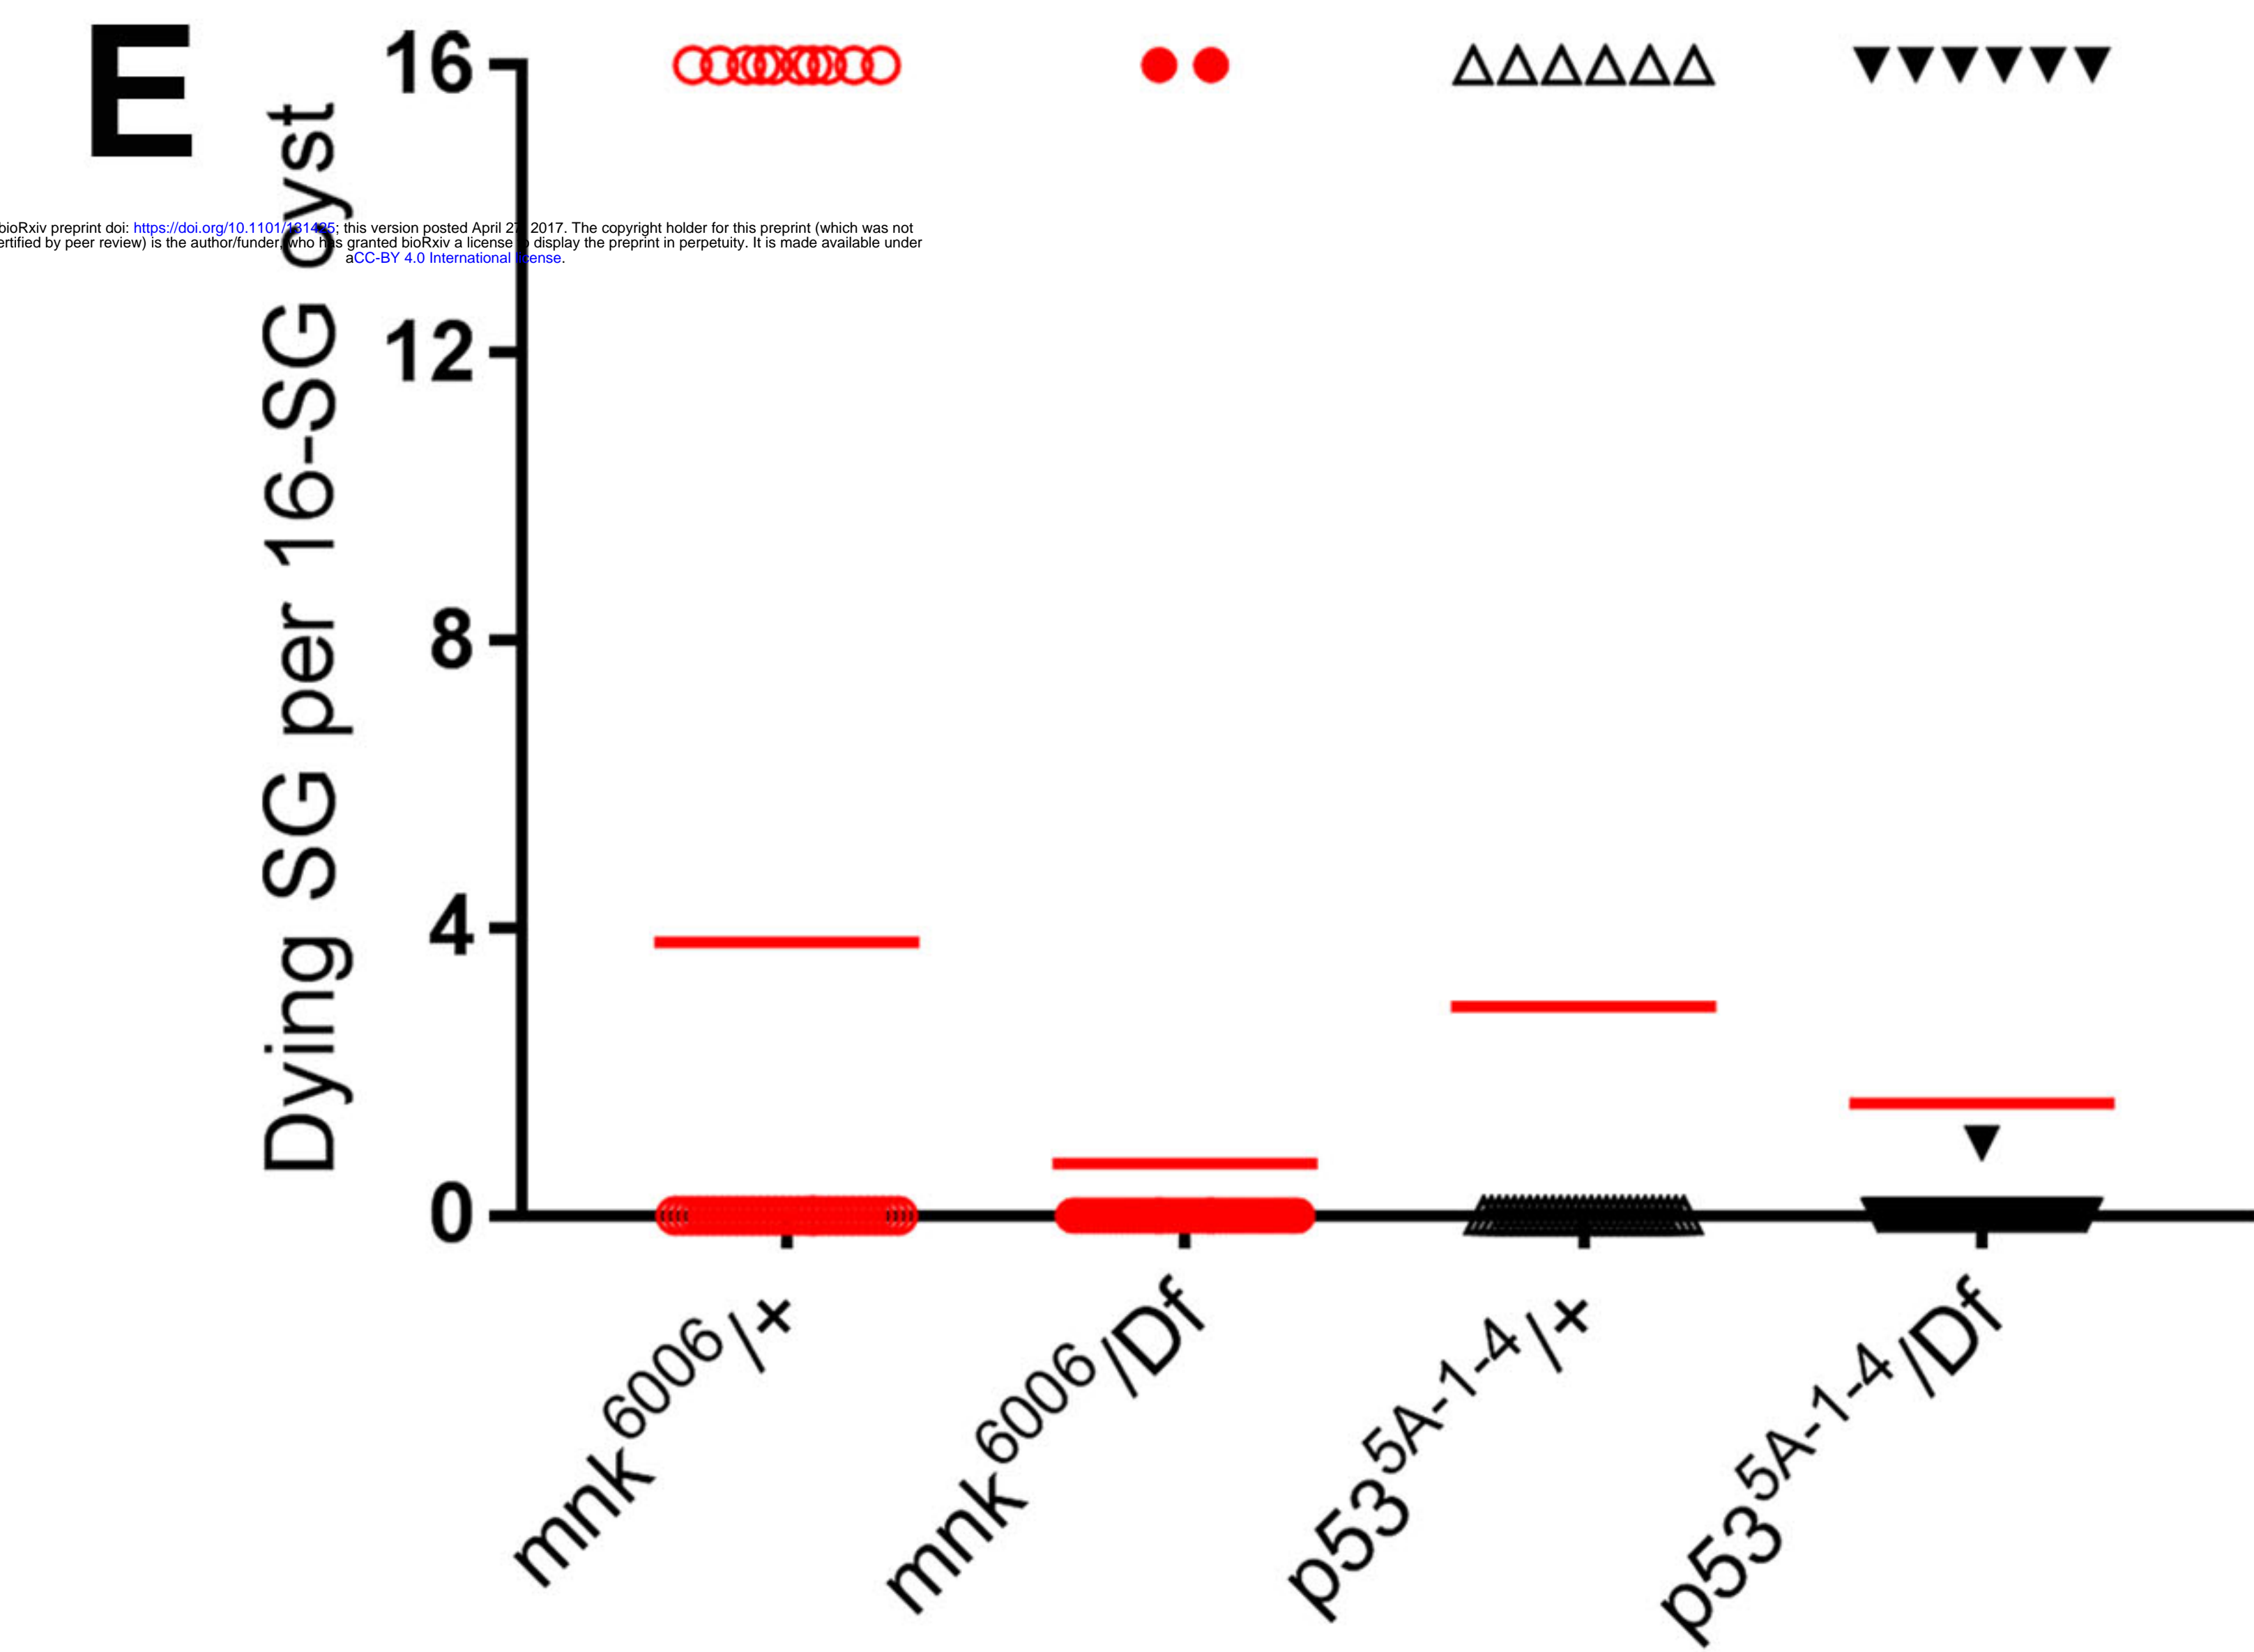



Figure 6

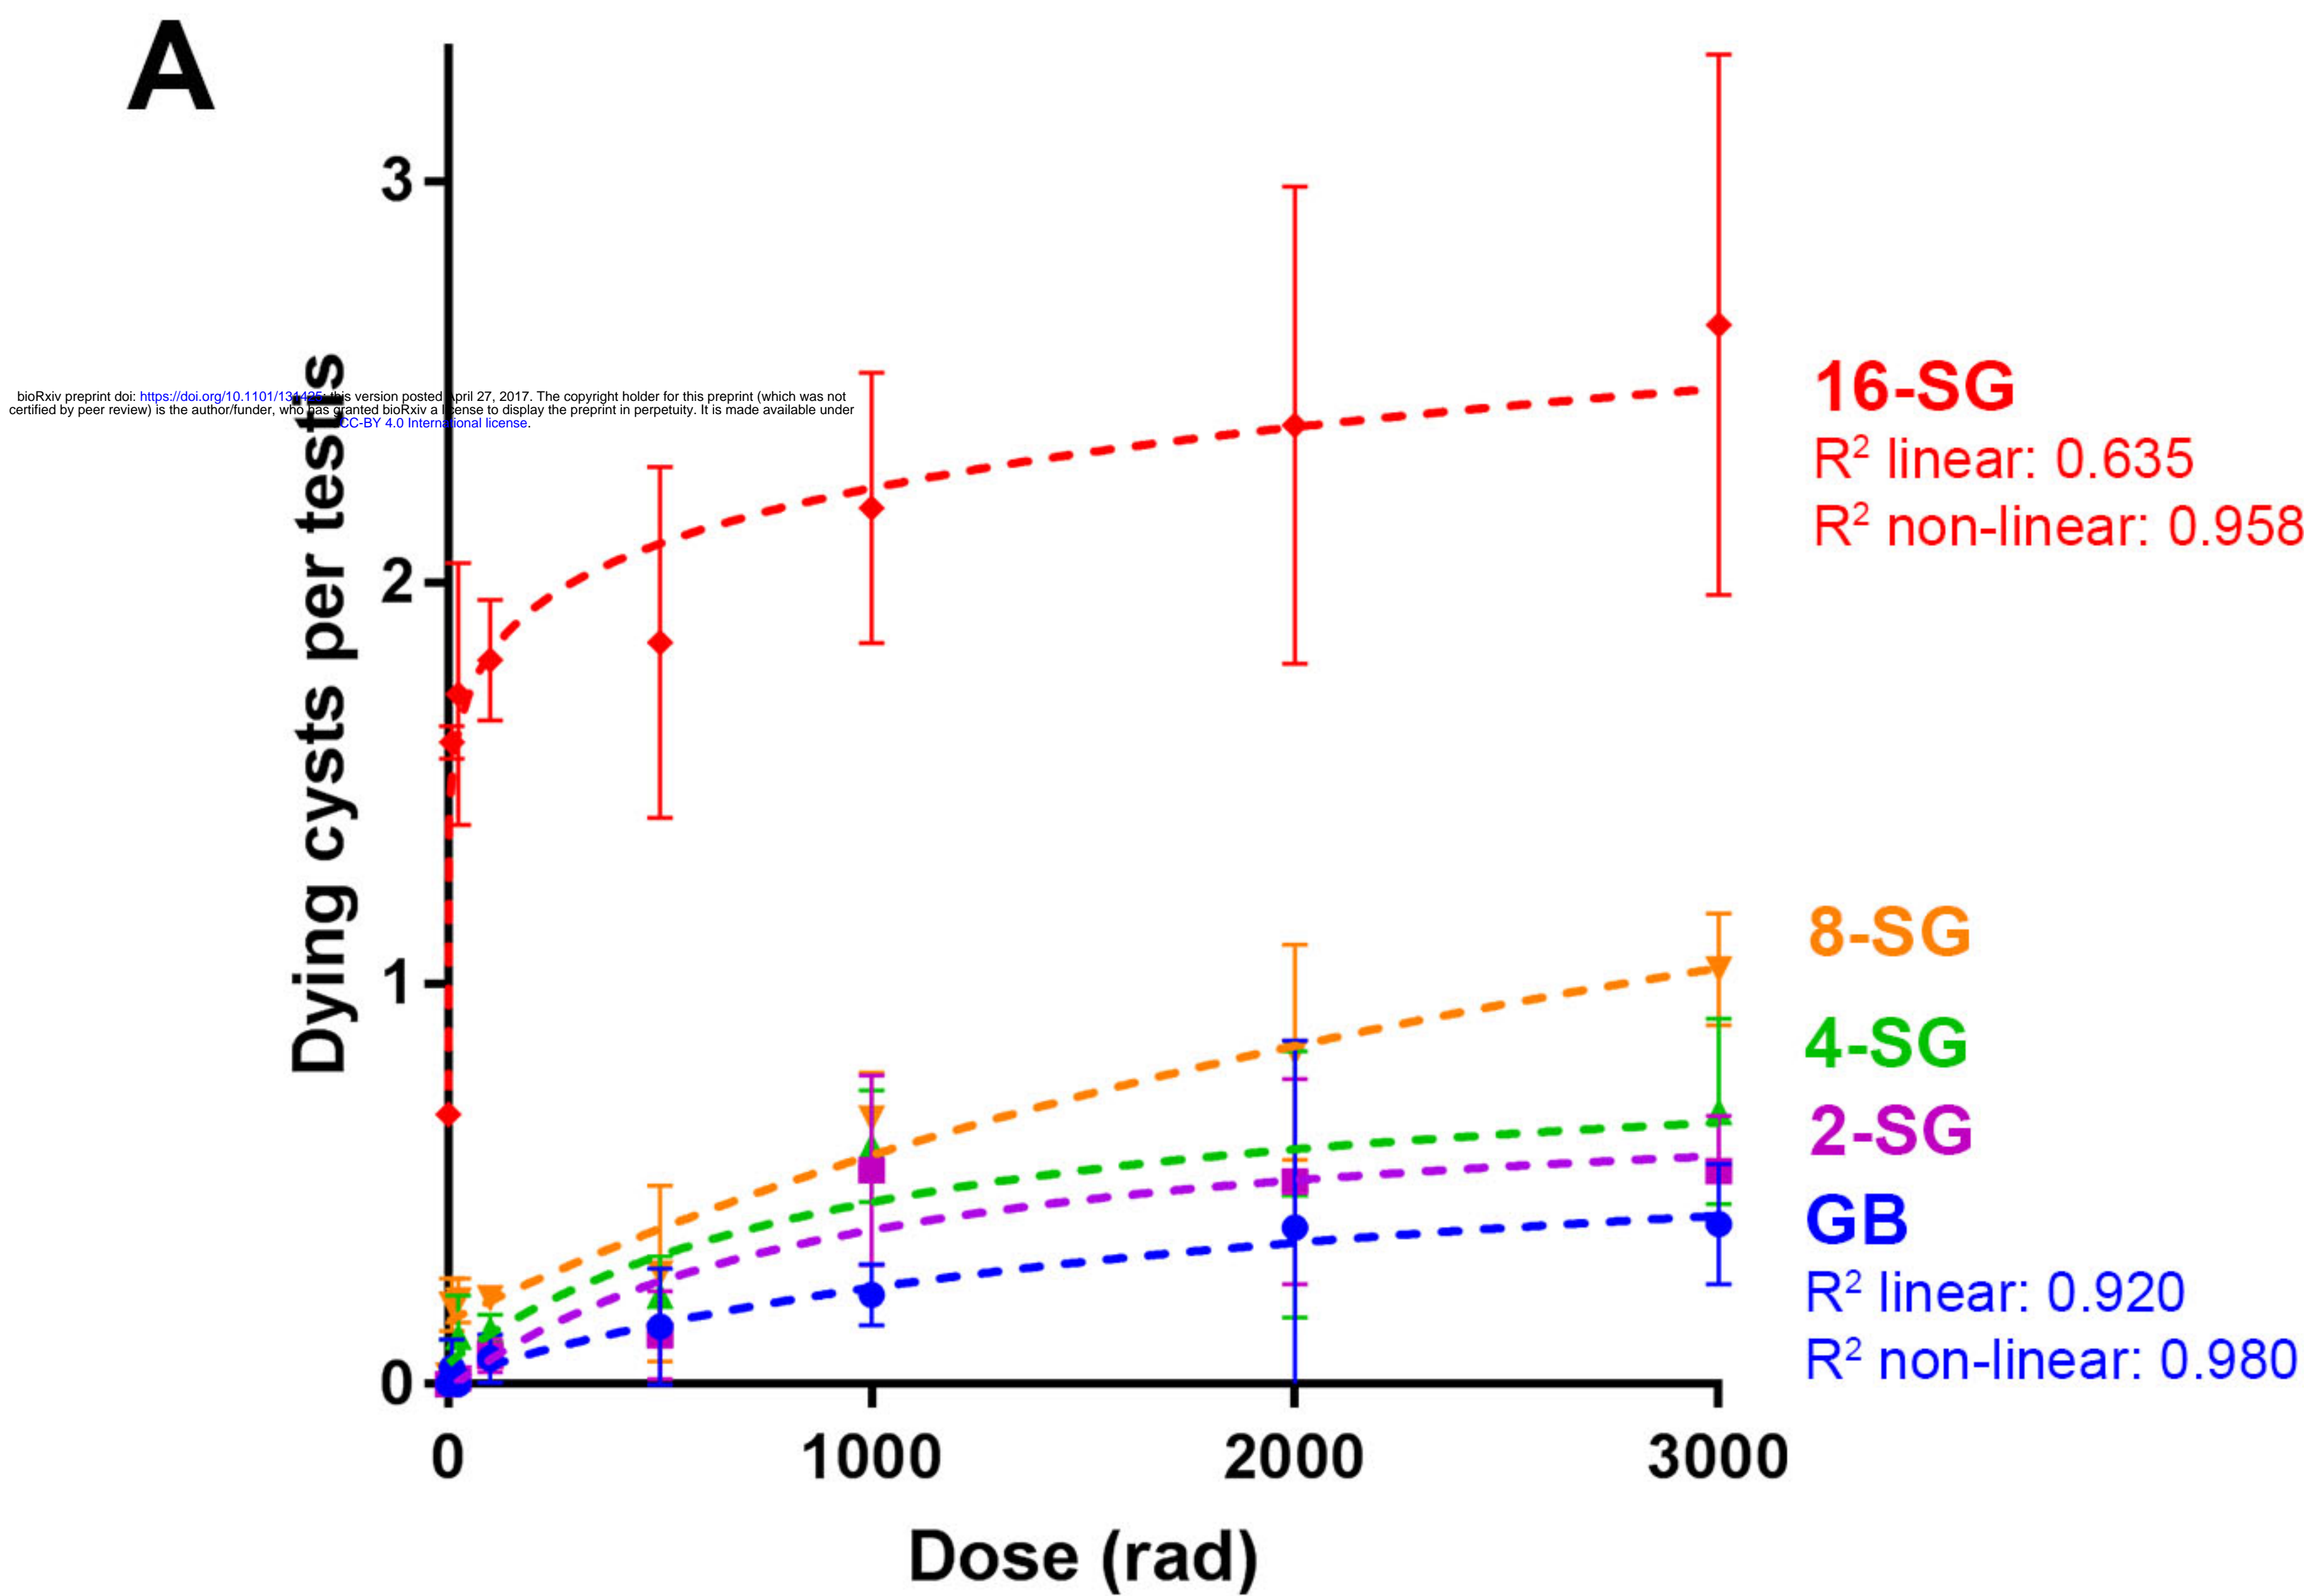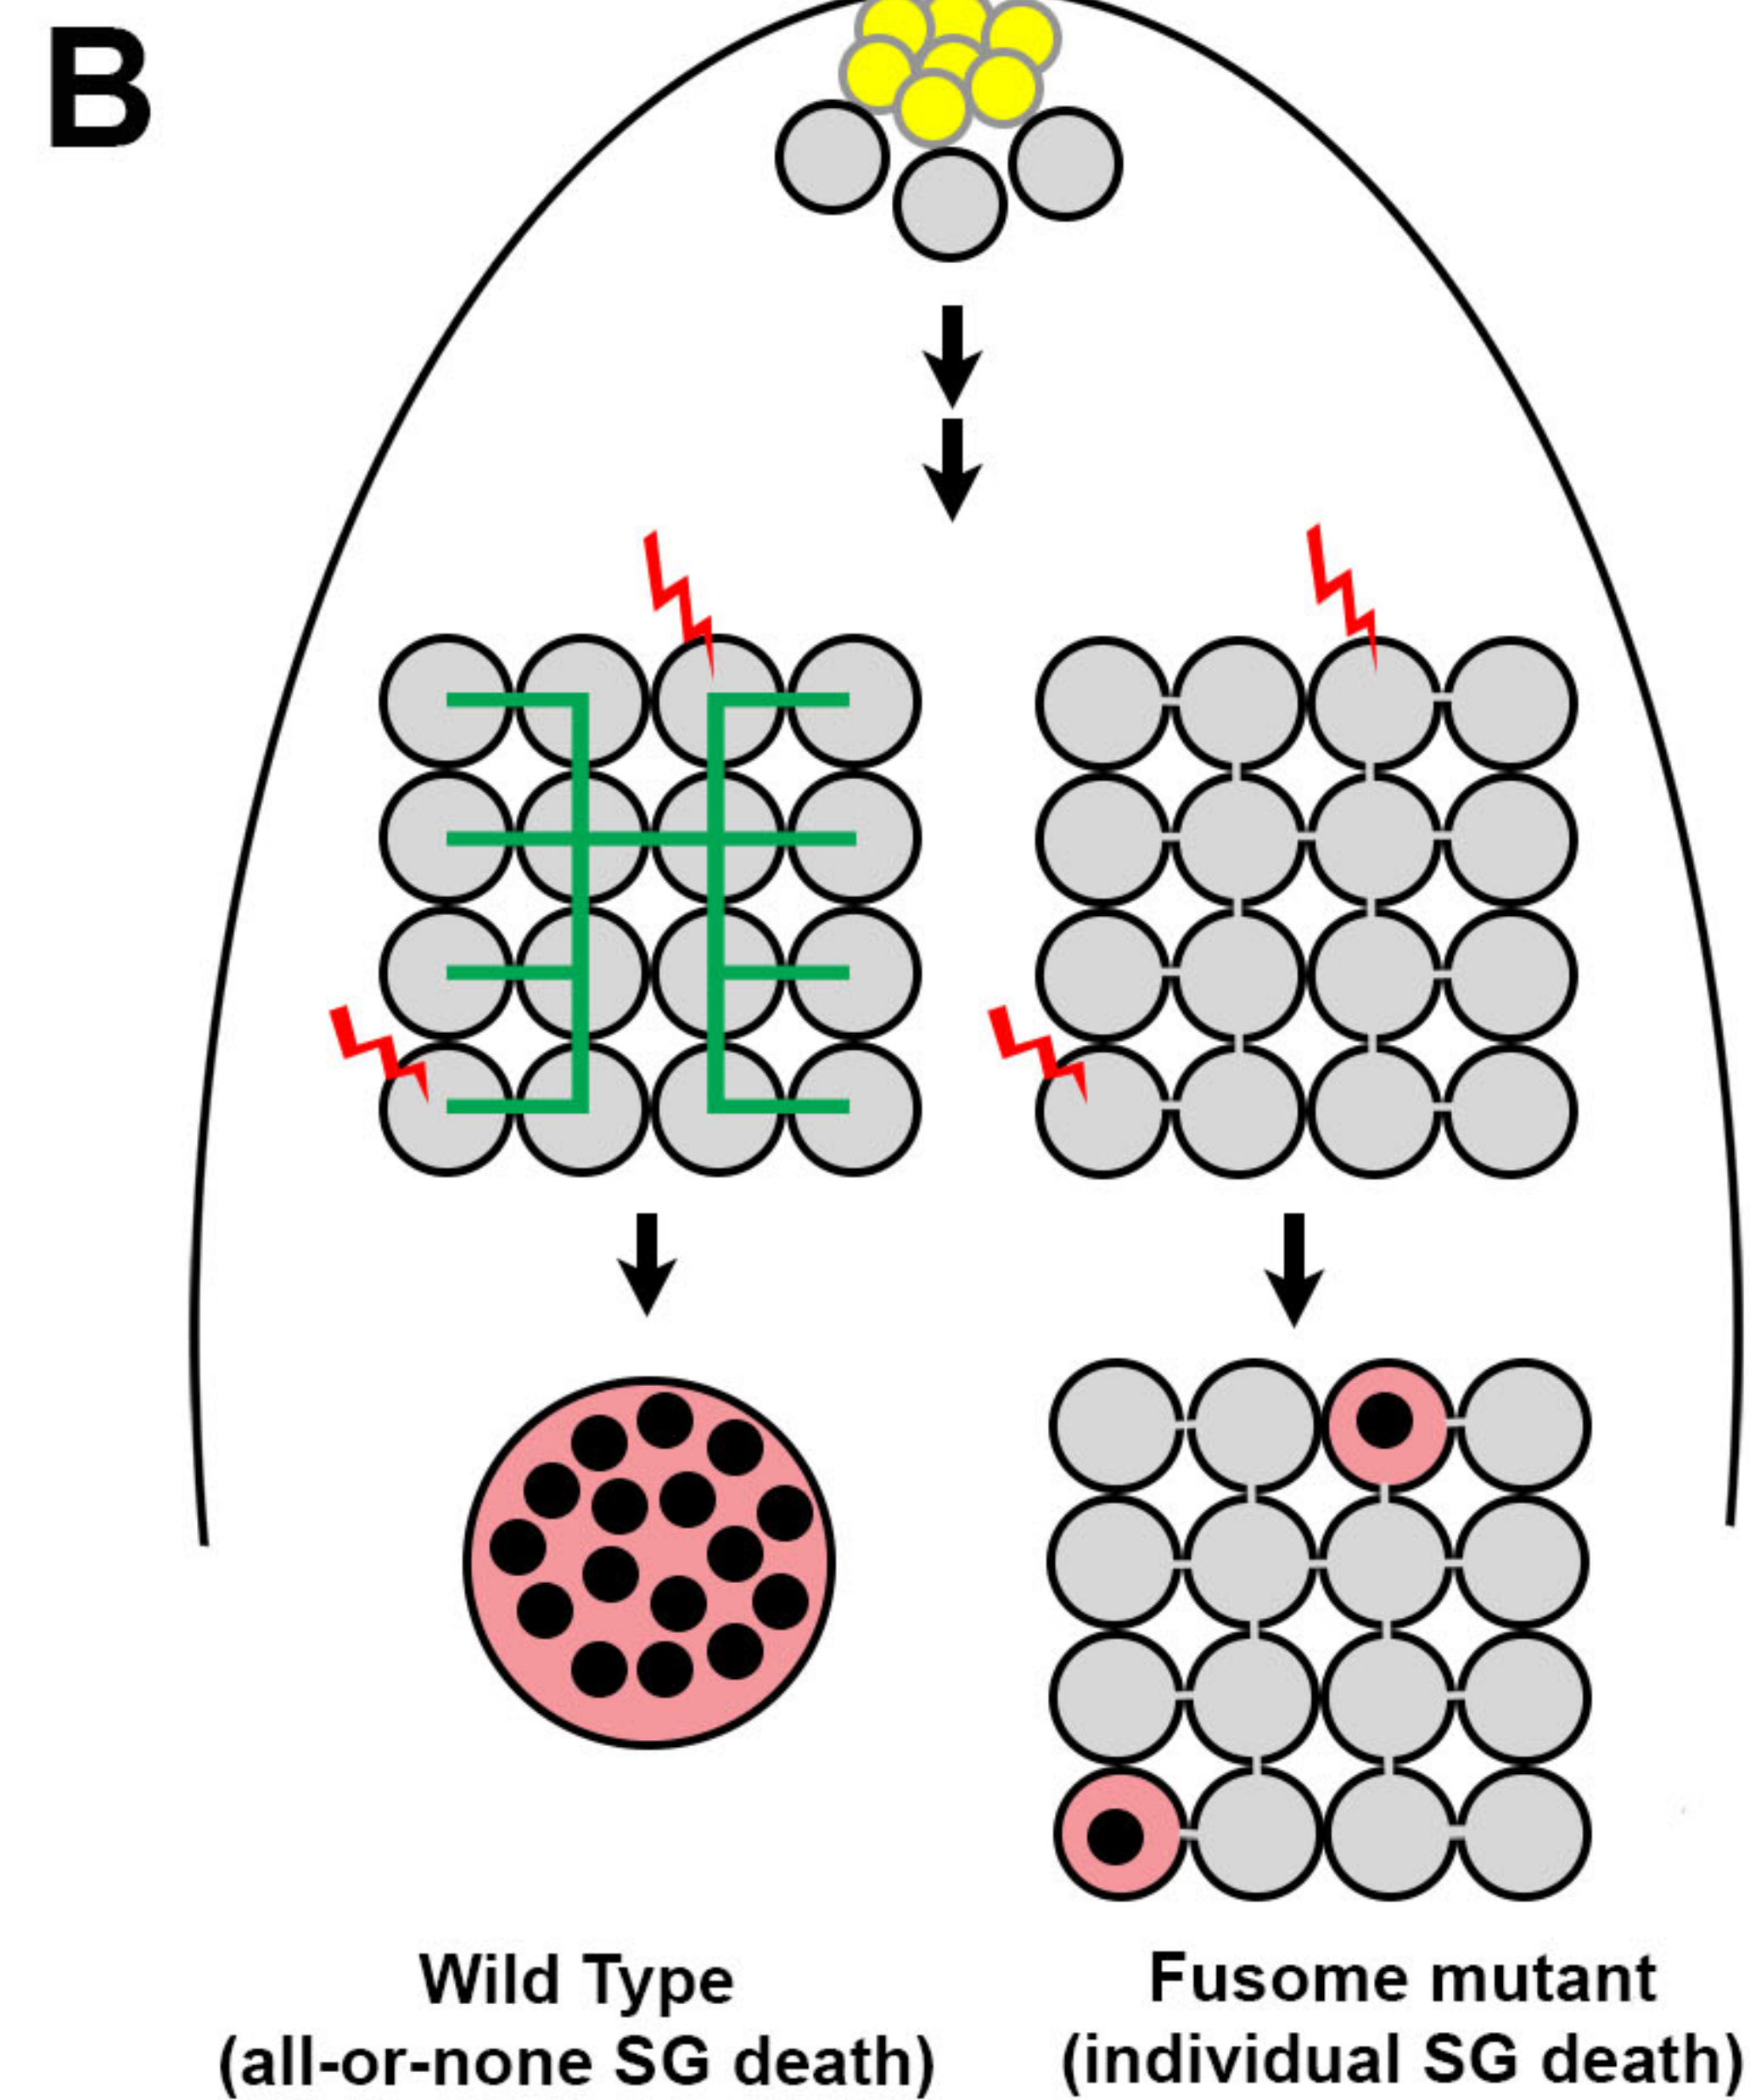



Figure 1 - Figure supplement 1

A

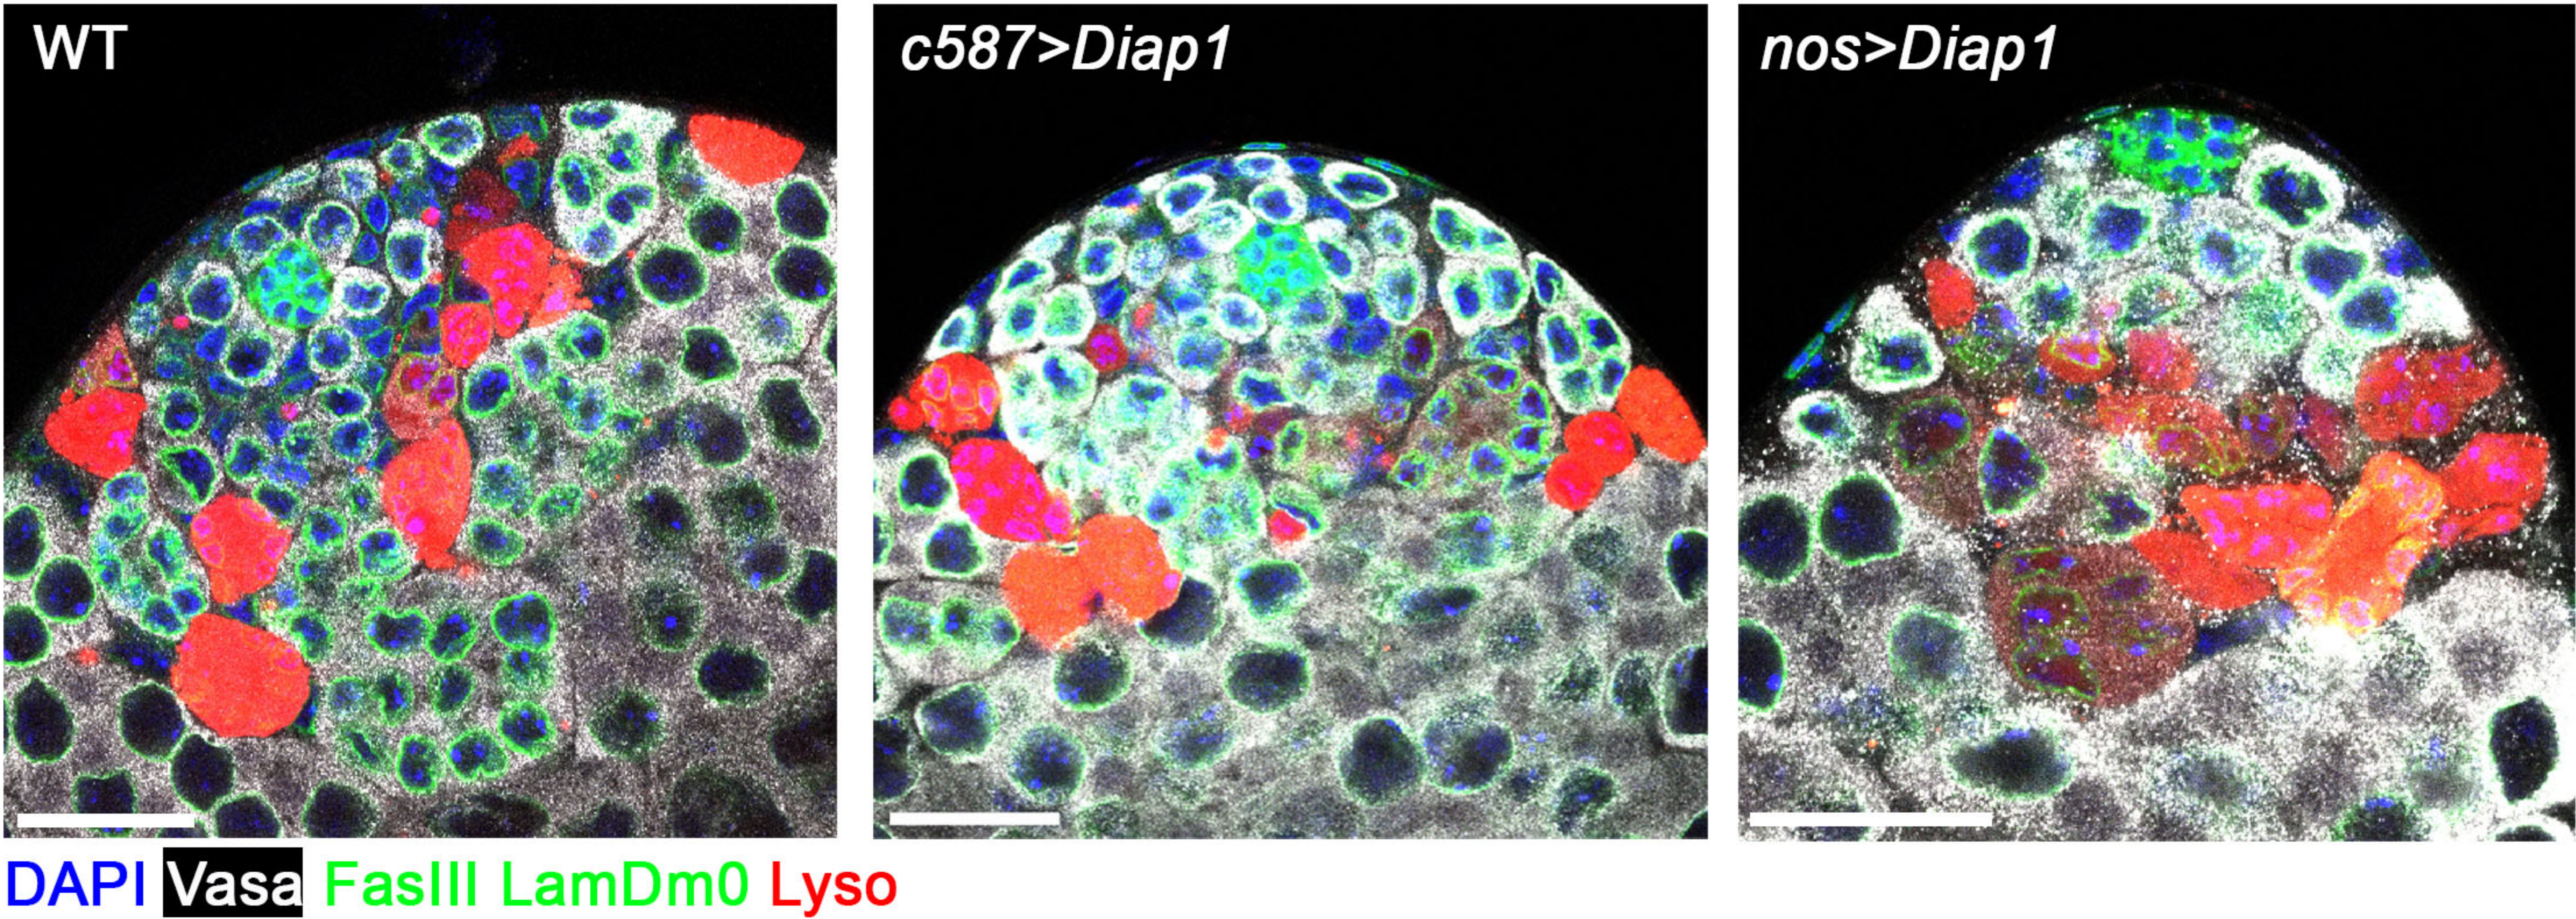

B

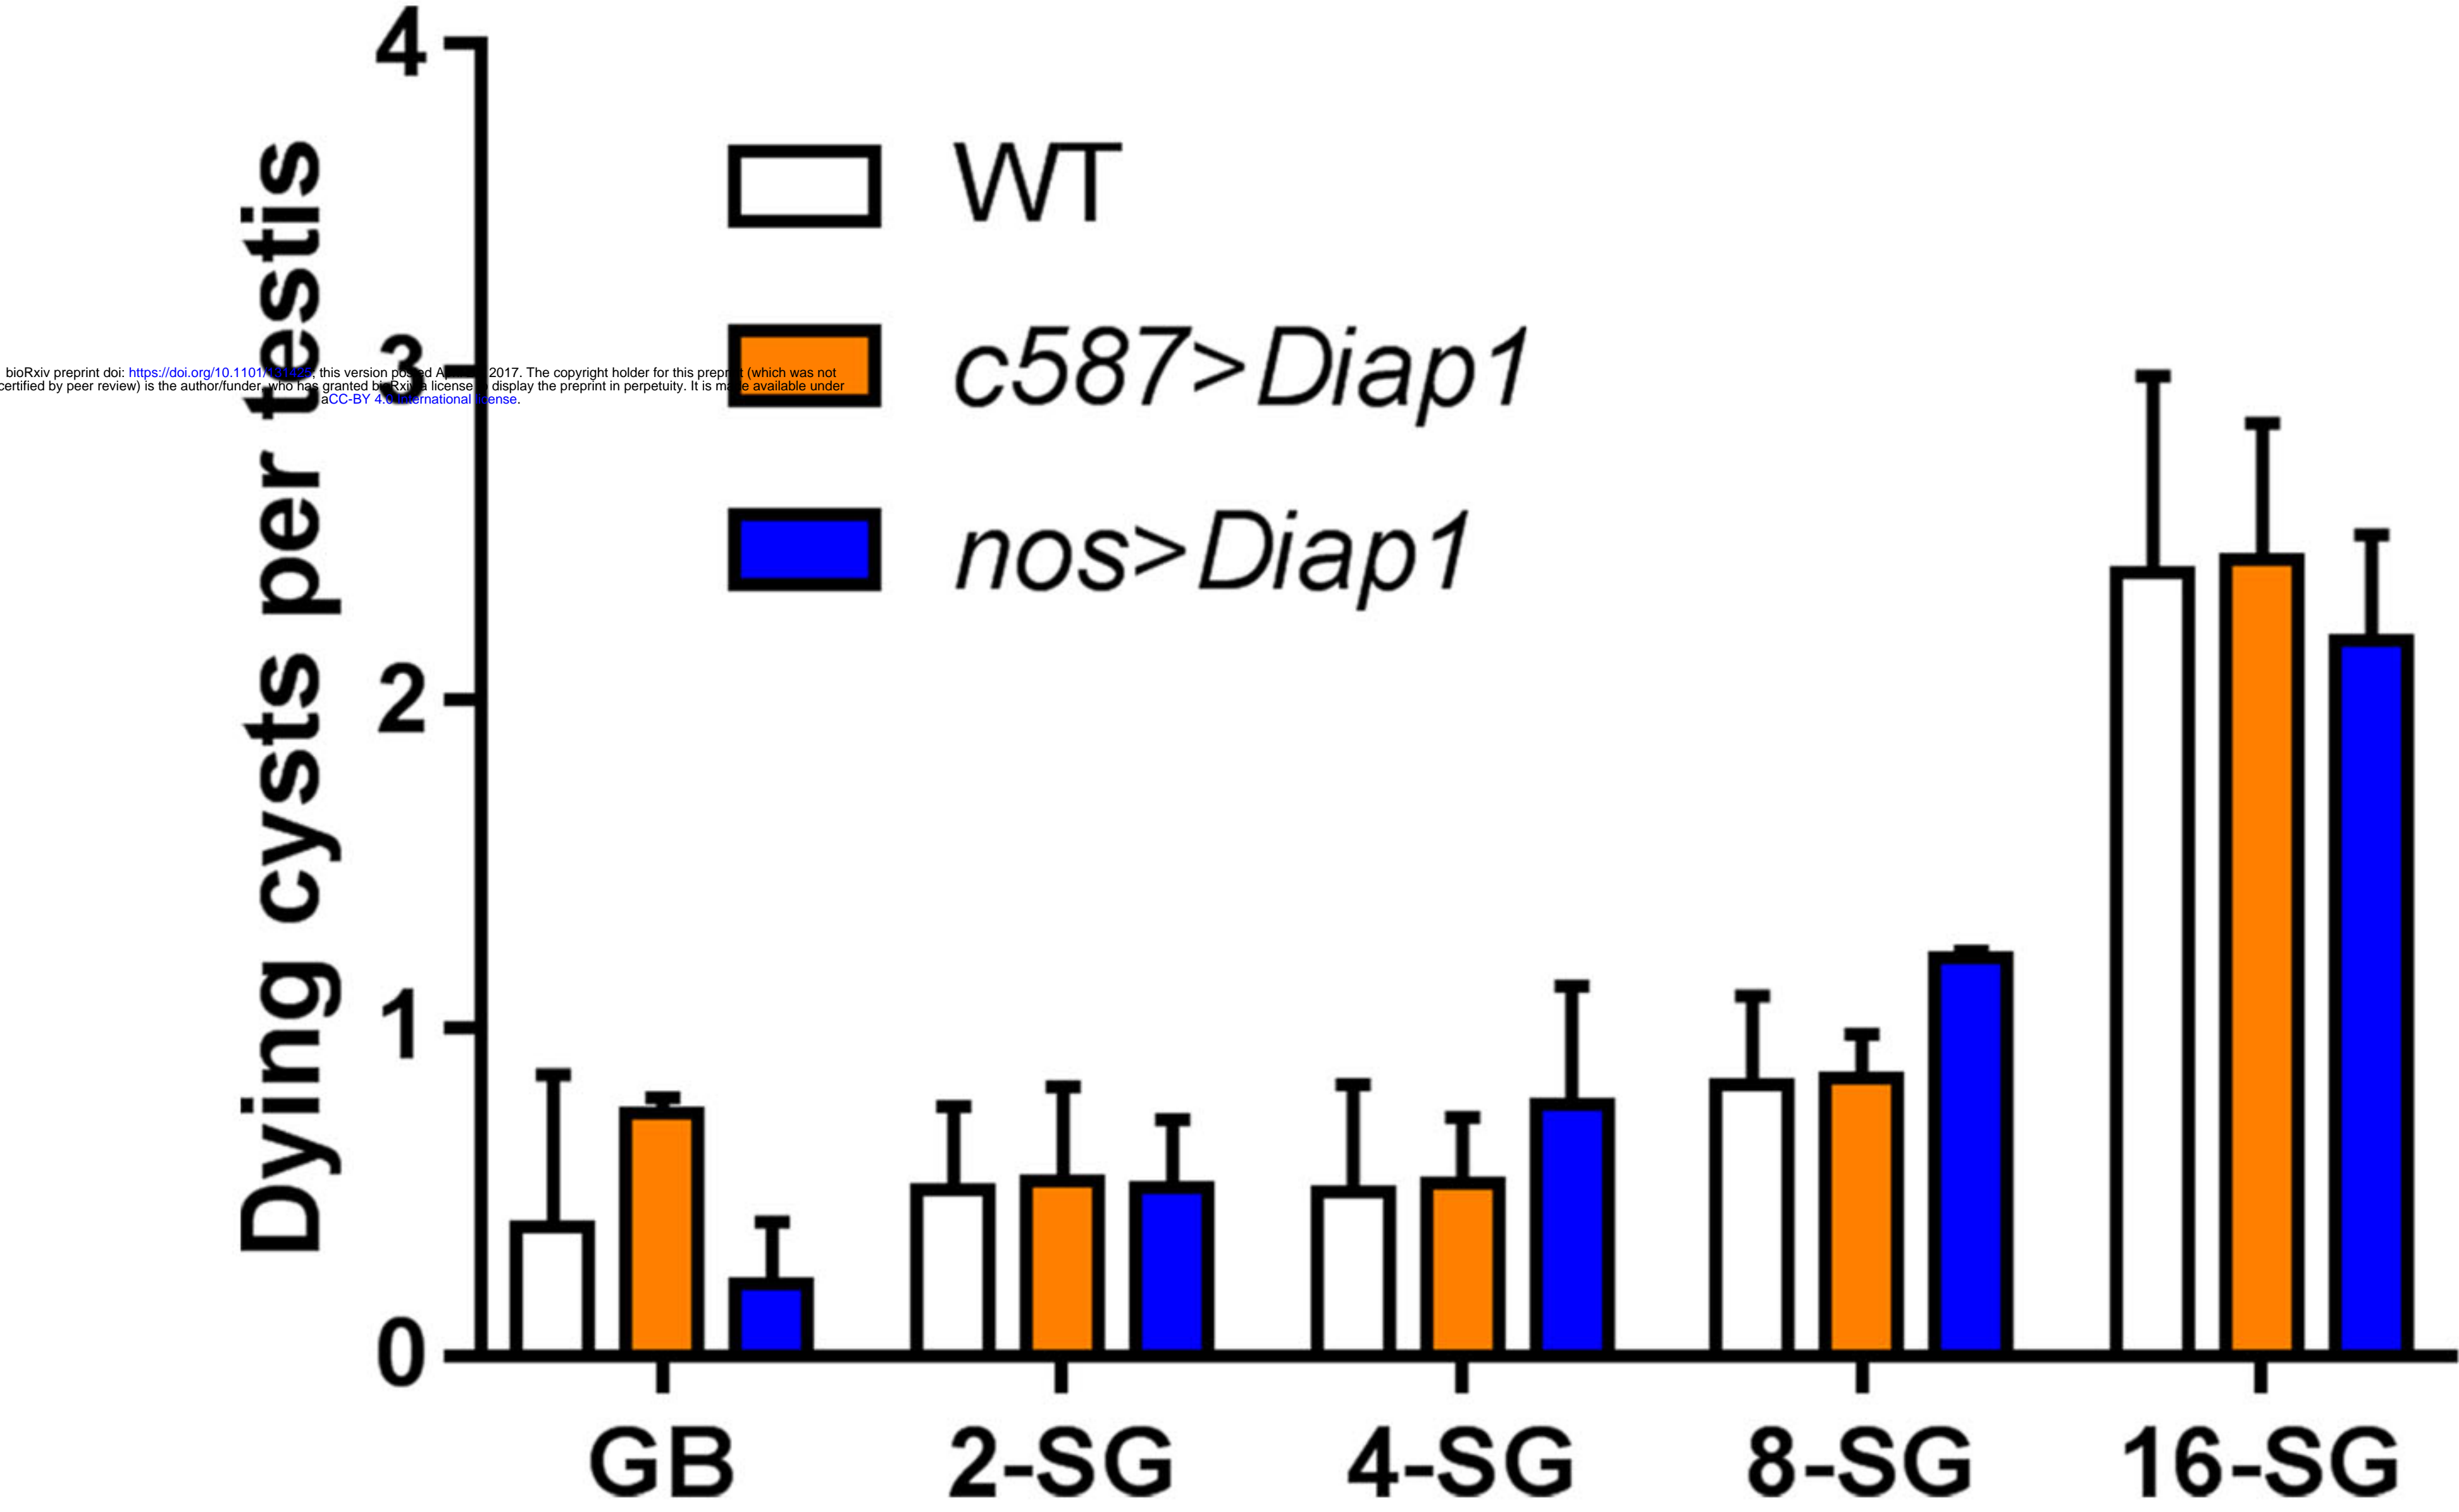



Figure 1 - Figure supplement 2

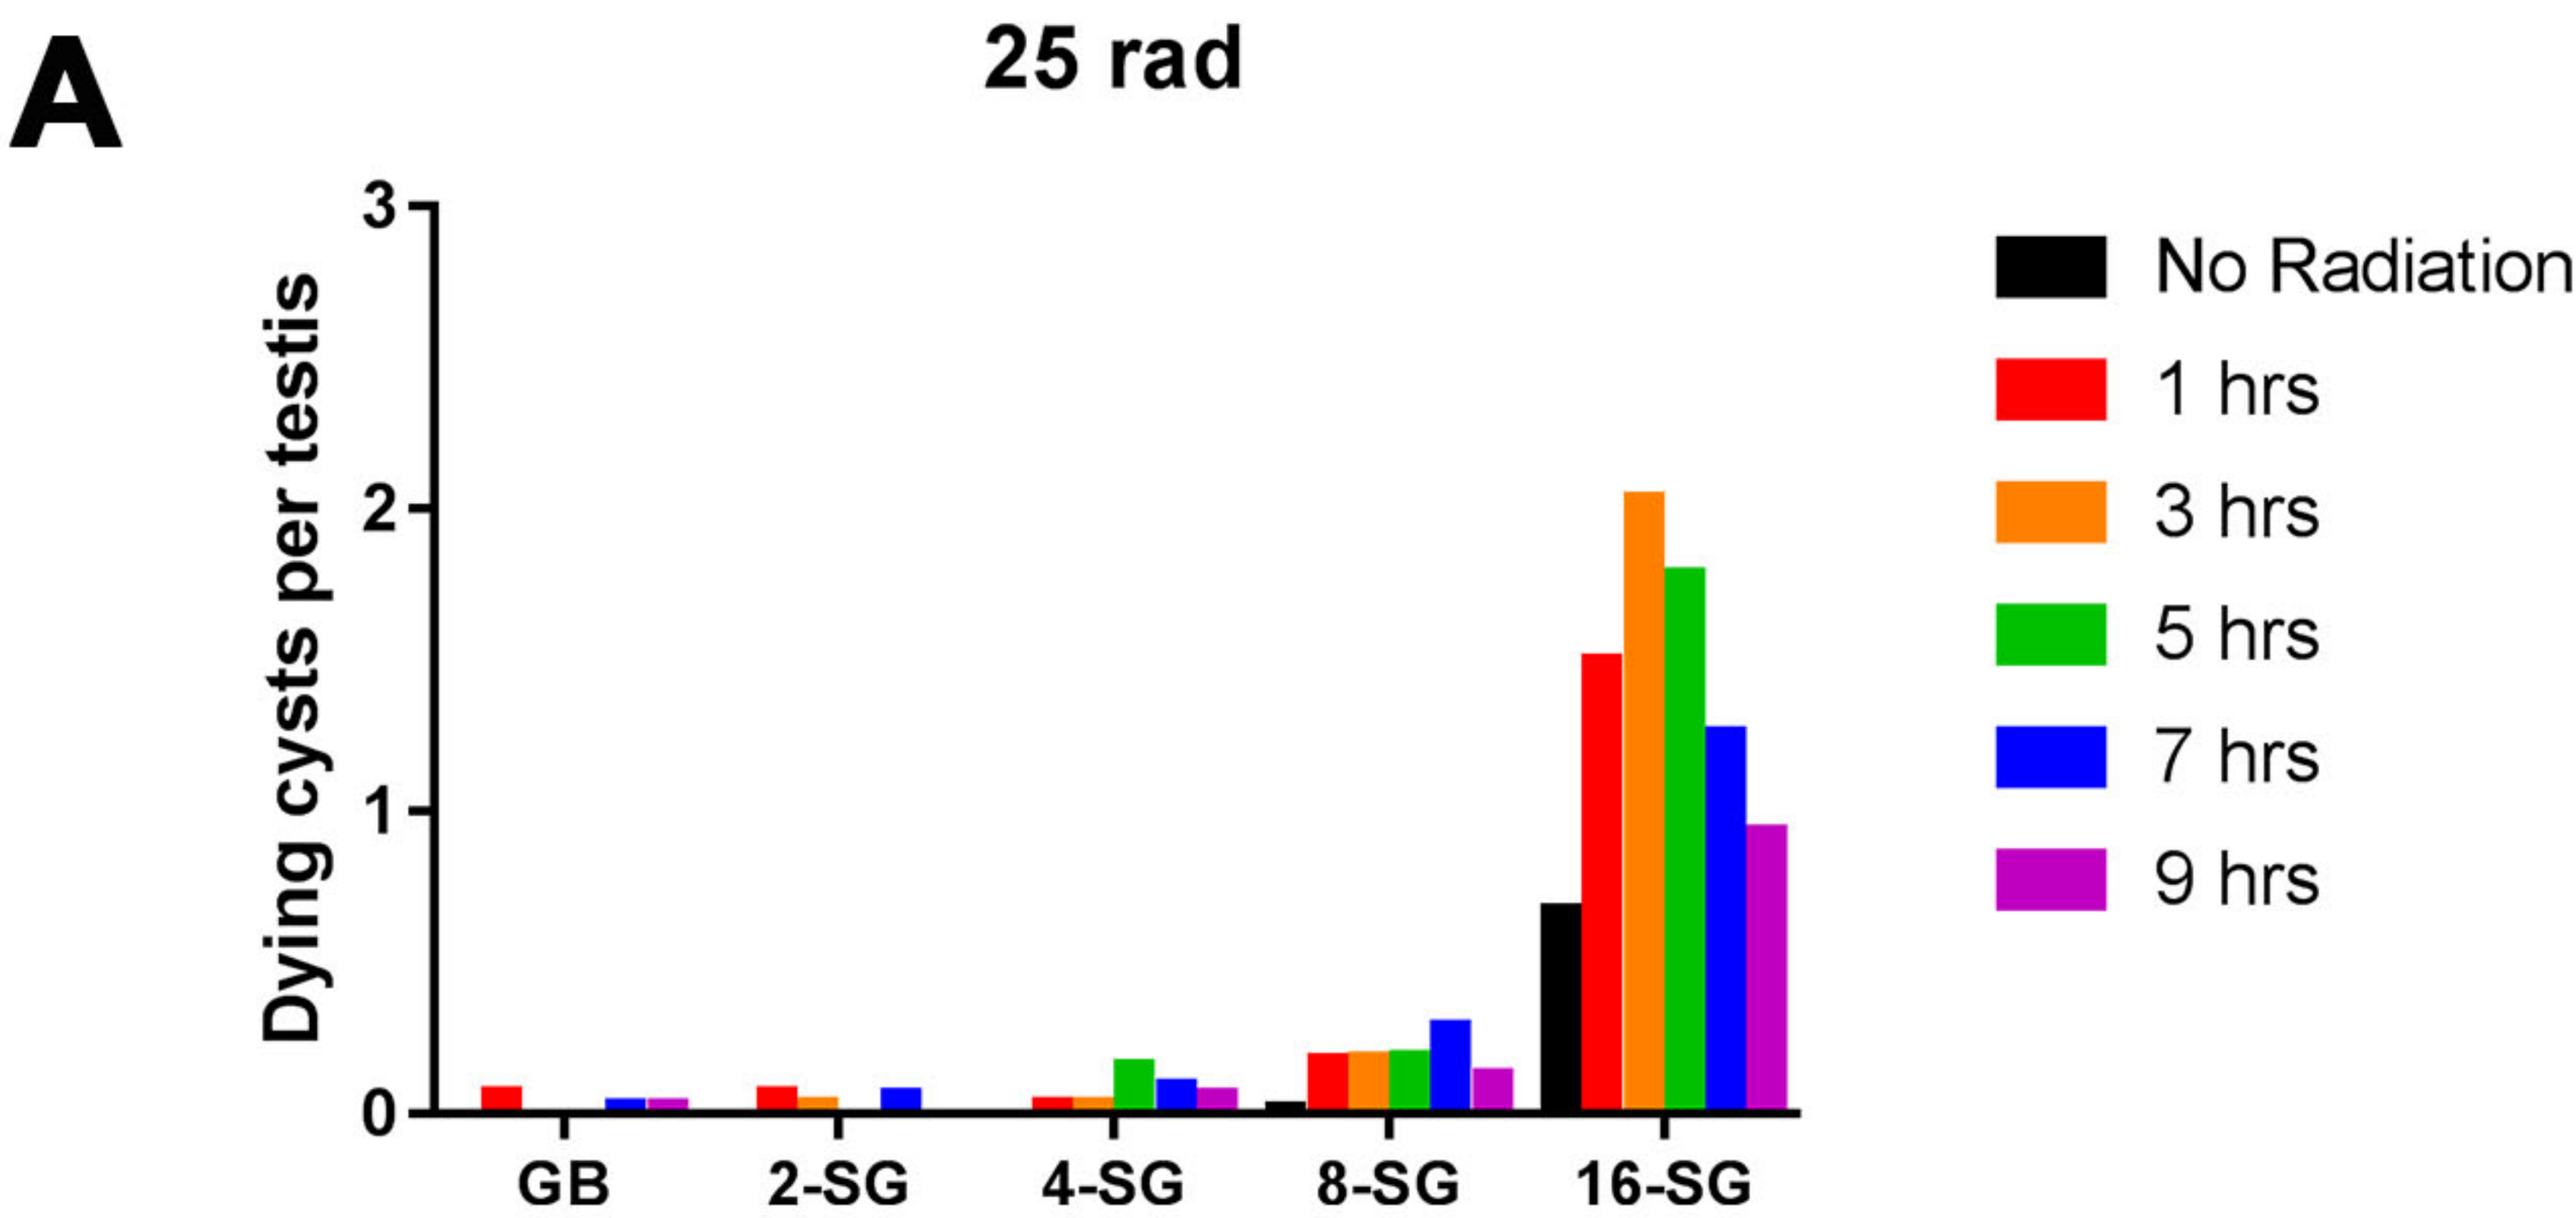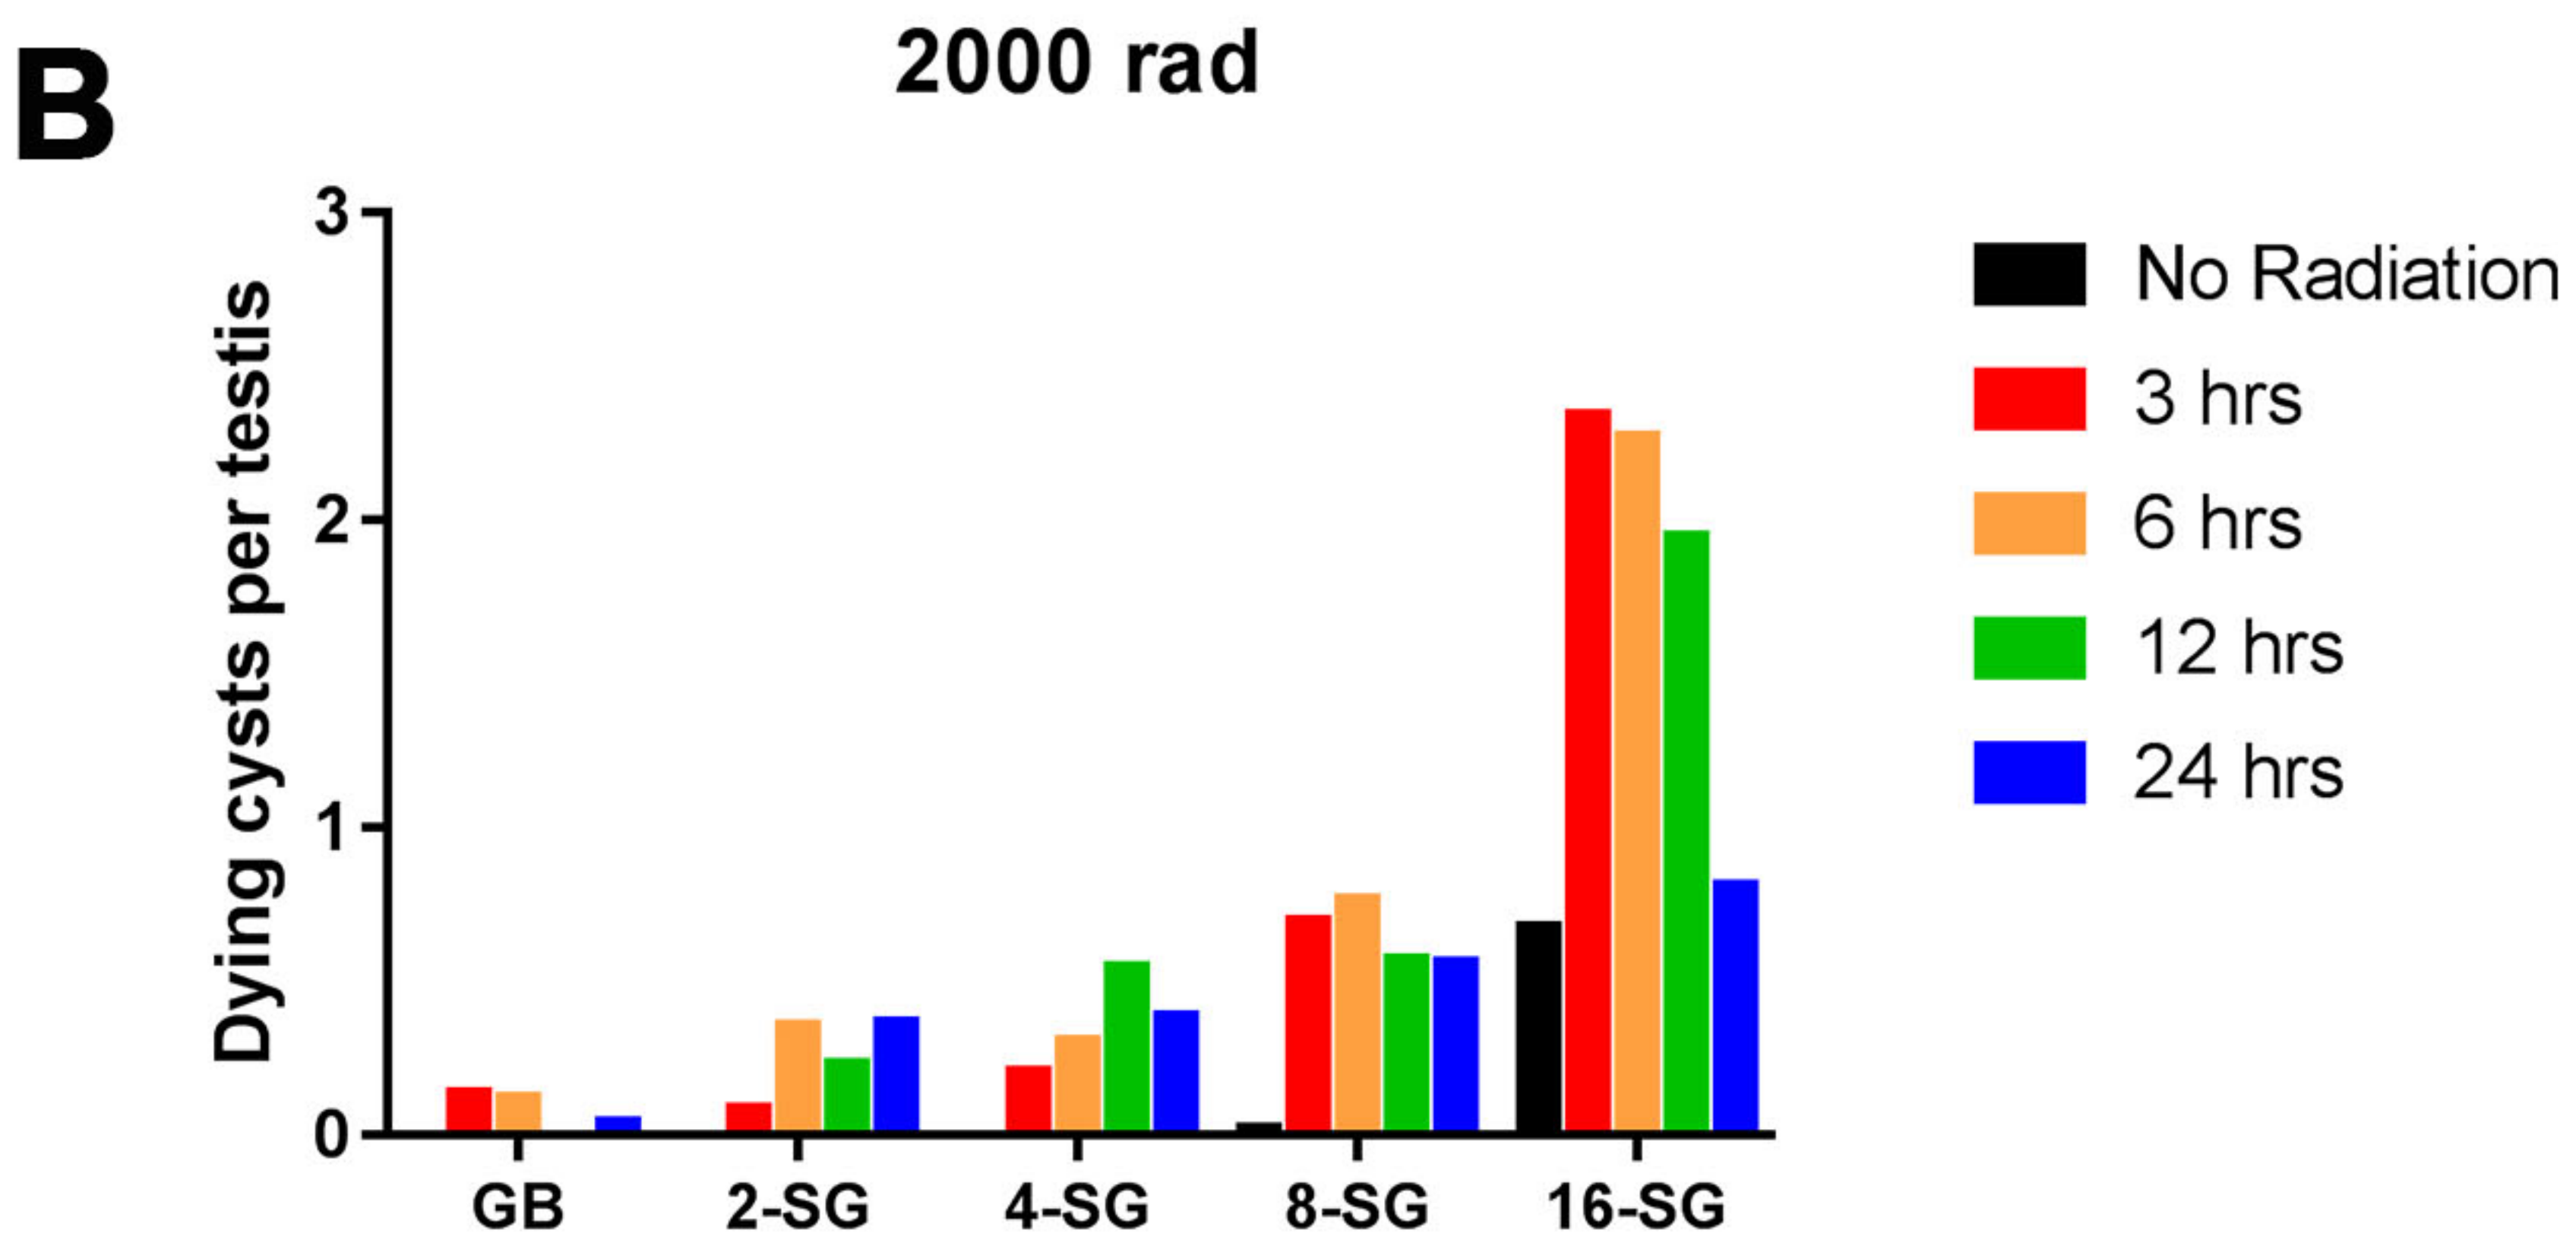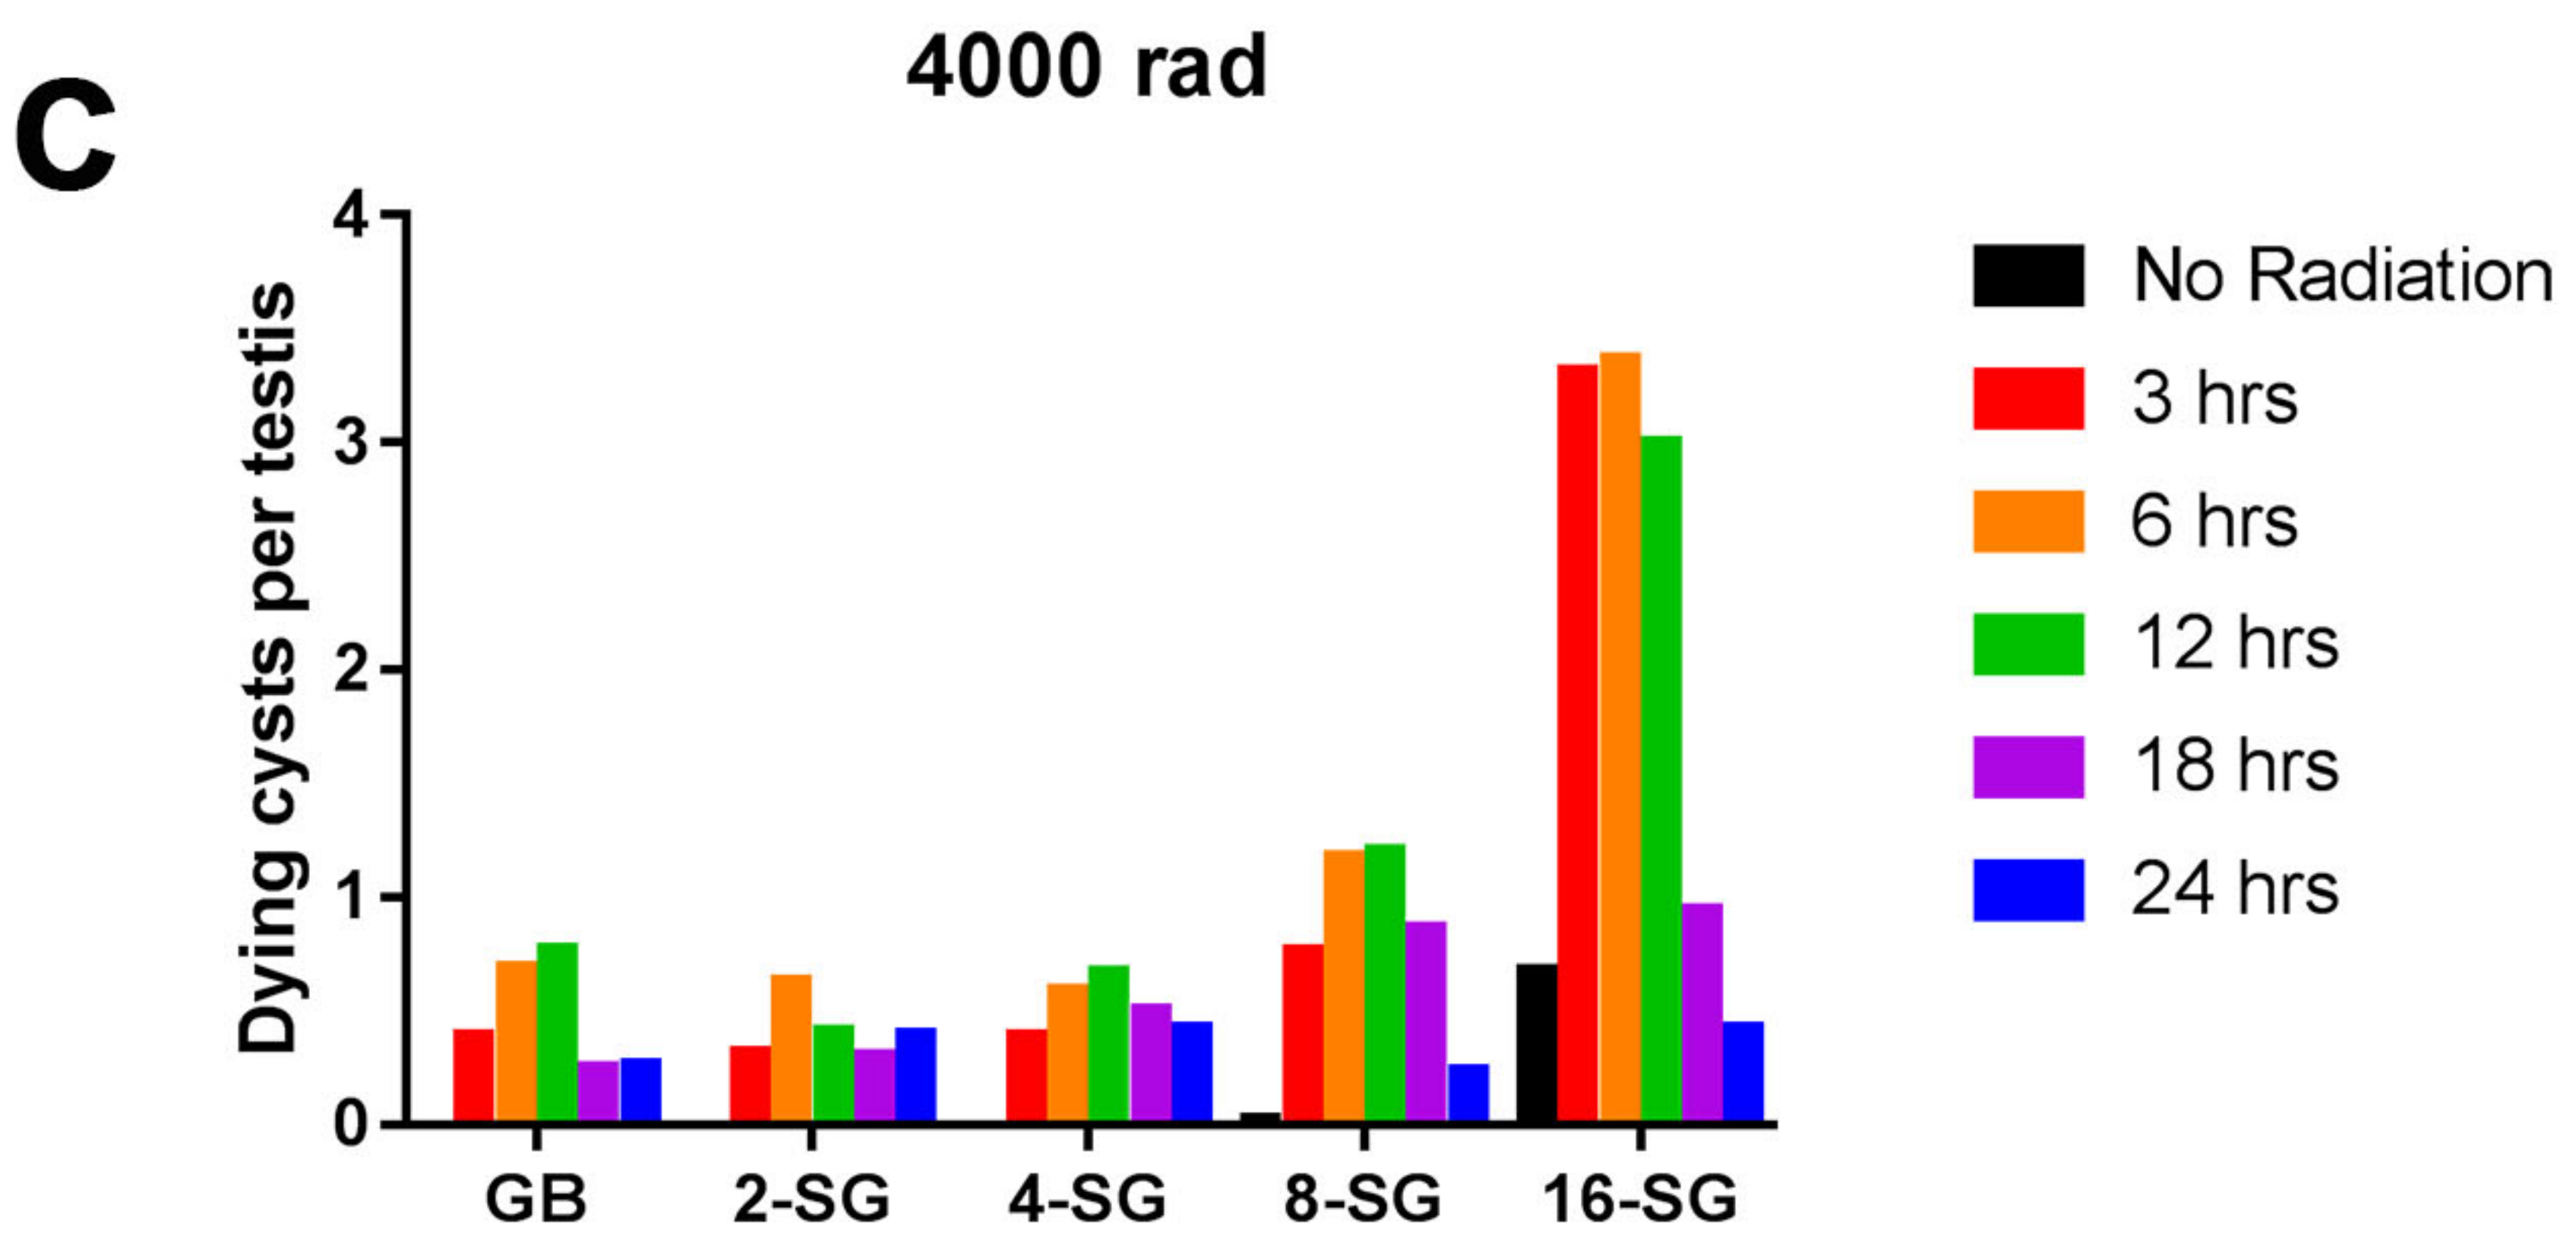



Figure 1 - Figure supplement 3

No Radiation

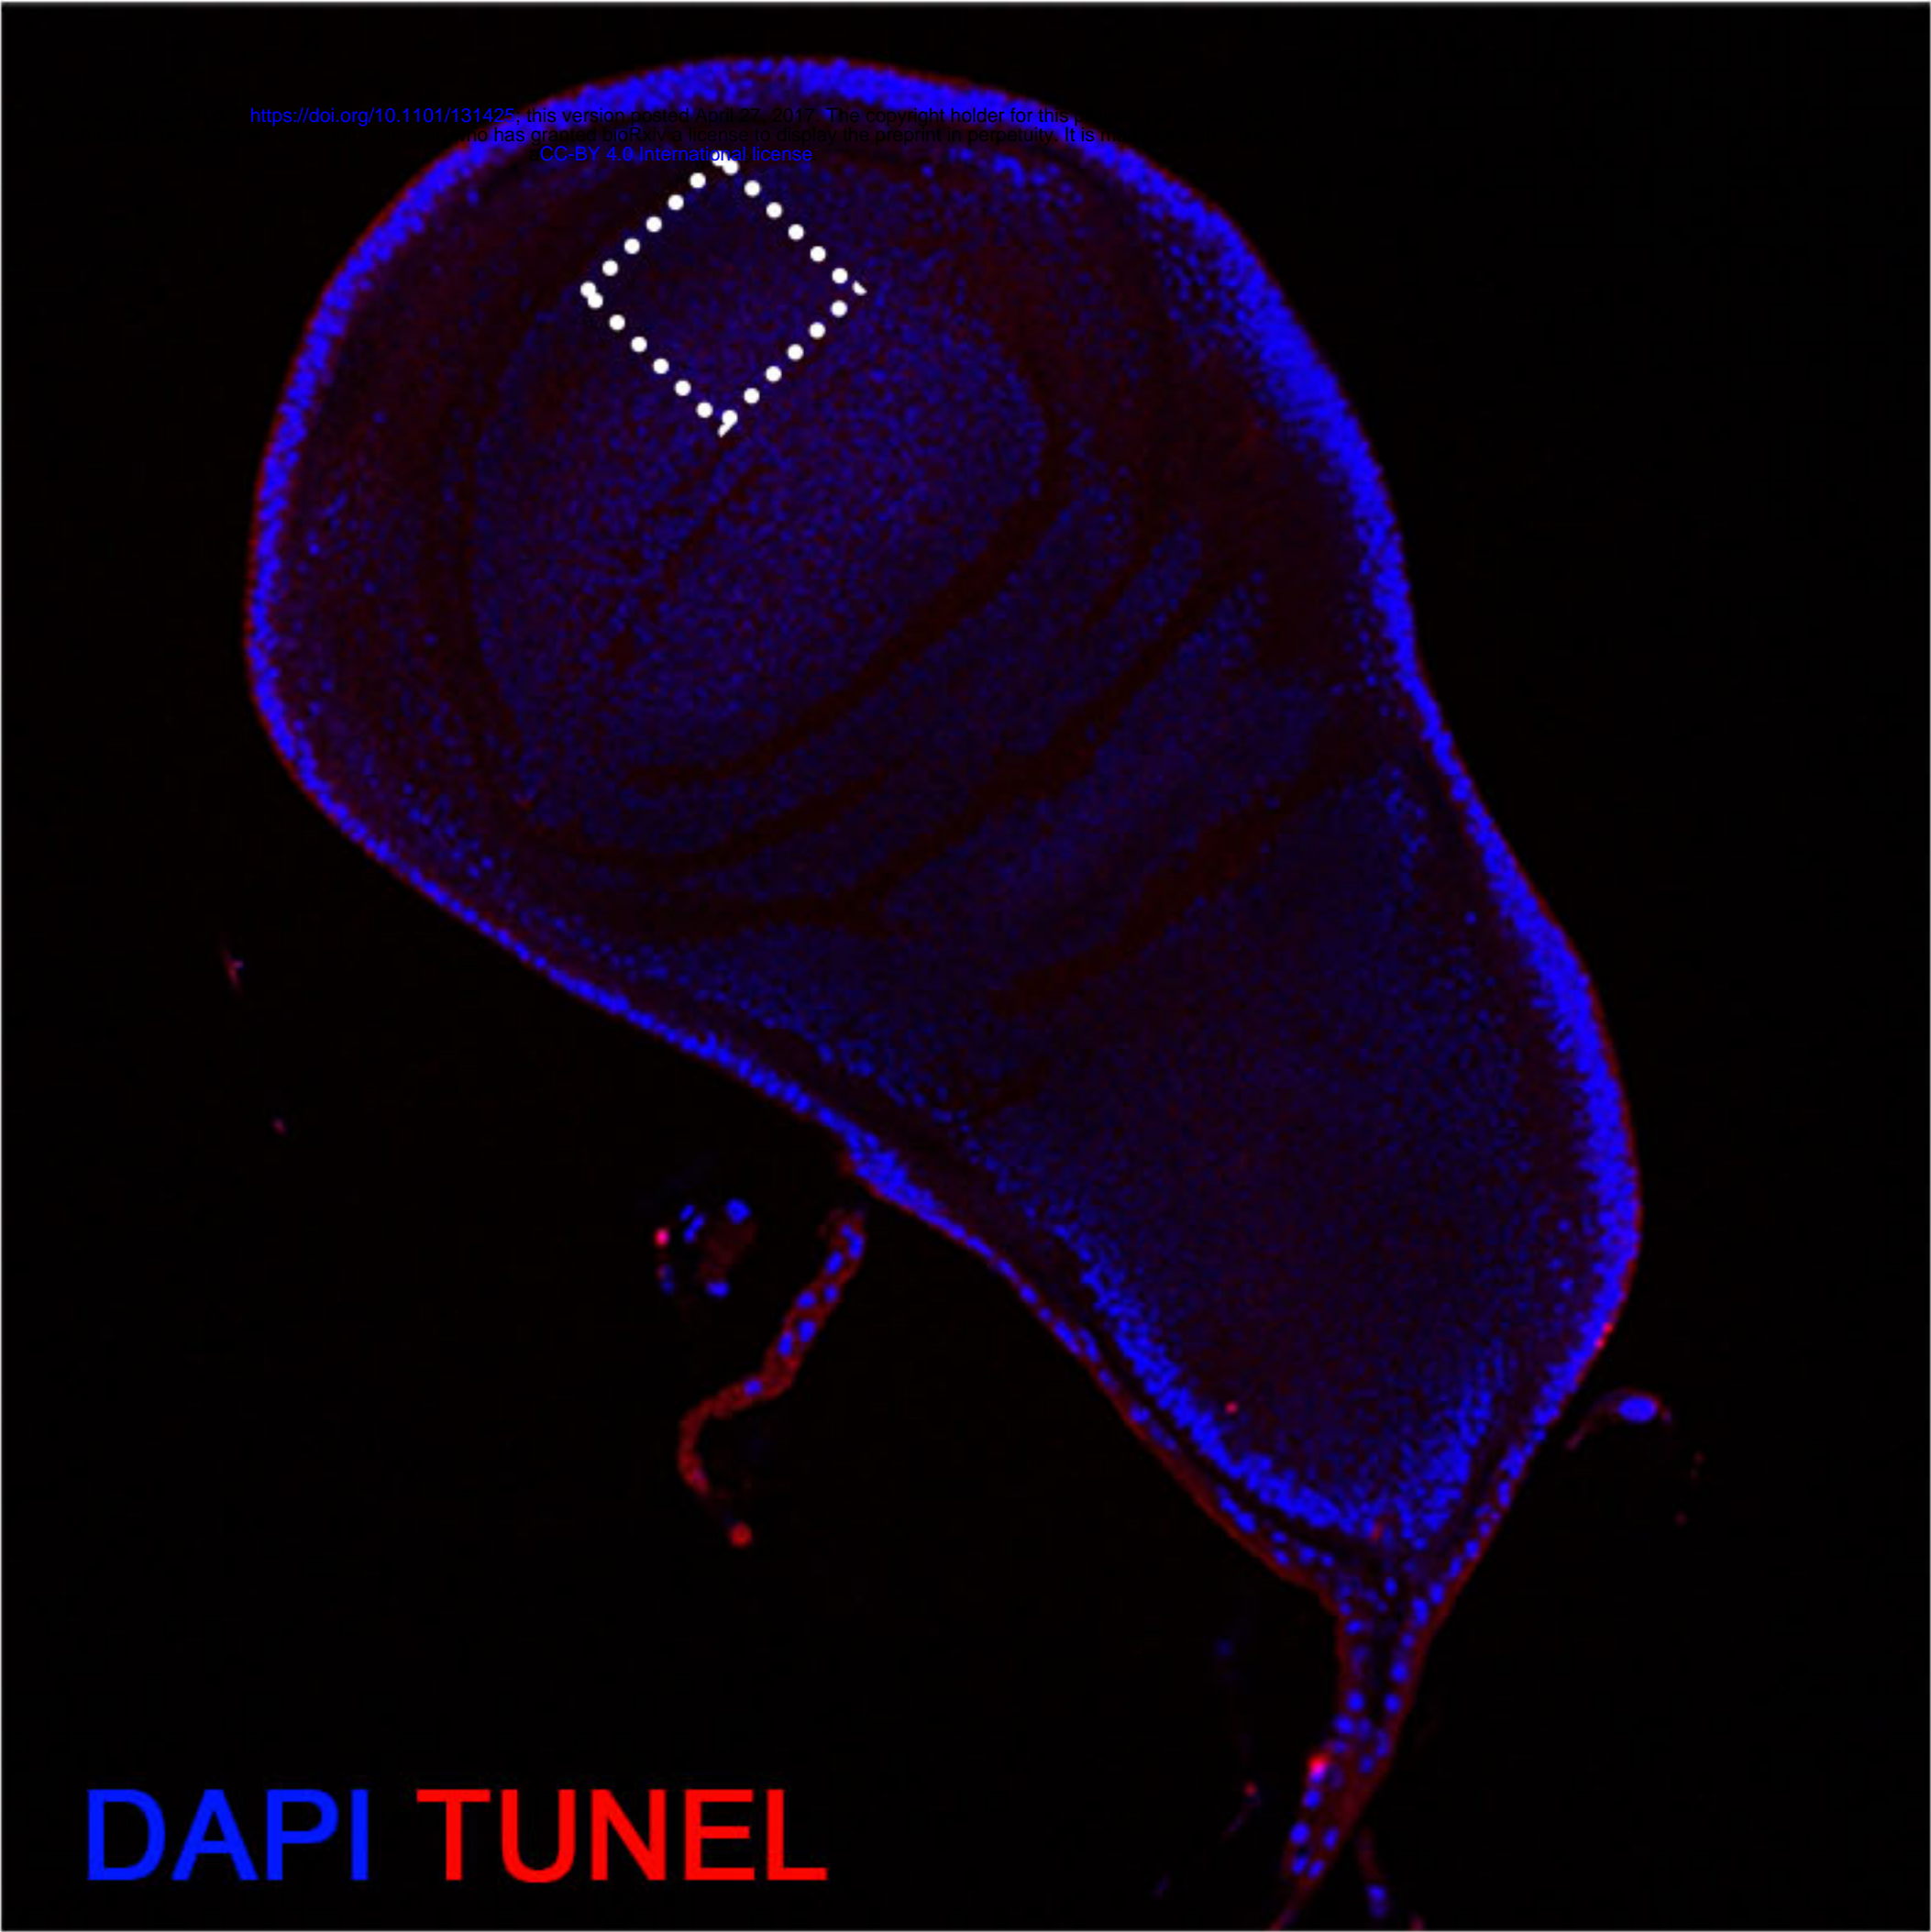

3000 rad

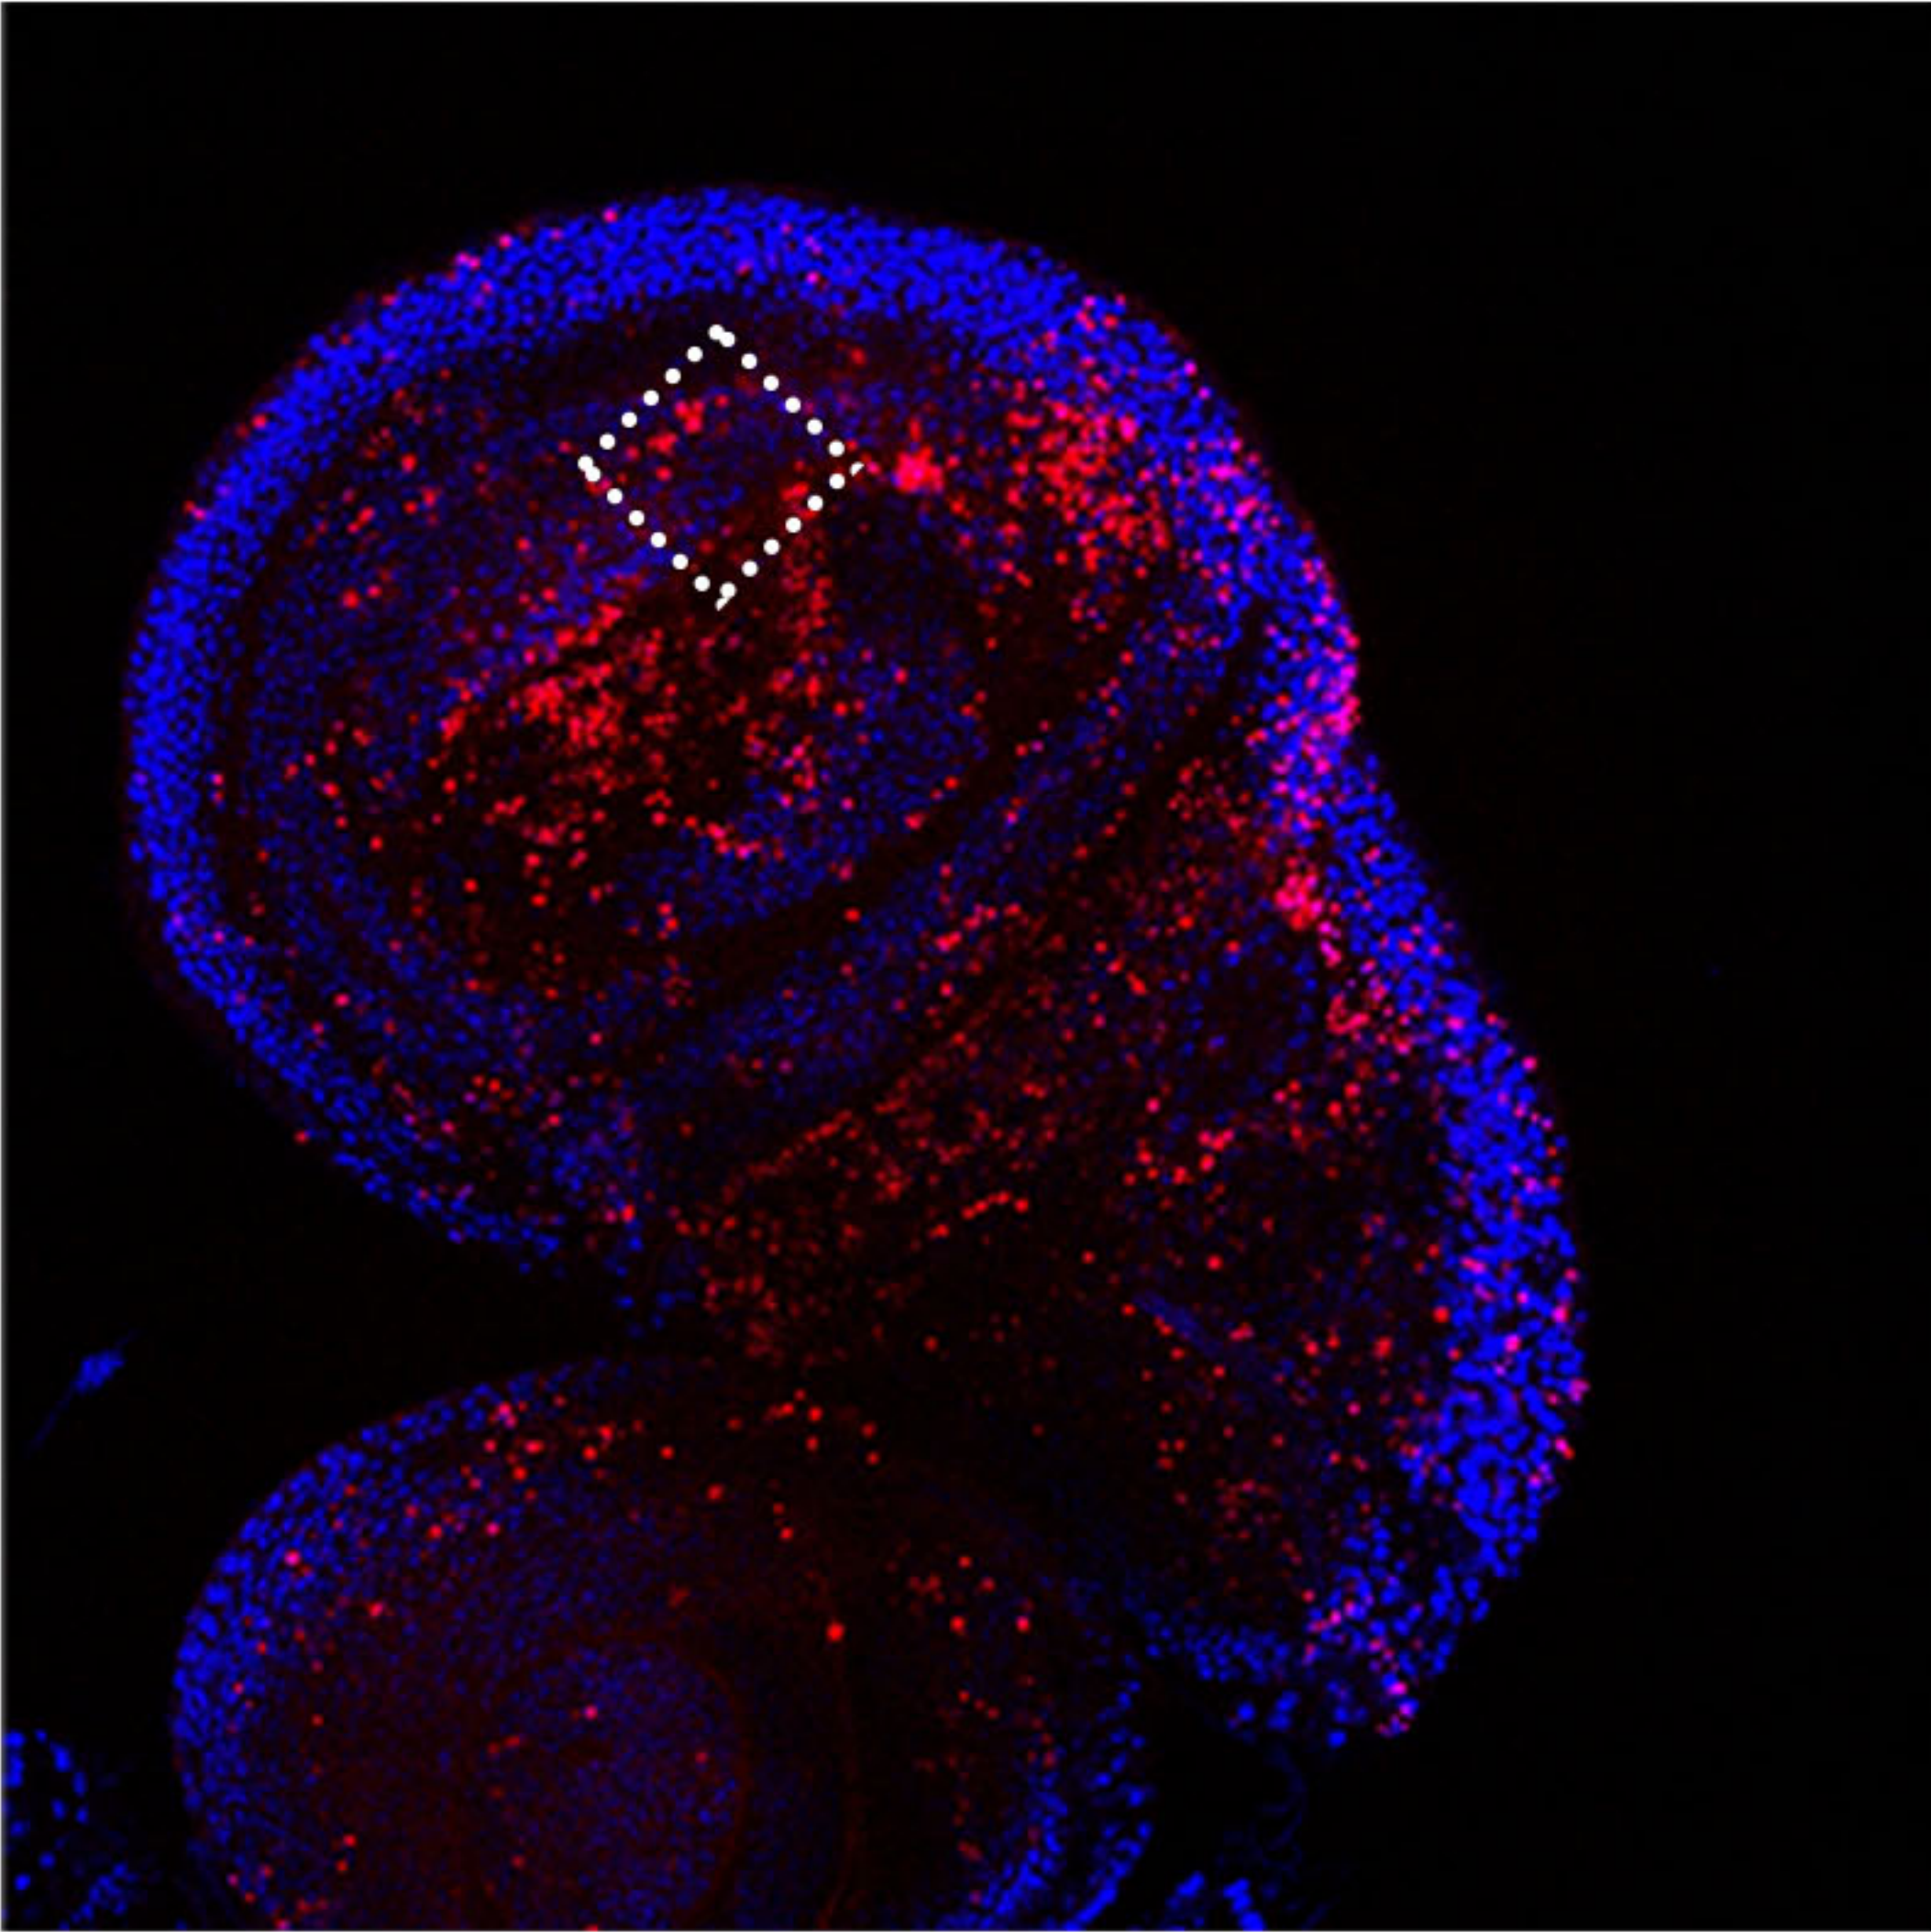



Figure 2 - Figure supplement 1

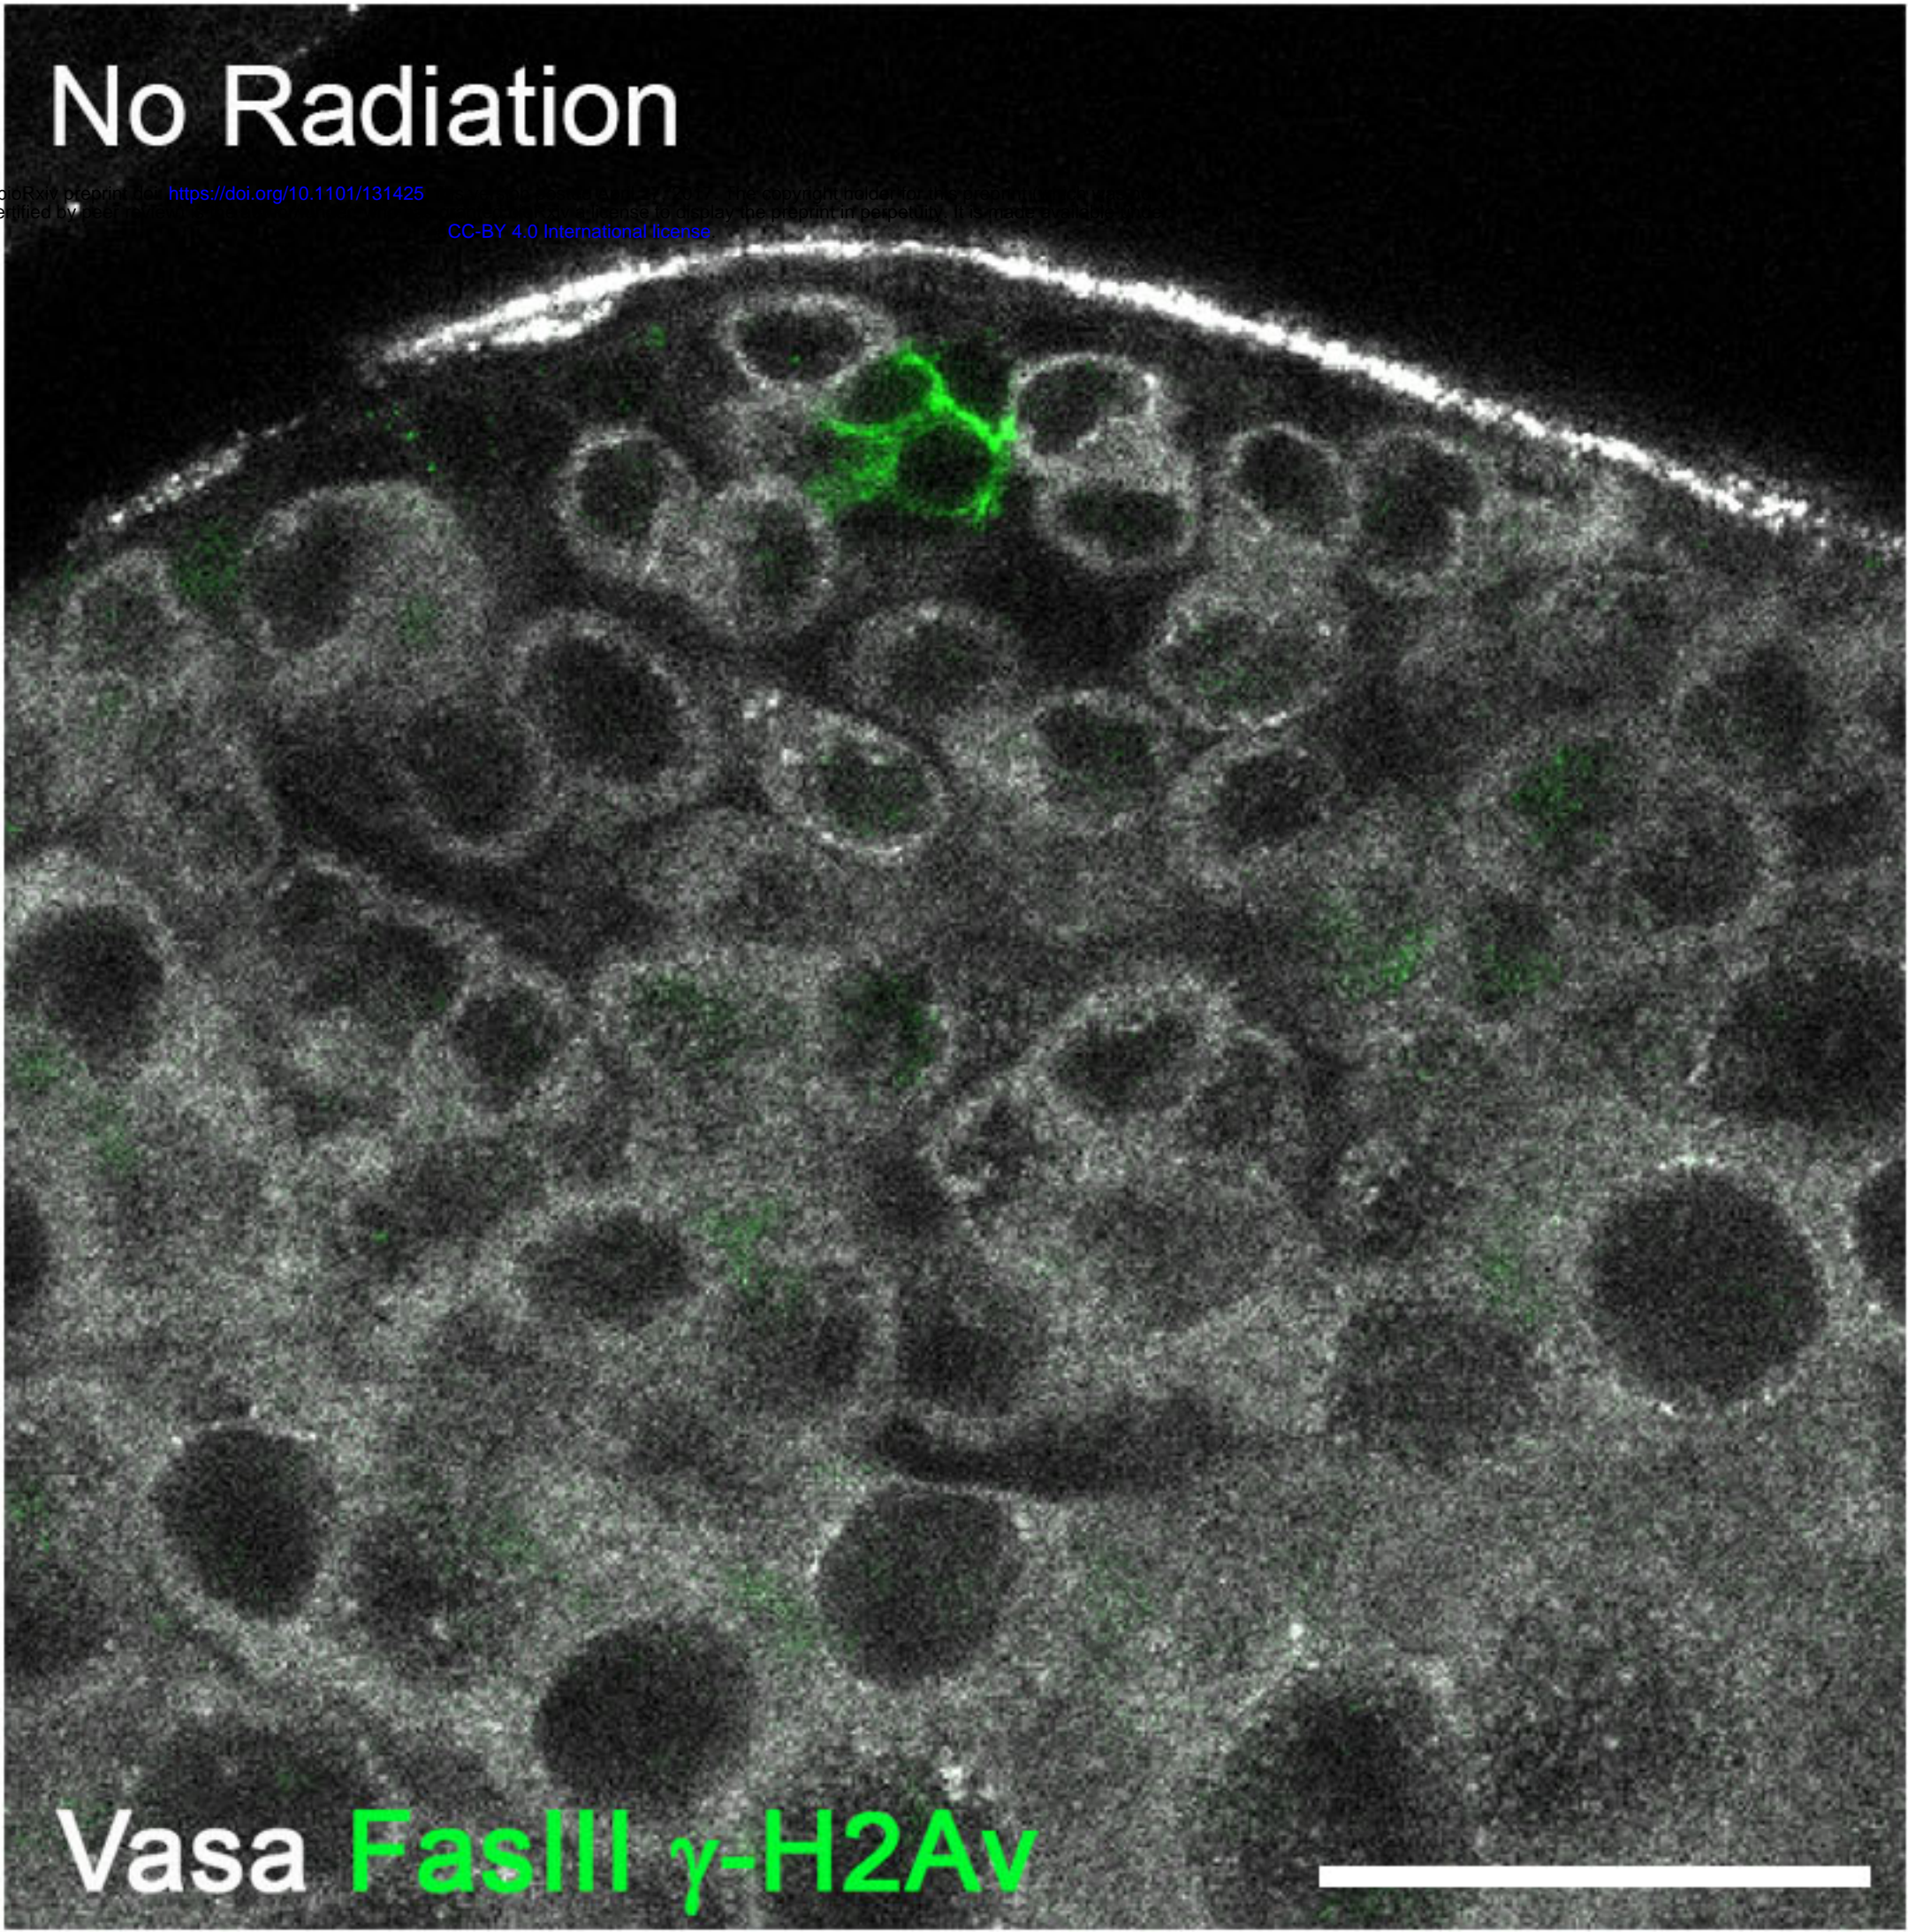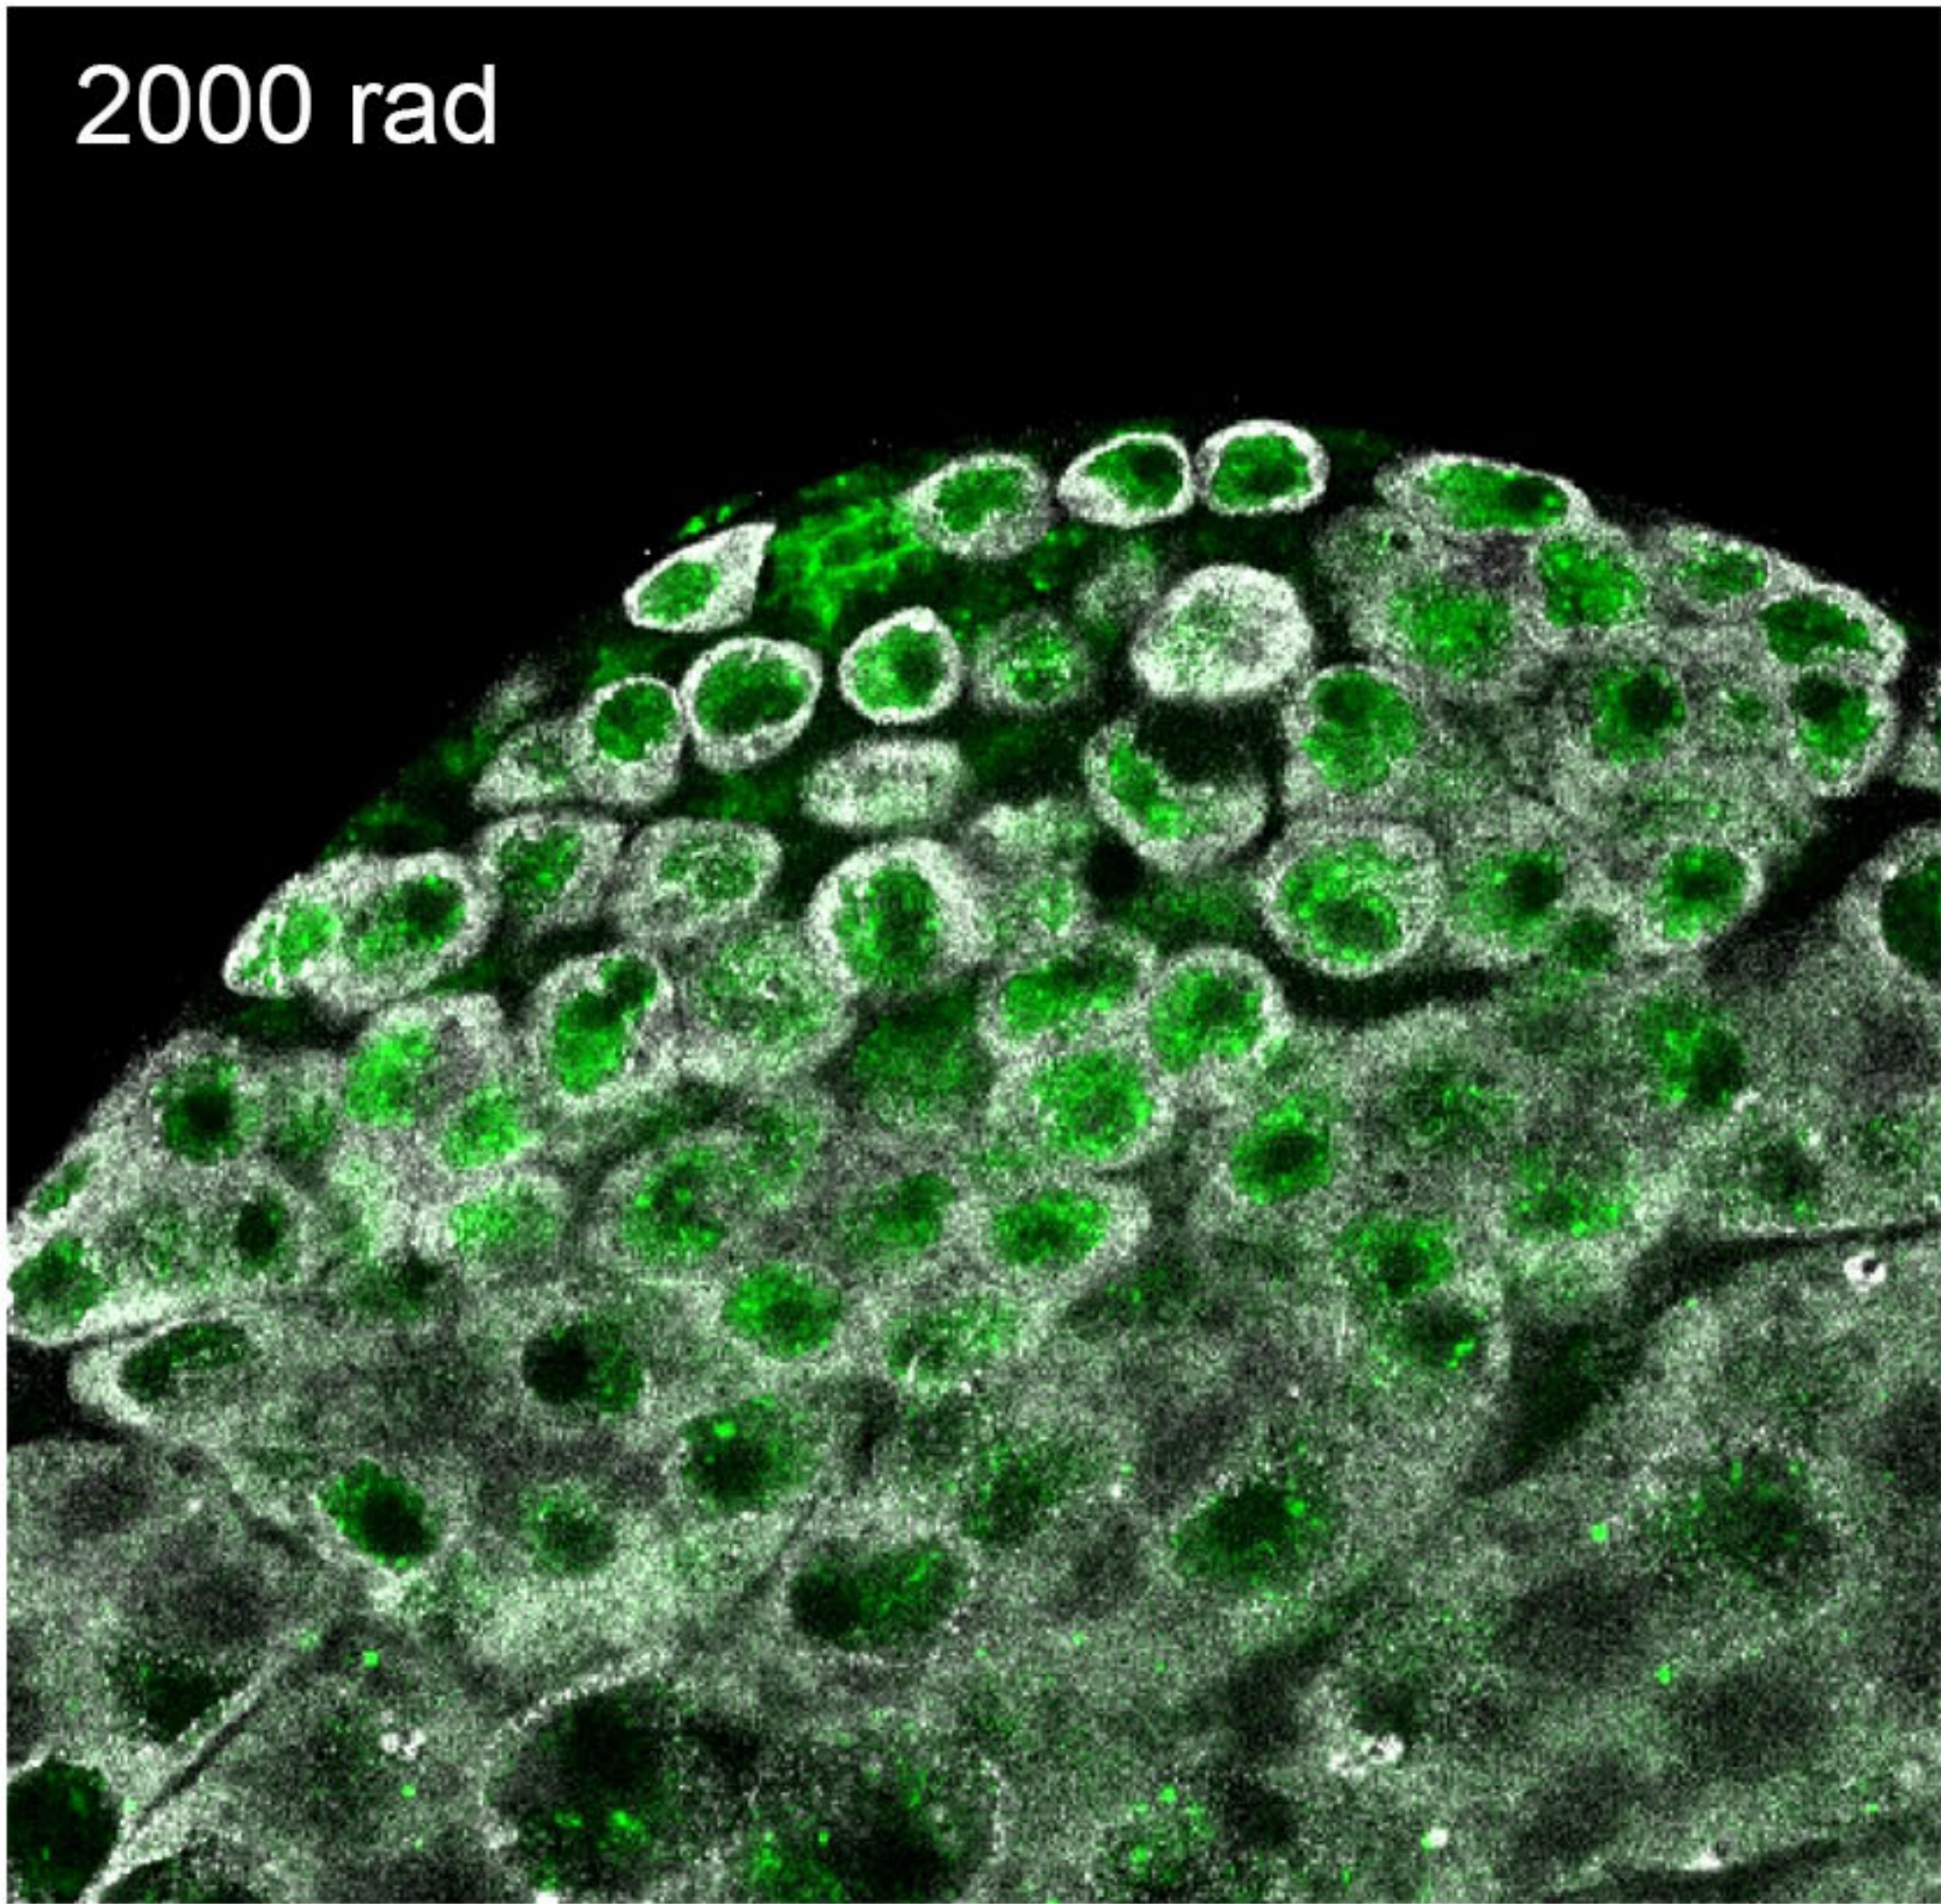



Figure 2 - Figure supplement 2

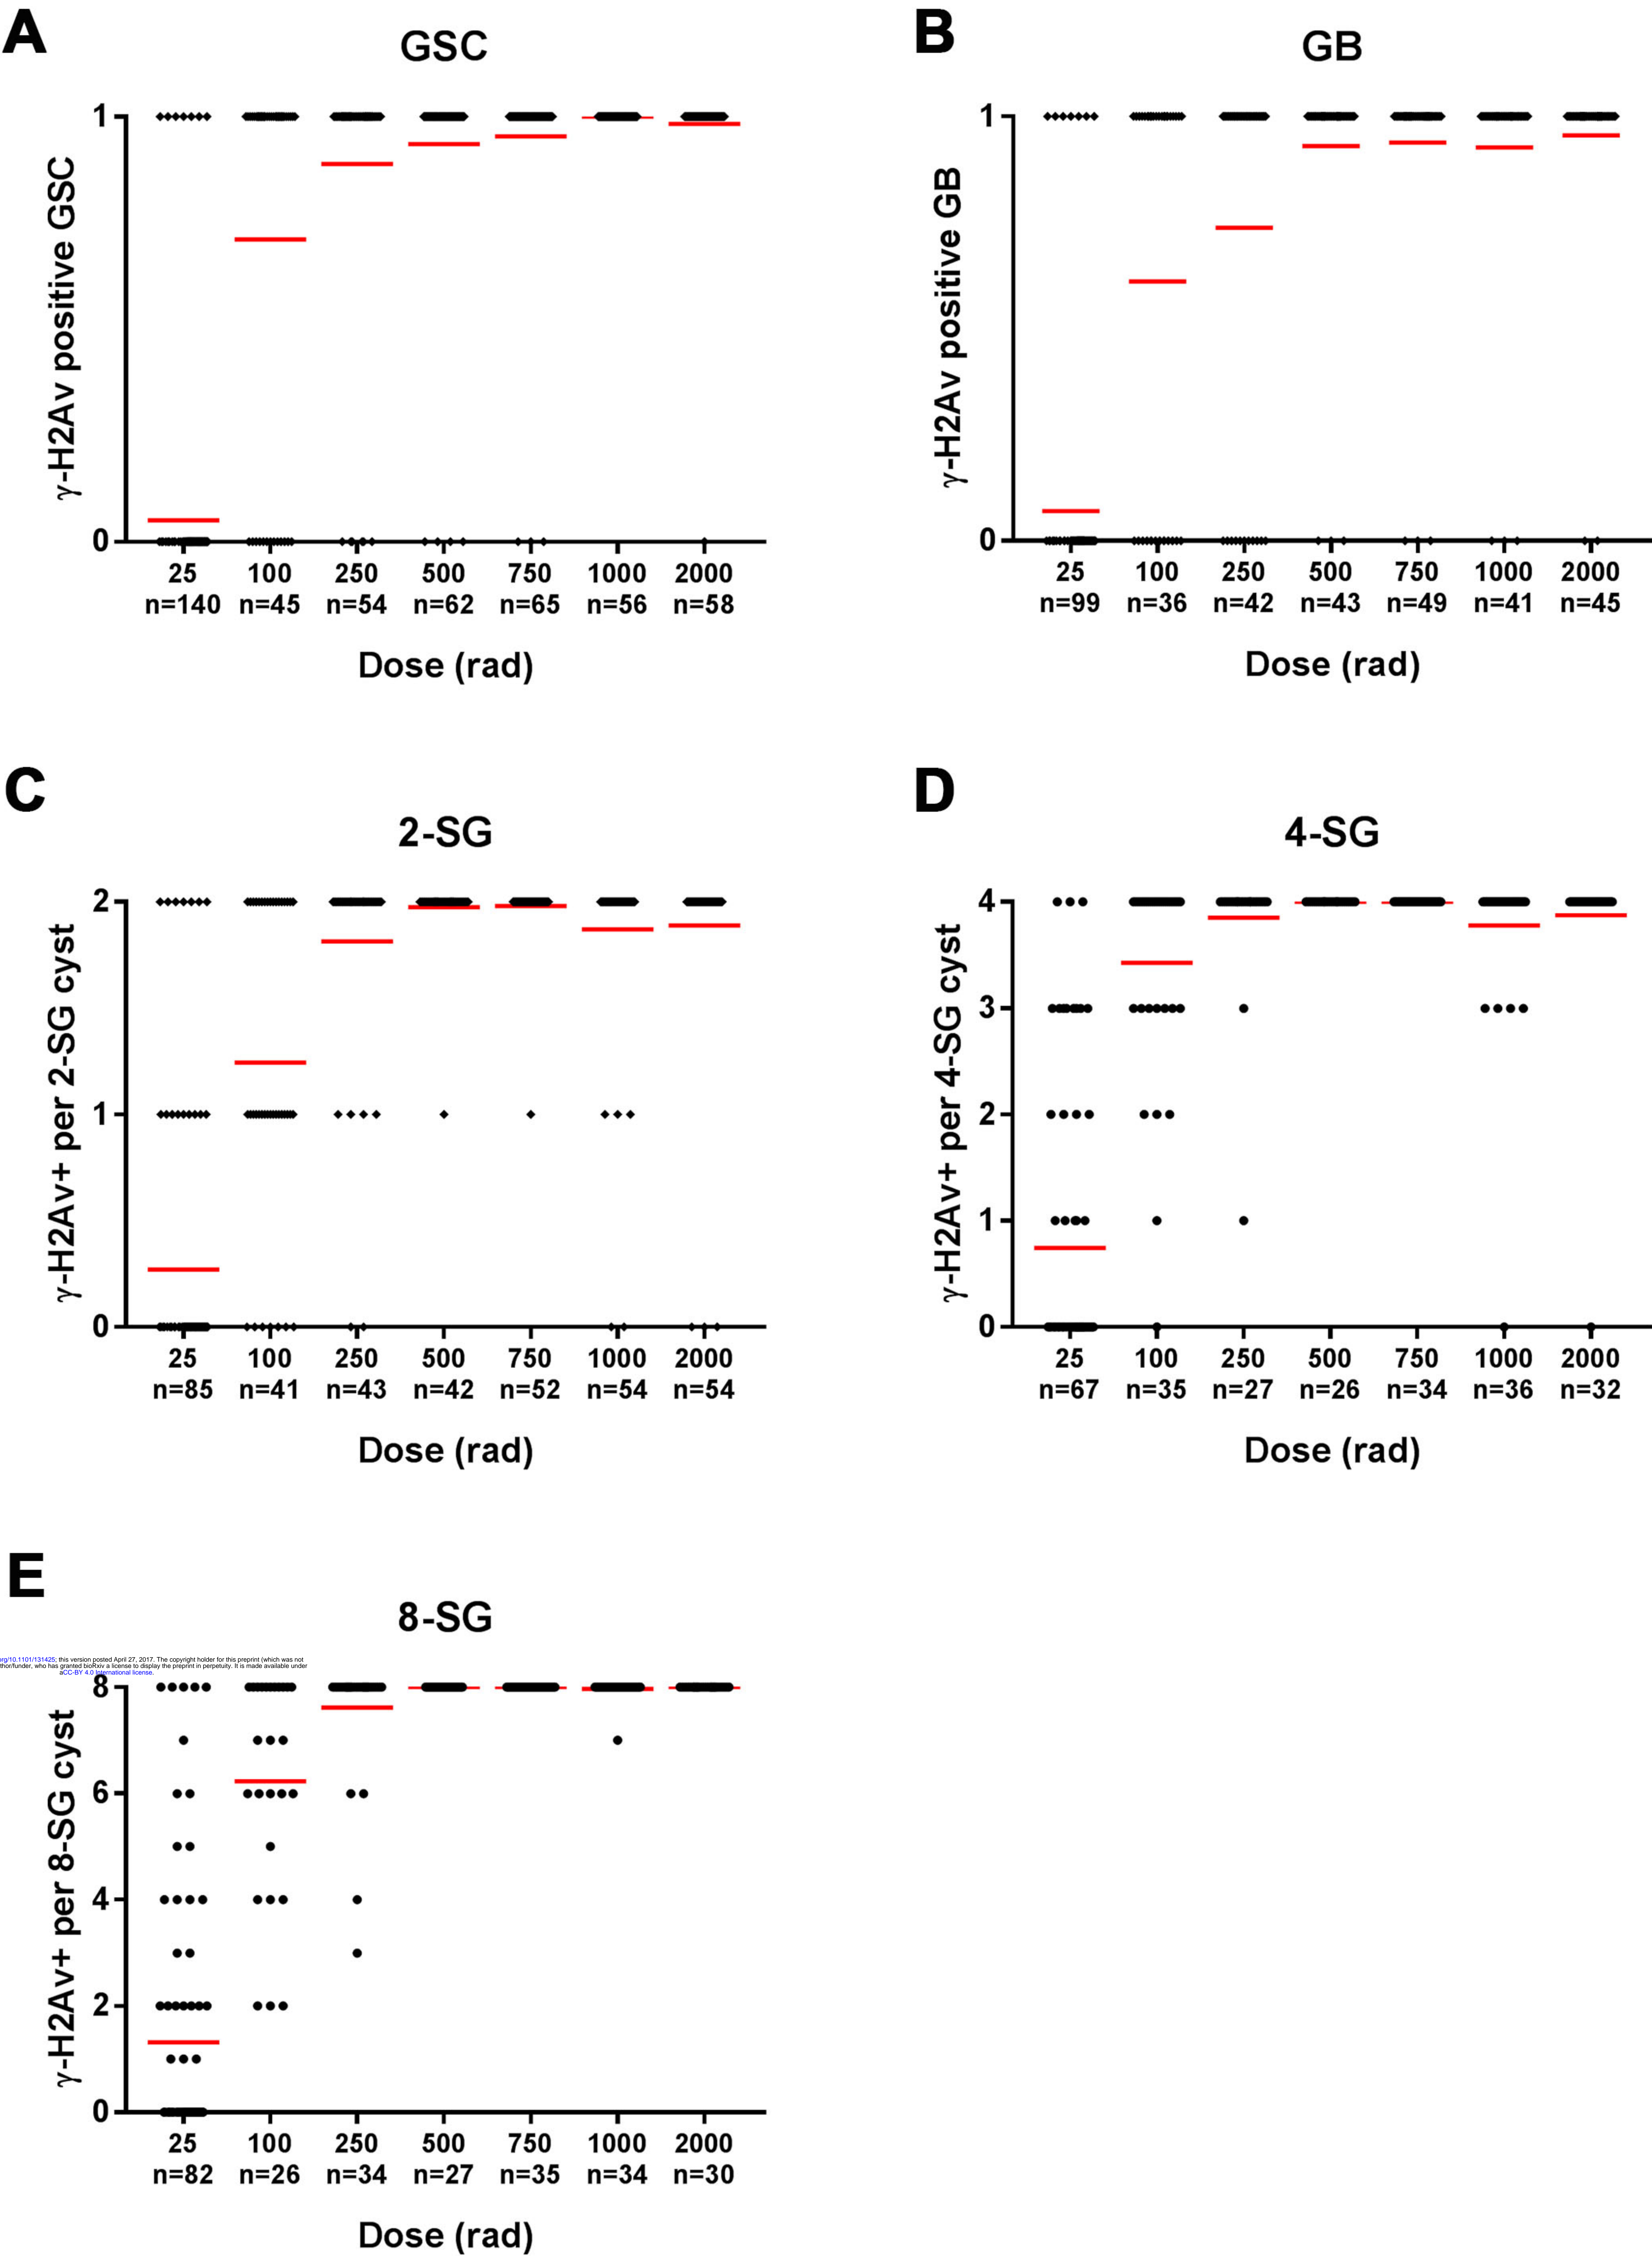



Figure 3 - Figure supplement 1

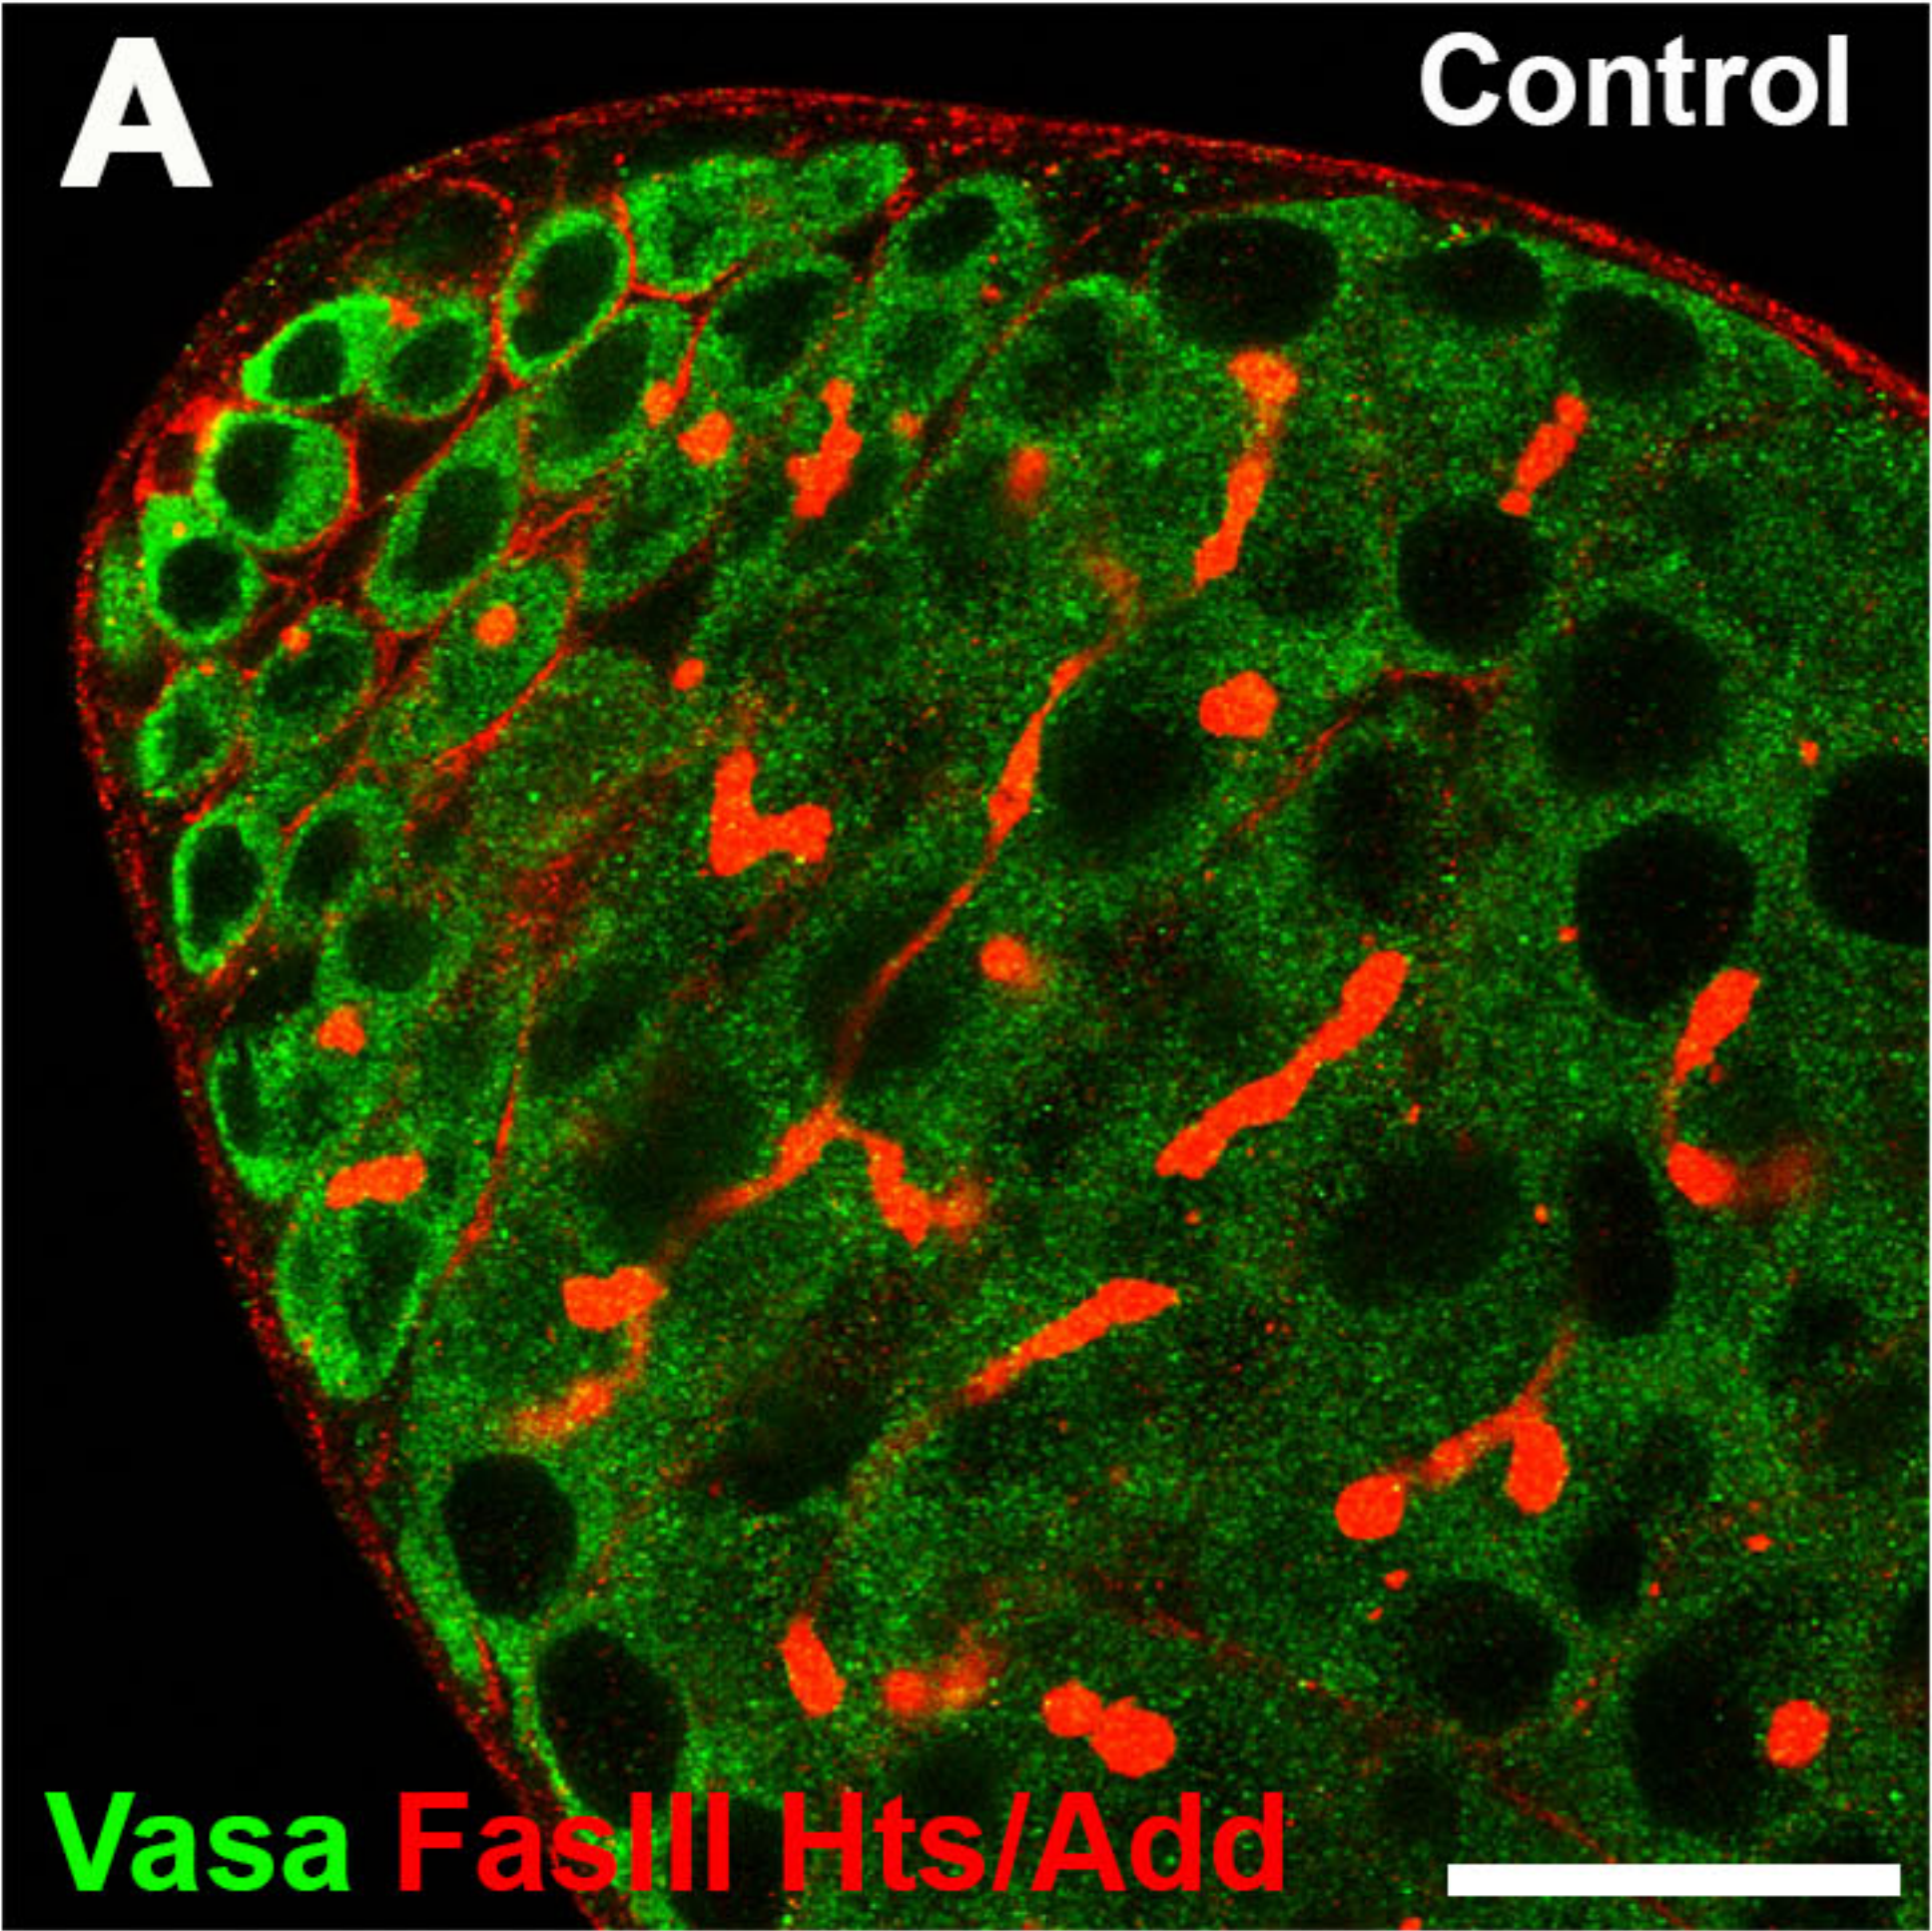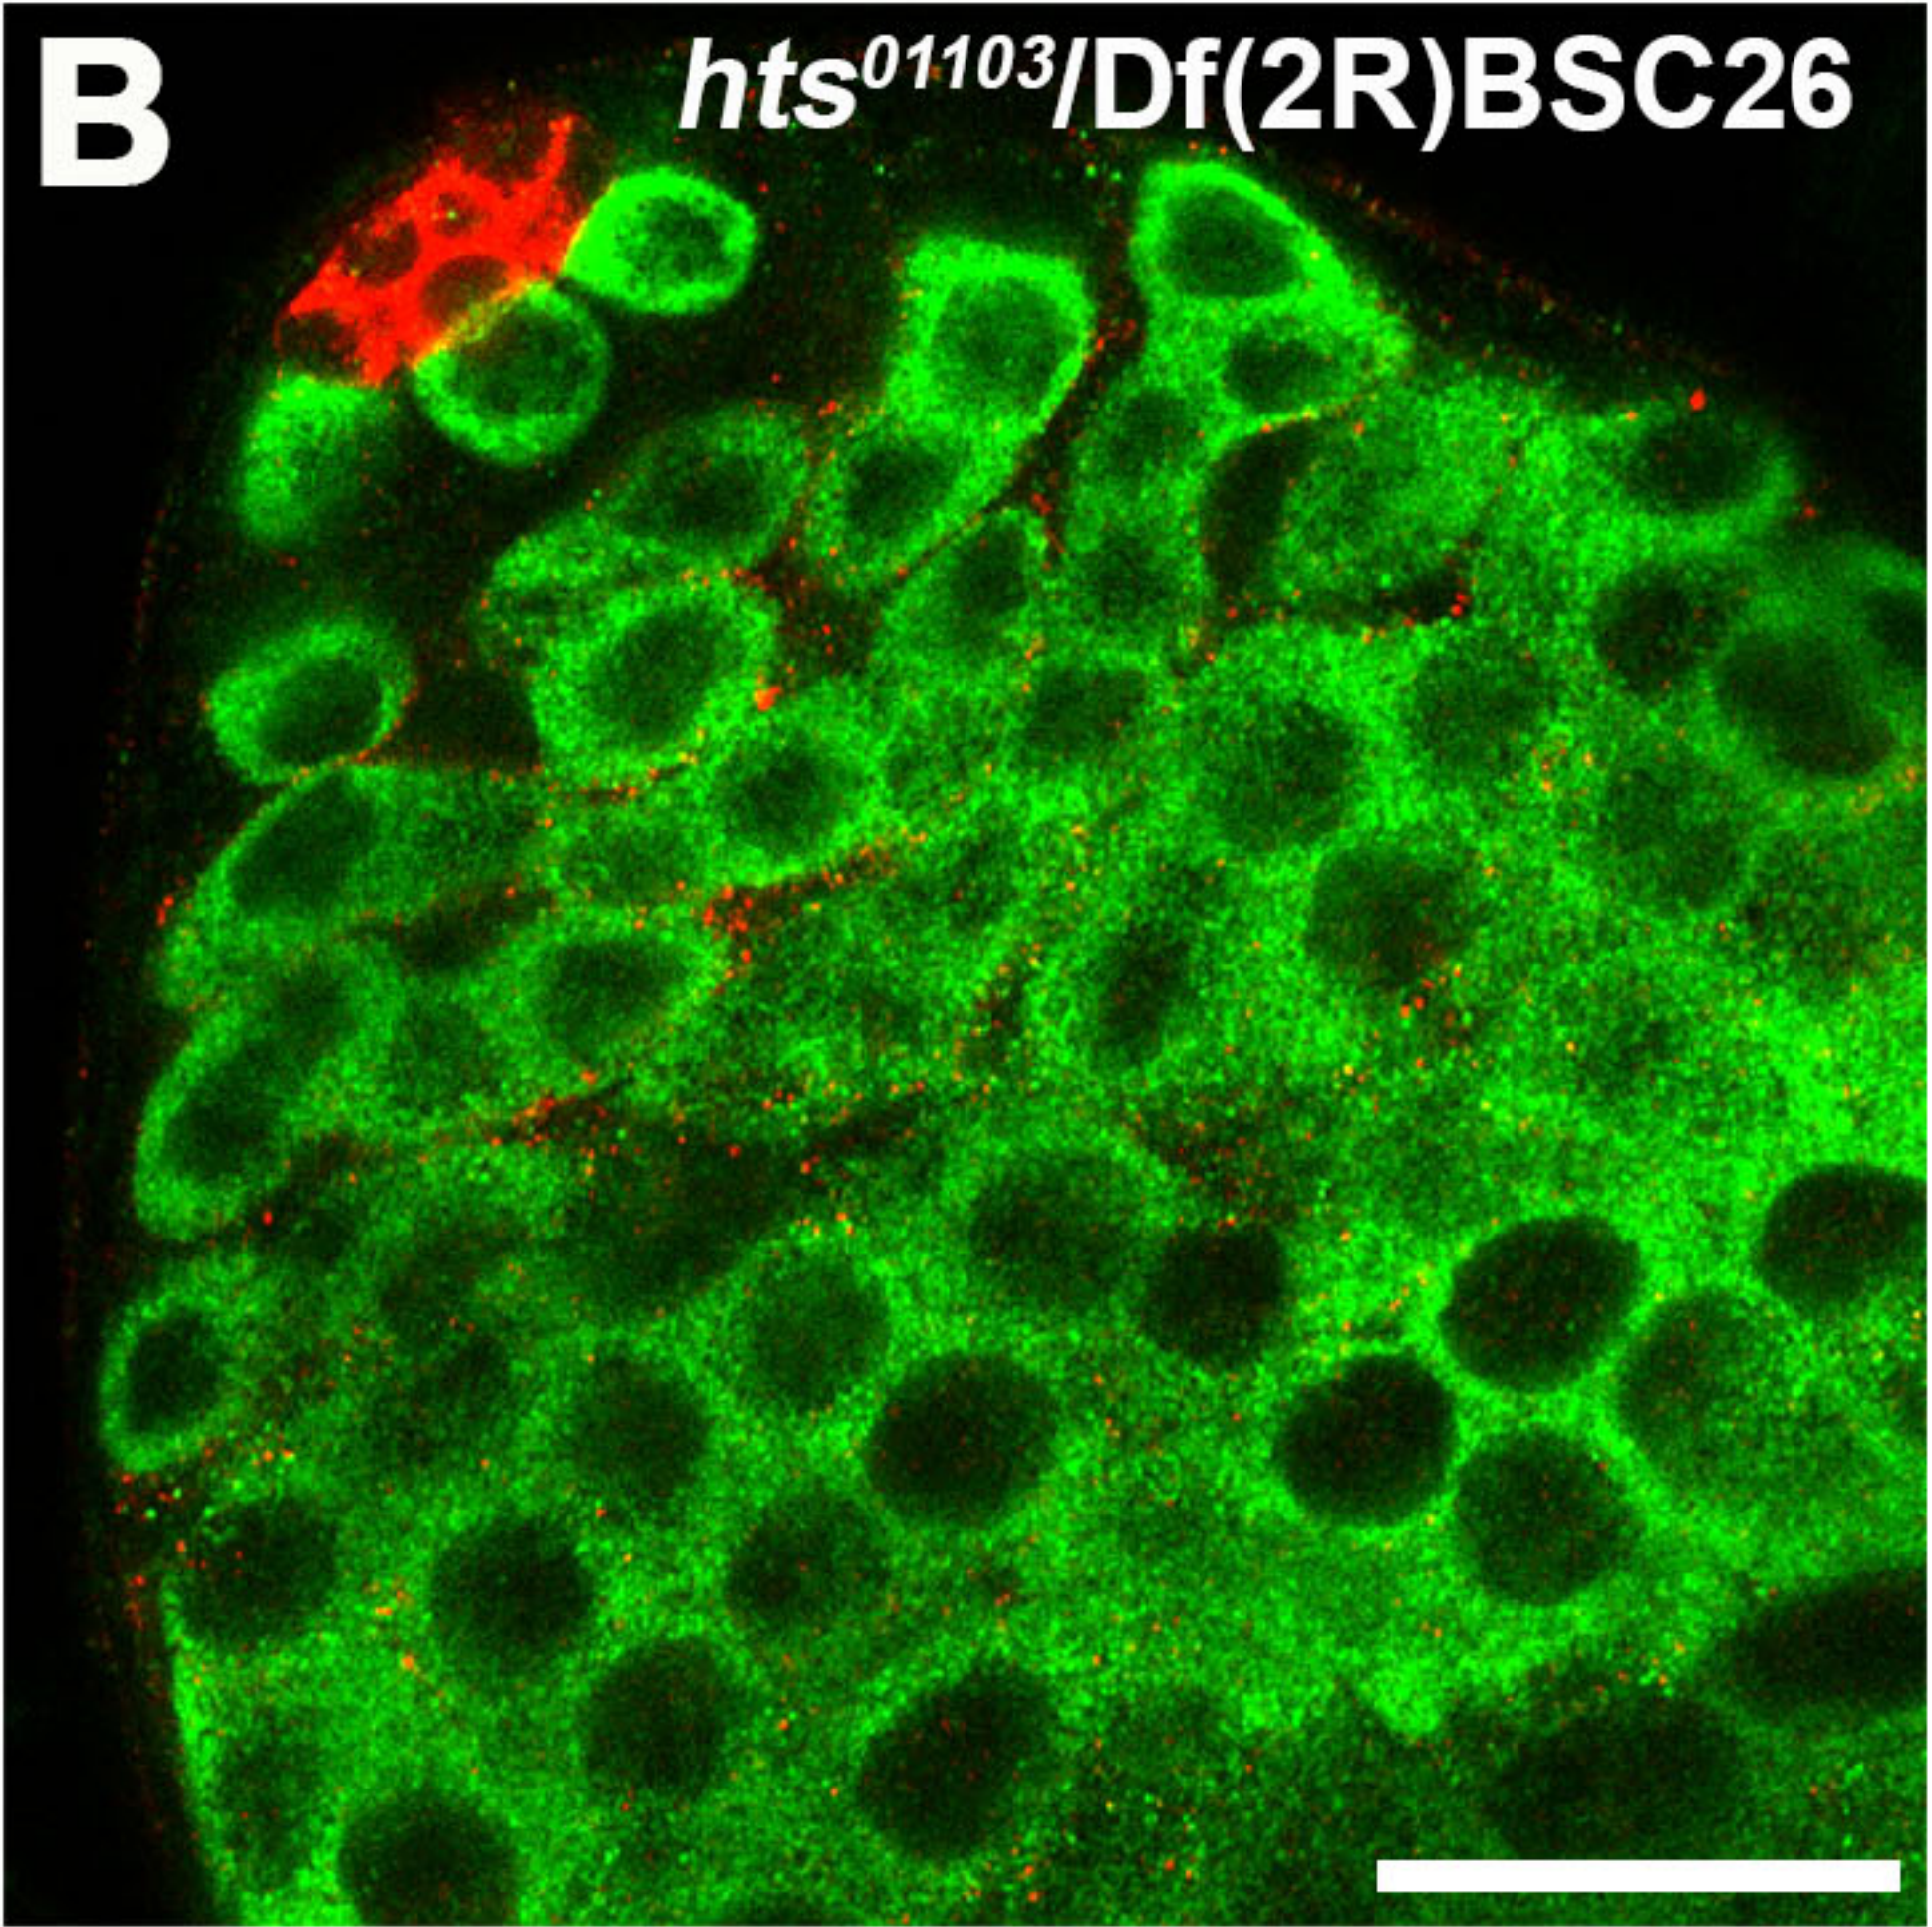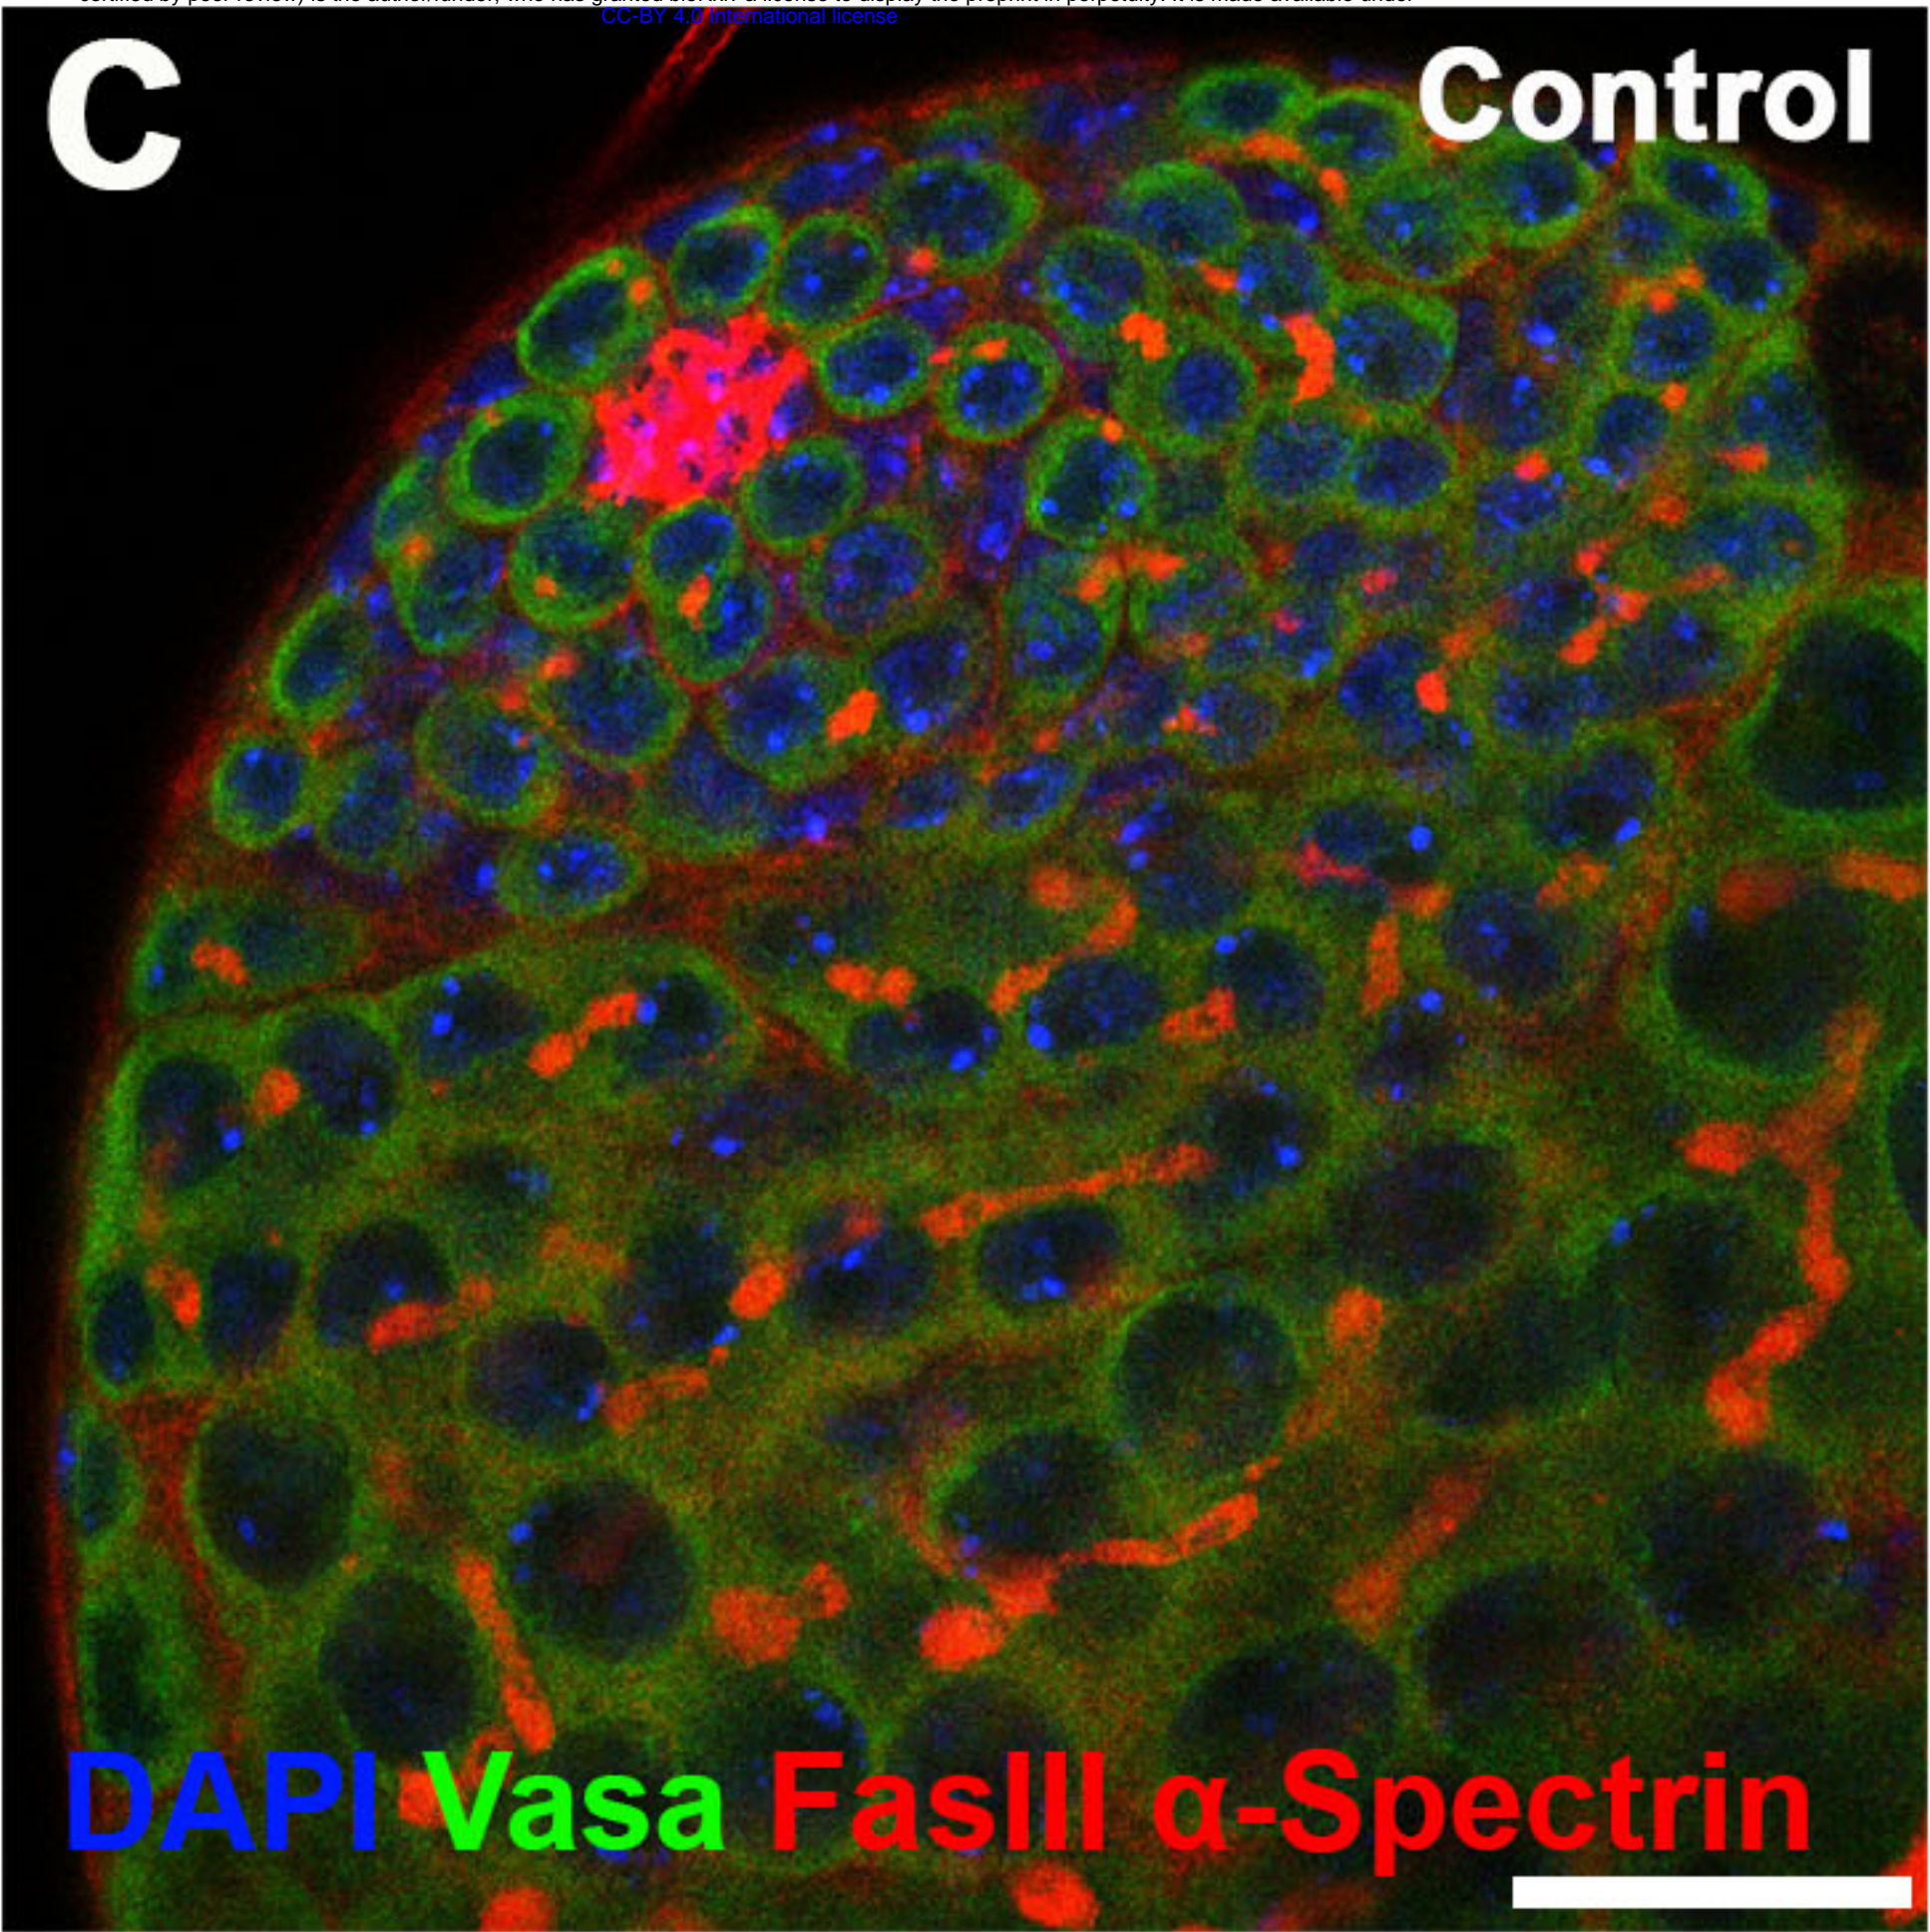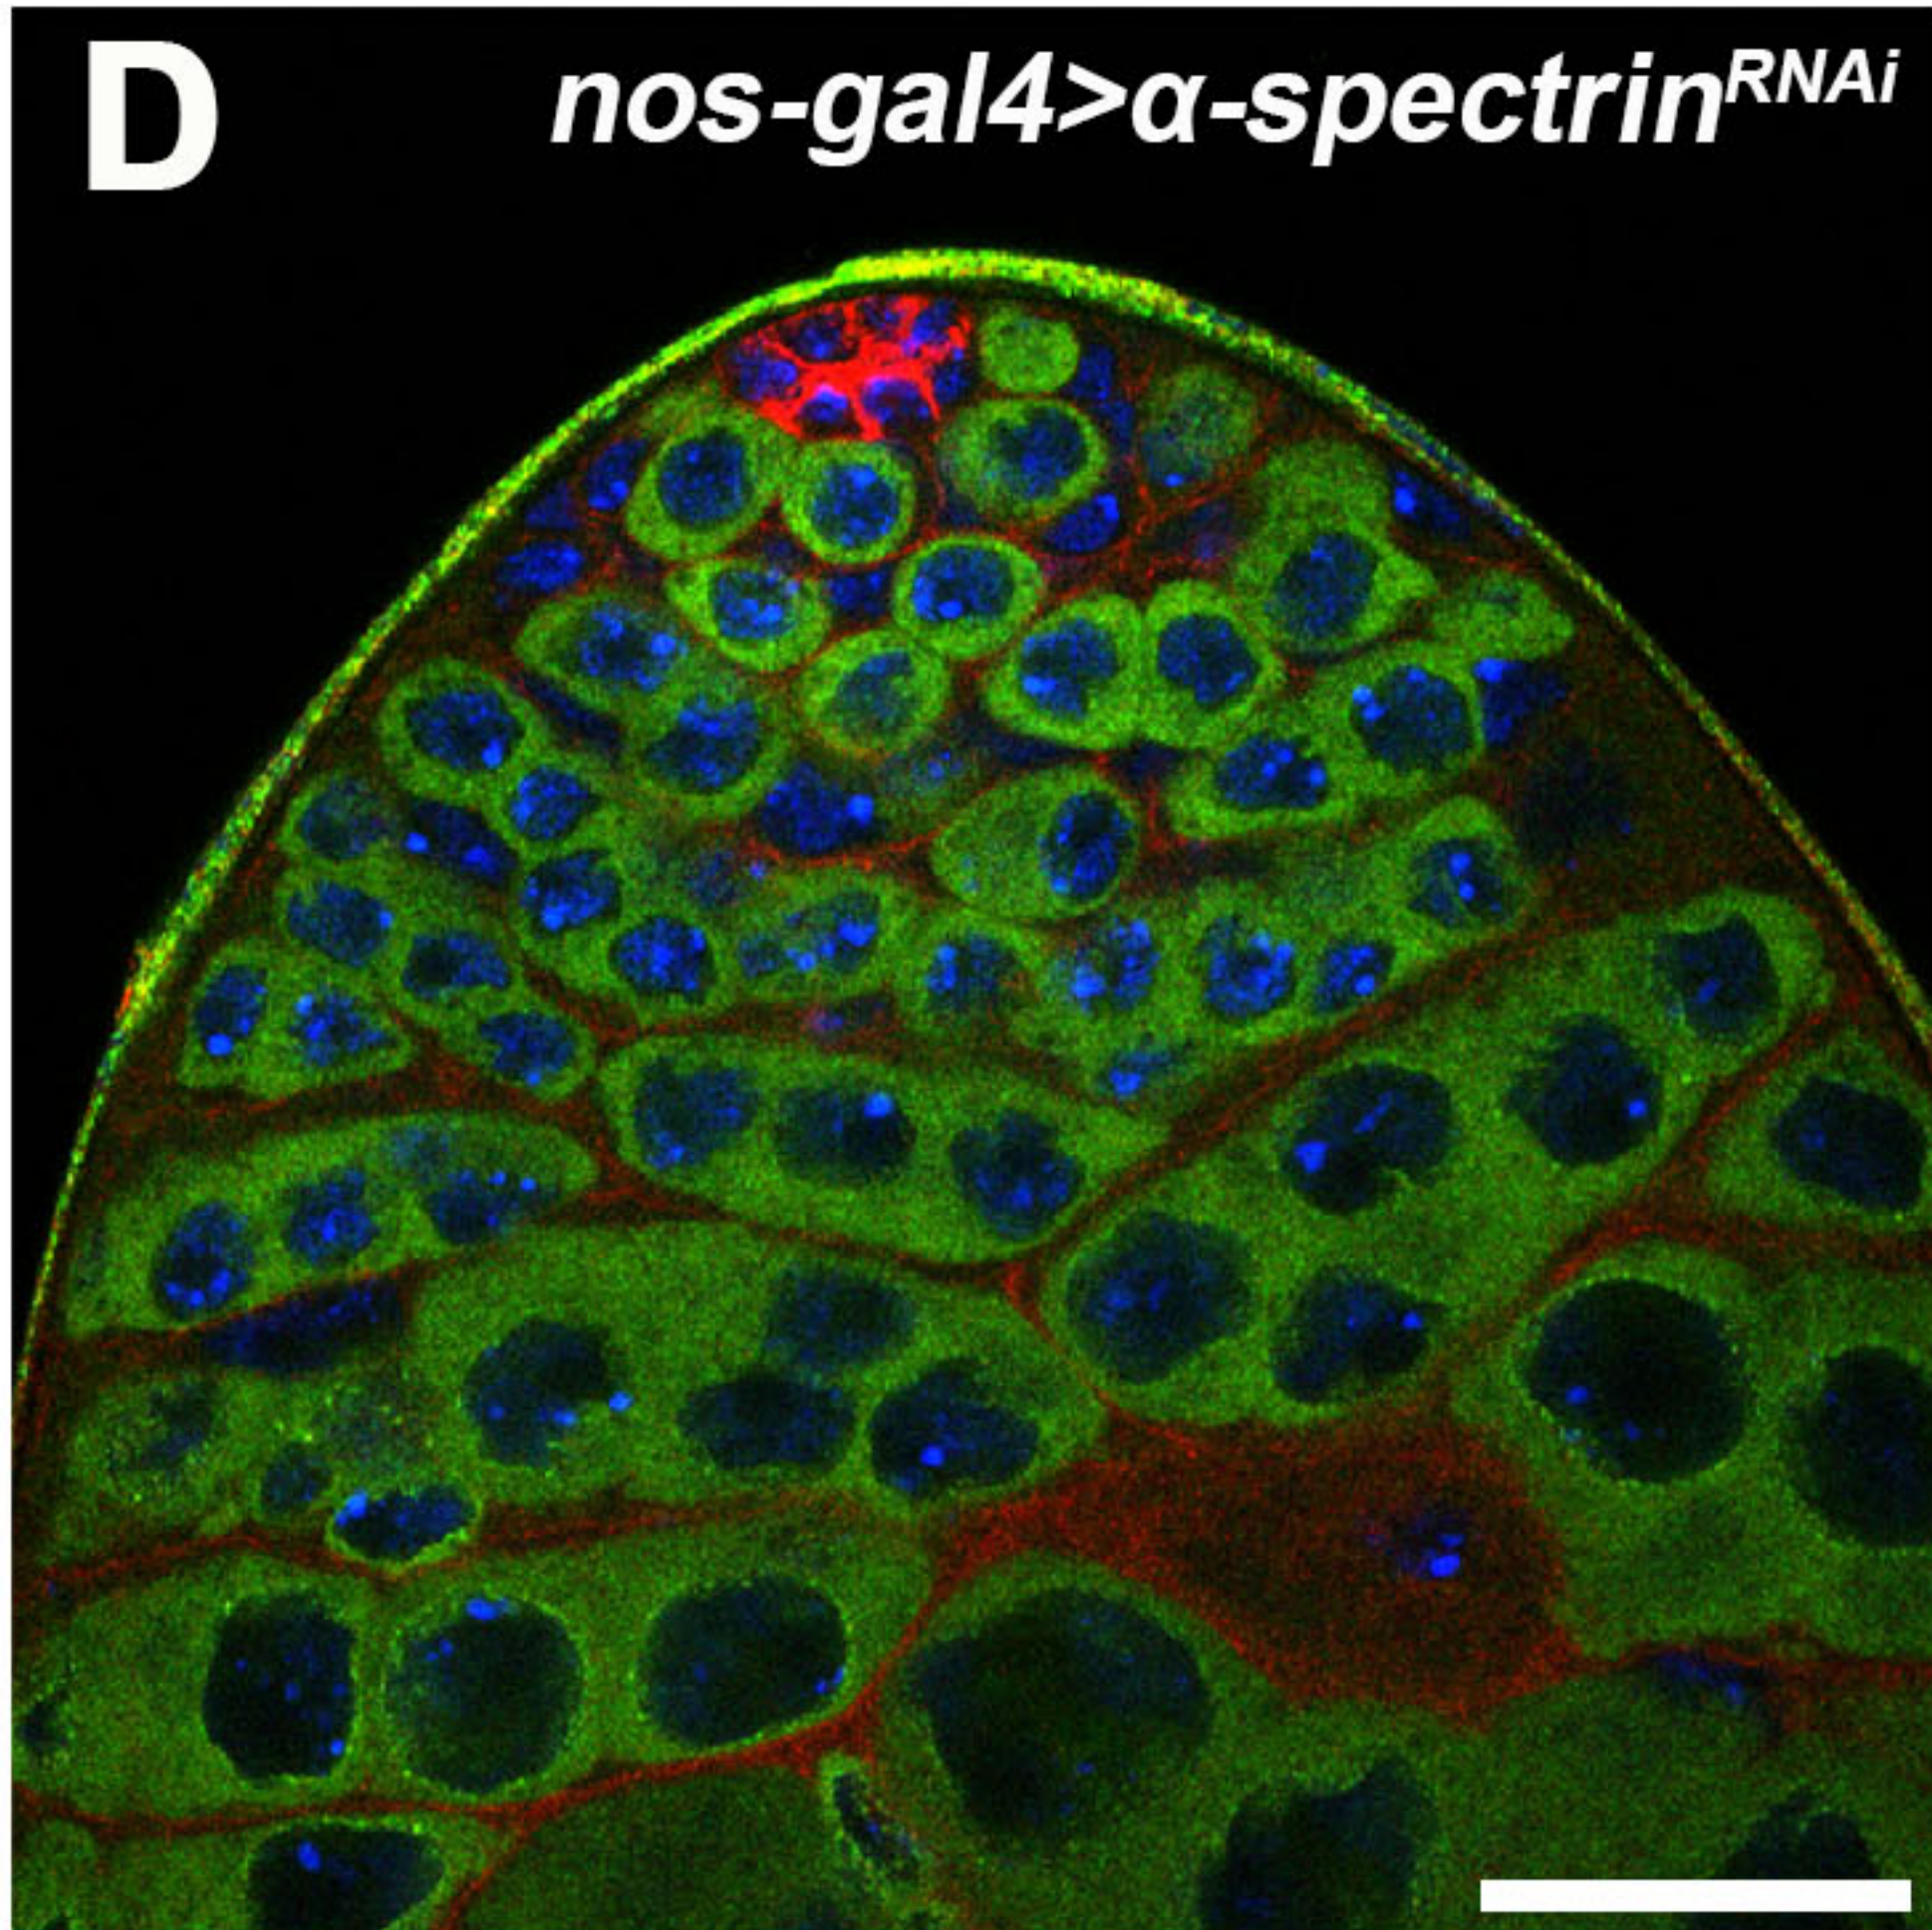



Figure 5 - Figure supplement 1

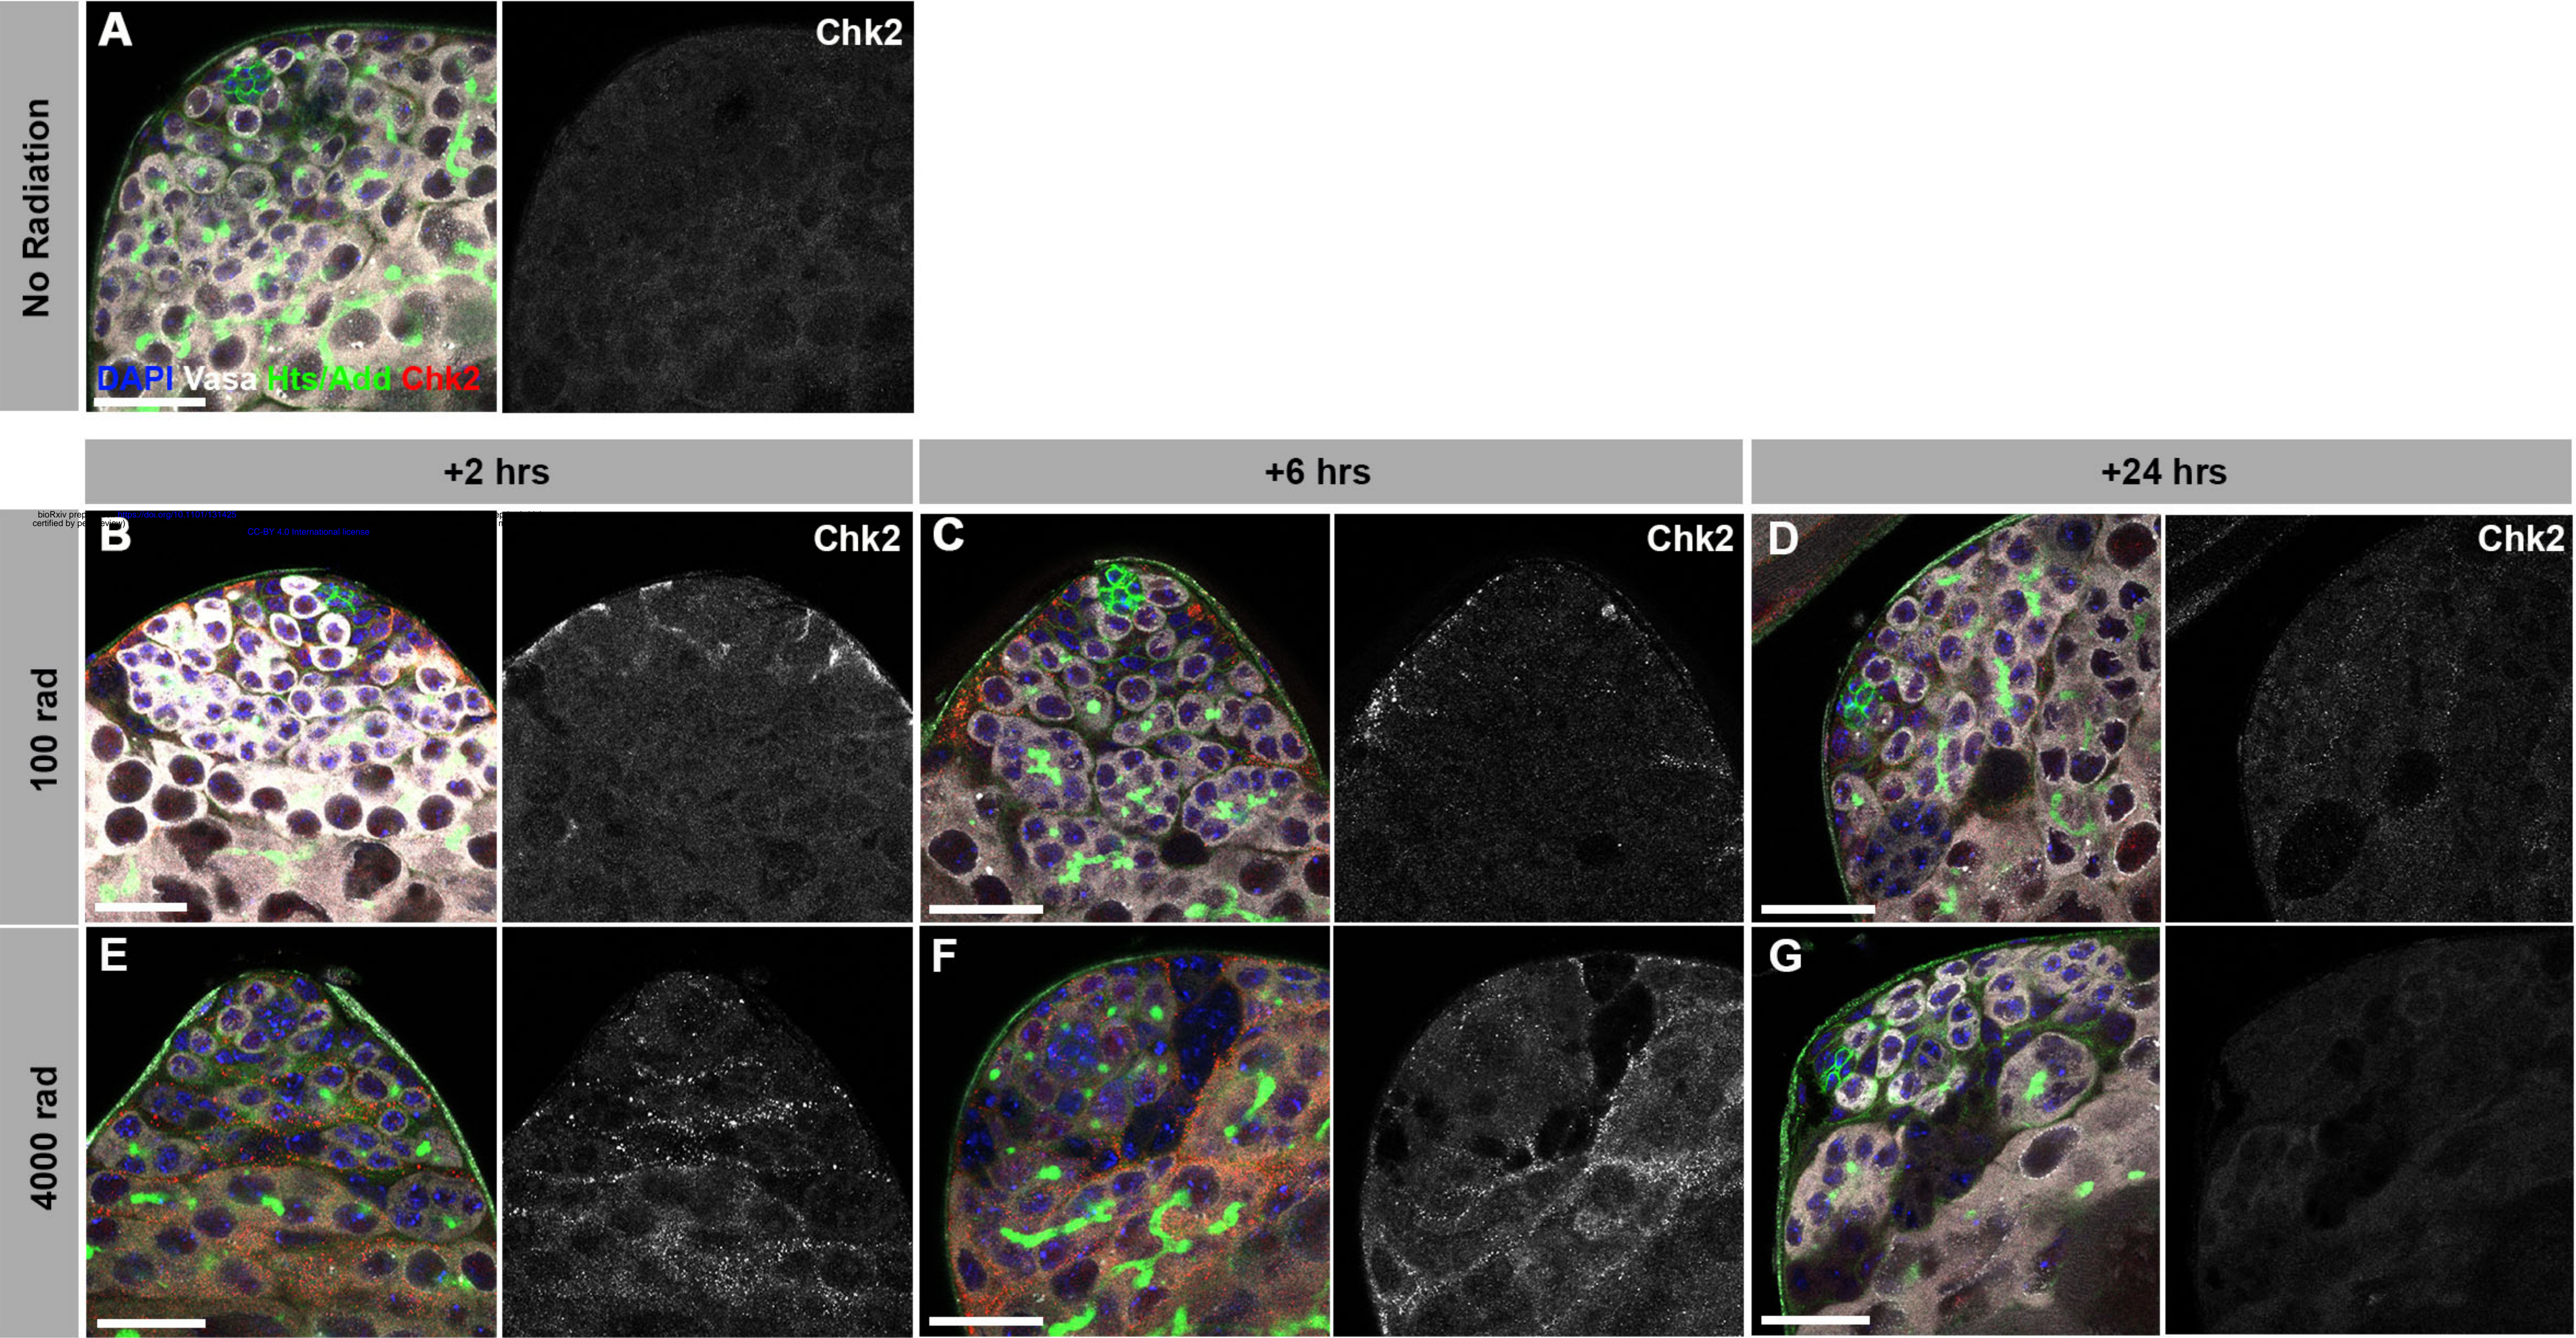



Figure 5 -Figure supplement 2

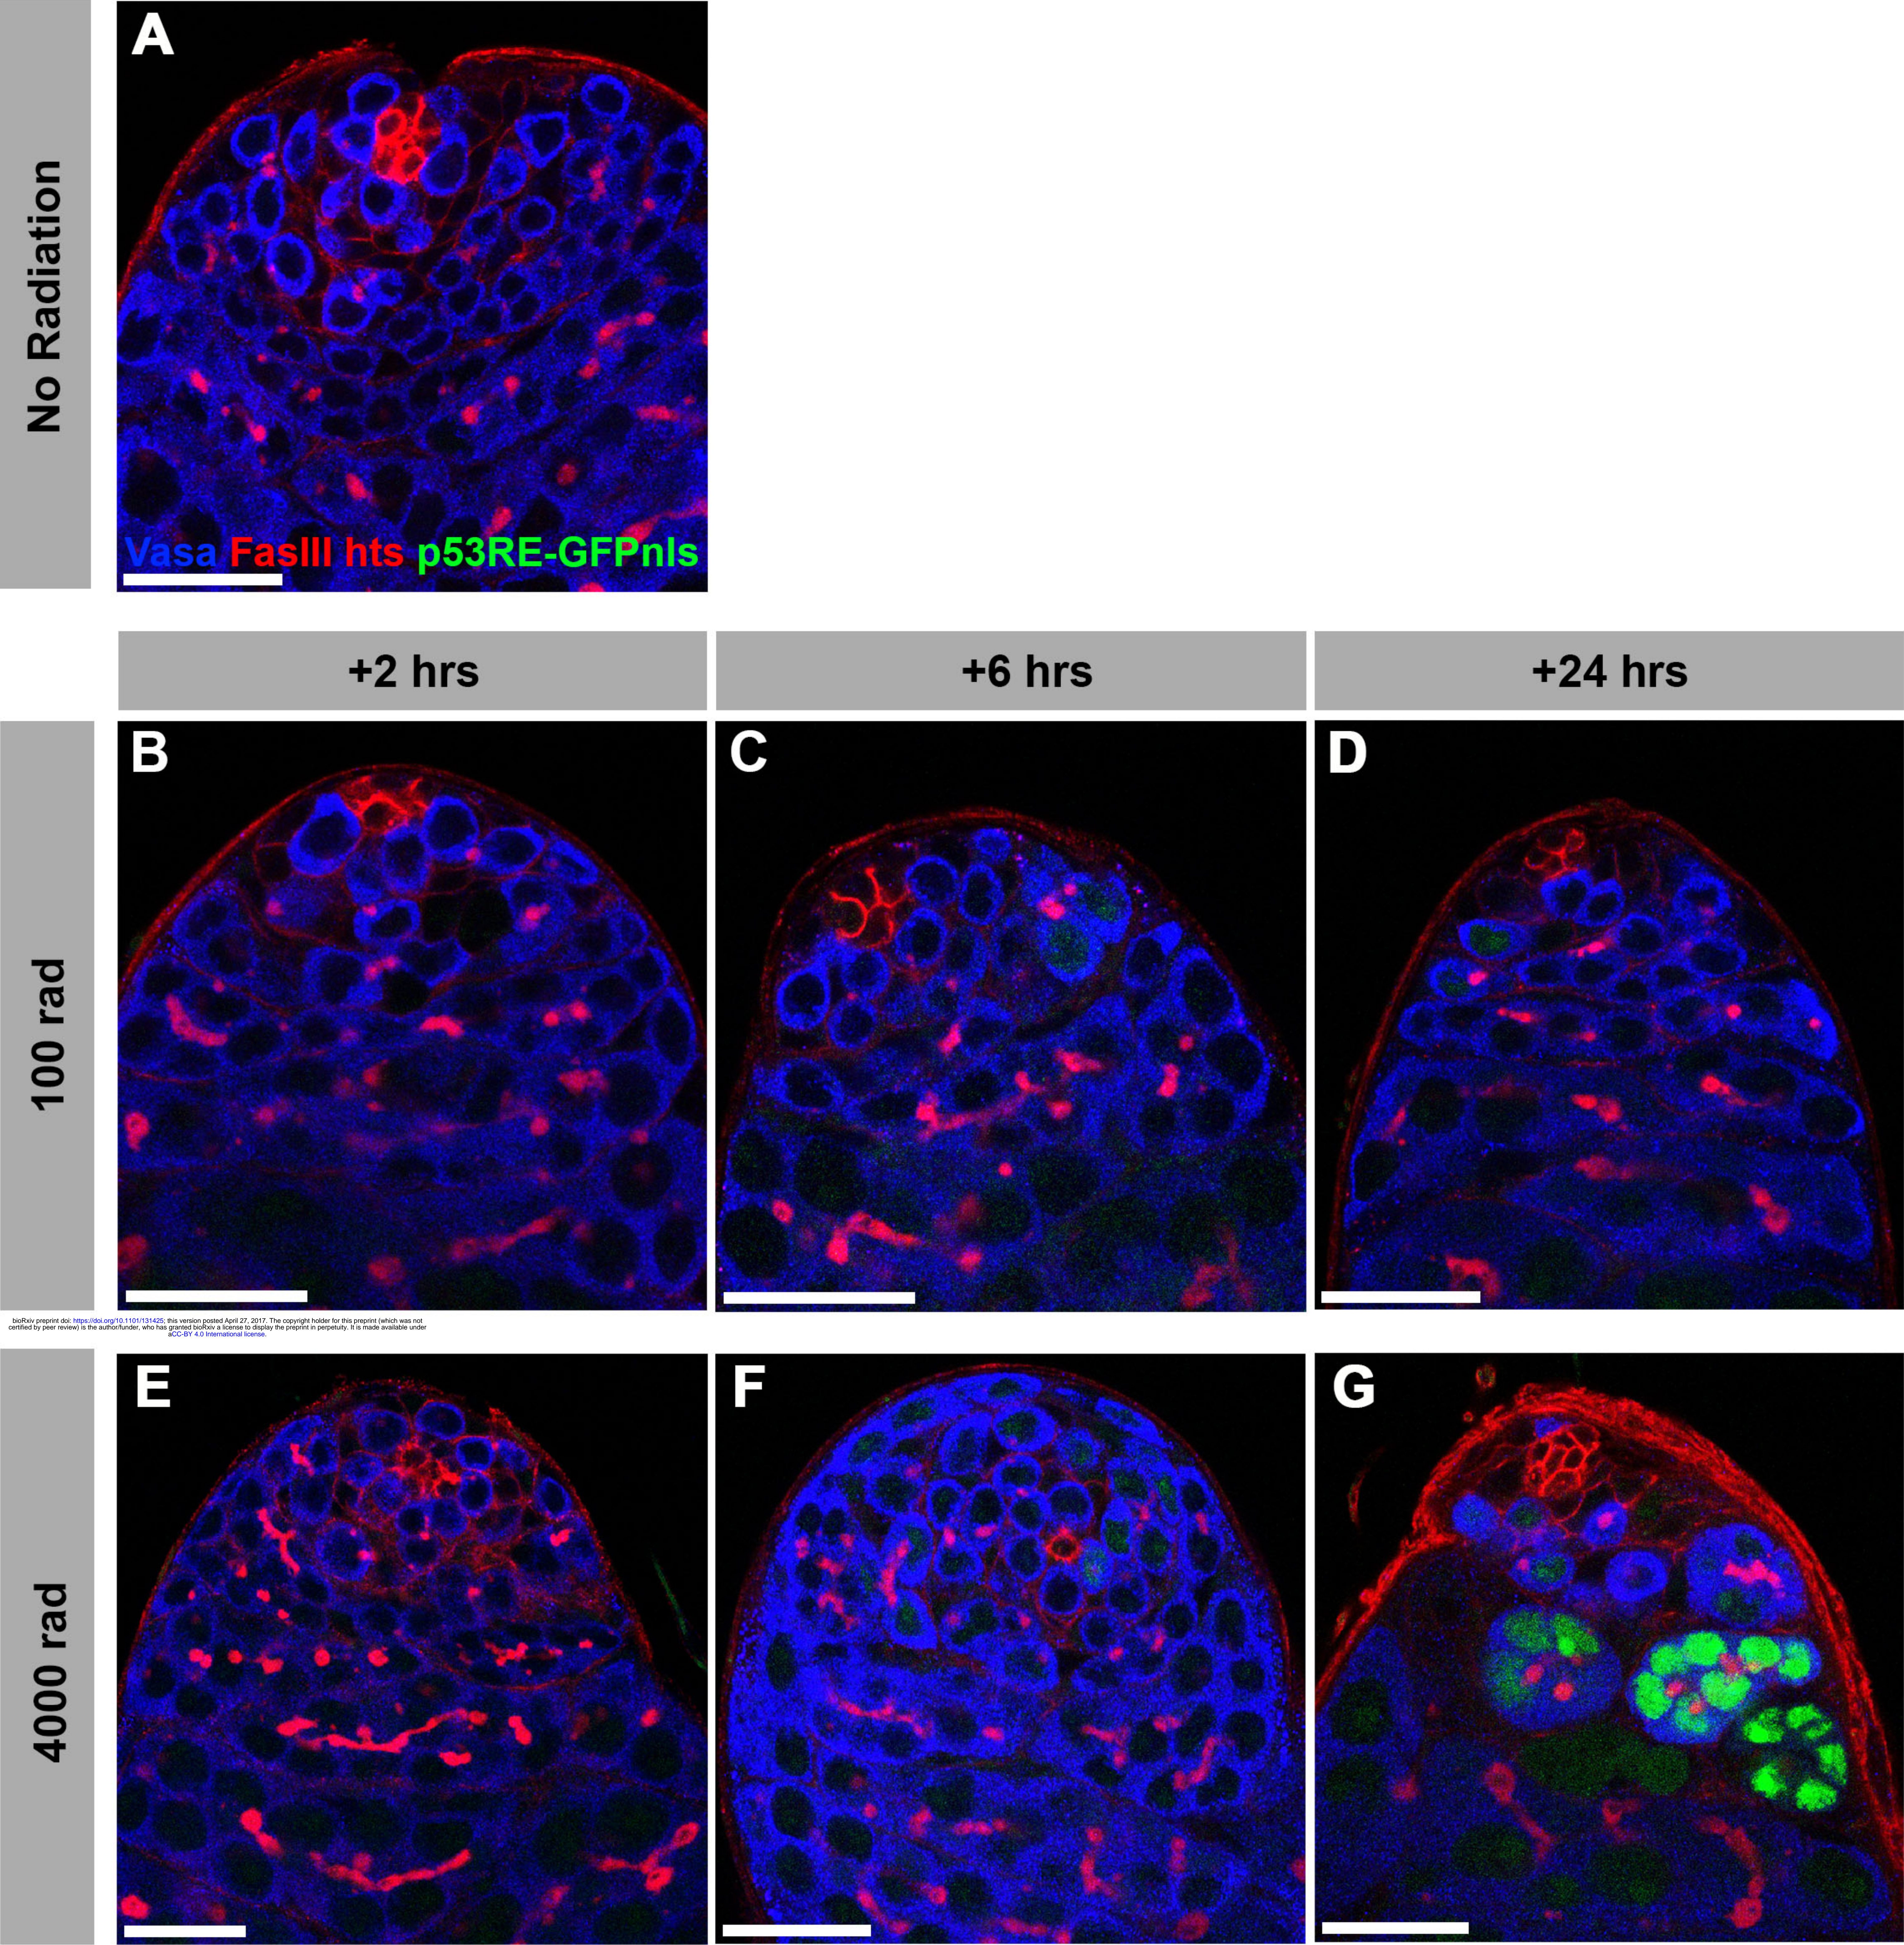

Source: http://biorxiv.org/content/10.1101/131425v1.full.pdf
